# Supplementary material for: Leveraging machine learning in porous media
Source: Royal Society of Chemistry journal article supplement (doi:10.1039/d4ta00251b), 2024-01-01
Supplement: d4ta00251b2.xlsx [file d4ta00251b2.xlsx]

## Sheet: ML in Porous Media
Leveraging machine learning in porous media
Supplementary Information II
Details of the reviewed literature.
Sections:
Heat exchanger and storage
Energy storage and combustion
Electrochemical devices
Hydrocarbon reservoirs
Carbon capture and sequestration
Groundwater

## Sheet: Heat exchanger and storage
Paper No	Year	Authors	Porous Media type	ML model	Application	Evaluation metric	Data-set	Input	Outputs targets or objectives)	Local equilibrium assumption (LTE)	Key findings	Novelty/Challenges/limitations	DOI	Title
1	2021	Duan, Li	PCM in metal foam	ANN	thermal management system for an electronic or photovoltaic system	R2 (ANN) = 0.9998, MSE=0.036		Time(series of melting timestamps) and porosities of the PCM porous systems	the liquid fraction, temperature, and average Nusselt number		the porosity of metal foam has a greater influence on the melting and heat transfer of PCM than the pore density	The effect of geometric sizes of the cavity for the heat transfer process of PCM in the metal foam is not considered. Second, only time and porosity are considered in training the ANN regression model. Future studies may consider more factors, such as environmental factors and so on. Finally, the ANN classifier can only distinguish two PCM-porous systems, which have significant differences in the…	doi.org/10.1016/j.est.2020.102160	Transient heat transfer analysis of phase change material melting in metal
2	2020	Wang et al.	semi-porous ribs in double-leyered microchannel	NSGA-II, TOPSIS decision maker	microchannel heat sinks	Max error=6.76%, Min error=0.06%		geometrical features	thermal resistance and pumping power		The thermal resistance and pumping power cannot reach their optimal value simultaneously. The contribution of the upper channel is reducing the overall pumping power, while the role of the lower channel is improving the cooling performance.	There has no work focusing on optimal design of MCHS with semi- porous-ribs, although the multi-objective and multi-parameter op- timization is indispensable.	doi.org/10.1016/j.ijheatmasstransfer.2019.119217	Optimization of a double-layered microchannel heat sink with semi-porous-ribs by multi-objective genetic algorithm
3	2022	Tikadar and Kumar	metal foam	k-nearest neighbor (KNN), random forest (RF), extreme gradient boosting (XGBoost), support vector regressor (SVR), and artificial neural networks (ANN),	heat sinks	Al with mean absolute percent error ( MAPE ) of about 4.59% and a 1.24 standard deviation (SD); except, SVR and ANN with a MAPEof less than 3.1%.	1000	two morphological parameters of MF such as porosity and pore density, flow condition, i.e., Reynolds number ( Re ), and MF geometrical dimensions, i.e., hydraulic diameter (Dh)	Nusselt number ( Nu ) and friction factor (f)		Results indicate that for testing datasets, all ML algorithms, except KNN, can predict the thermal-hydraulic performance of MFHS reasonably well	According to the authors declaration, to date, ML modeling techniques have not been utilized for MFHS to predict both thermal-hydraulic performance.	doi.org/10.1016/j.ijheatmasstransfer.2022.123438	Investigation of thermal-hydraulic performance of metal-foam heat sink using machine learning approach
4	2023	Eghtesad at al.	heterogenous resistance in high tempearture	ANN	thermal radiative properties prediction	max R2>0.944		Physical features, engineering geometrical features, (Porosity, void’s refractive index, particle’s refractive index, particles radius)	Transmission, Reflection		The prediction was made in three categories, called, whole-size, wall-wise and point-wise The last class showed the worst prediction, raising from the lack of directional geometrical features. The first class was the most accurate one.	Coupling the physical and geometrical features and introducing overlapping and non-overlapping models.	doi.org/10.1016/j.ijheatmasstransfer.2023.123890	A generalized characterization of radiative properties of porous media using engineered features and artificial neural networks
5	2022	Yang et al.	Metal foam (Al, Ni, Cu)	GA	heat storage systems	2.97%<Error<9.25%		porosity gradient, layer number, container structure parameter	thermal performance		Compared with the fixed porosity gradient structure, the un- fixed porosity gradient structure can further shorten solidification time under different layer numbers. The different parameters have little effect on the opti- mal porosity distribution and the optimal number of graded layers. Therefore, in order to reduce the structural complexity, the pro- cessing cost, and obtain better thermal per…	The study tried to solve the problem of low heat transfre rate and low efficiency, which is difficult to solve together by introdiucing the graded metal foams.	doi.org/10.1016/j.ijheatmasstransfer.2022.123309	A simplified phase change model and performance optimization of plate latent heat storage unit with graded porous
6	2020	Keykhah et al		PSO (LINMAP, TOPSIS, Shannon entropy decision maker)	heat exchanger			Porosity, nanofluid volume fraction, lower and upper height of porous medium	Nusselt number ( Nu ) and friction factor (f)		The results show that the Nusselt number and the friction coefficient increases and decreases with increasing the Darcy number, respectively and also, the Nusselt number and the friction coefficient reduces by increasing the porosity coefficient	Optimization for the specific application	doi.org/10.1016/j.physa.2019.123804	Heat transfer and fluid flow for tube included a porous media: Assessment and Multi-Objective Optimization Using Particle Swarm Optimization (PSO) Algorithm
7	2018	Siavashi et al.		PSO	heat exchanger			Porosity and grid size	PEC		Simultaneous optimization of particle size and porosity gave the same arrangements for porosity and particle size with a higher PEC.	The combination of gardient and multi-layered porous media using six different porous types, including linear increasing particle size (LIPS), linear decreasing particle size (LDPS), stepwise increasing particle size (SIPS), stepwise decreasing particle size (SDPS), constant minimum particle size (CMIPS), and constant maximum particle size (CMAPS)	doi.org/10.1016/j.applthermaleng.2018.04.066	Optimization of heat transfer enhancement and pumping power of a heat exchanger tube using nanofluid with gradient and multi-layered porous foams
8	2022	Meng et al		NSGA-II (TOPSIS decision maker)	heat exchanger			the position, number and relative distance of the porous pin fins	Power generated and pressure drop		Porous pin fins positively impact the ETEG system due to their good heat transfer capacity. Compared to the system with the design of solid through-type pin fins, an approximate 79.11% reduction in pressure drop and 21.30% improvement in output power is achieved in the system with porous though-type pin fins.	the direct setting of the pin fins in the channel to strengthen heat transfer and enhance the ETEG system performance	doi.org/10.1016/j.enconman.2022.116404	Performance enhancement for exhaust thermoelectric power generation system by using porous pin fins based on a fully automatic optimization method
9	2018	Ghritlahre, and Prasad	two types of screen matrices	Multi-layer perceptron (MLP), Generalized regression neural network (GRNN), Radial basis function (RBF)	Solar Air Heater	max R2=0.99758	96	mass flow rate, wind speed, atmospheric temperature, inlet fluid temperature, fluid mean temperature and solar intensity	Thermal performance		The performance results predicted by using ANN models are better than those obtained by using statistical MLR model. The GRNN model appears to better model as compared to MLP and RBF model for predicting thermal efficiency of SAH. After GRNN, MLP model performs better as compared to RBF model.	To predict the thermal performance of SAH using MLP, GRNN and RBF models of neural network; (2) To select the most appropriate model based on the criteria of best performance (3) To compare the three ANN models with MLR statistical model on the basis of statistical error analysis. As such the applied AI method has no major limitations but the requirement of large data points can be considered.	doi.org/10.1016/j.tsep.2018.04.006	Investigation of thermal performance of unidirectional flow porous bed solar air heater using MLP, GRNN, and RBF models of ANN technique
10	2021	Ilyas et al.	rotating porous with Al2O3-Cu-H2O hybrid nanofluid considering viscous dissolution and Joule heating	ANN(Levenberg-Marquardt backpropagation)	cooling of a medium pasing electrical current	validation performance between e-10 and e-12. absolute error lower than e-4	more than 400	porosity factor, inertia coefficient, Prandtl number, Brinkman number, radiation parameter, magnetic parameter, concentration of nanoparticles	velocity and temperature profile		The velocity profiles F, Fprime decreases as increases in the porosity factor, inertia coefficient, magnetic parameter, concentration of Cu nanoparticles values. The designed solver NN-LMBP is accurate, effective and efficient analyzed through statistical operators: minimum, maximum, standard division and mean statistical operators based on the absolute errors	the neural networks through Levenberg-Marquardt algorithm based on backpropagation not yet applied on the rotating disk with hybrid nanofluid problem along porous medium. The stability of the hybrid nanofluid is a limitation.	doi.org/10.1016/j.ijhydene.2021.06.065	Neuro-intelligent mappings of hybrid hydronanofluid Al2O3eCueH2O model in porous medium over rotating disk with viscous dissolution and Joule heating
11	2023	Butt et al.	nonlinear stretchable porous surface with multiple slip conditions with MHD casson nanofluid	inverse multiquadric radial basis neural networks	cooling of hot surface	Mostly MAE<e-4		Casson parameter (beta), Brownian motion parameter (Nb), Prandtl number (Pr), stretching parameter (n), porosity parameter (P), Lewis number (Le) along with temperature slip parameter (lambda2)	velocity, temperature and nanofluid concentration		Temperature diminishes with the increase in Prandtl number. Nanofluid concentration depreciates with the increase in Prandtl number, Lewis number and stretching parameter.	A quite new ANNs-IMQ-RBF solver is designed to solve MHD Casson nanofluid problem in the shape of a system of nonlinear ordinary differential equations	doi.org/10.1016/j.ijhydene.2022.12.319	Design of inverse multiquadric radial basis neural networks for the dynamical analysis of MHD casson nanofluid flow along a nonlinear stretchable porous surface with multiple slip conditions
12	2019	Ahmad et al.	Alumina, Silicon nitride	ANN, GA	cooling of hot surface	MAE(GA)<e-5		Non-dmensional variables determining transport phenomena	tempearture distribution		Through comparison of two different materials Si3N4 and Al, we concluded that Si3N4 has maximum heat transfer rate than Al. It is presented that using Al material for porous fin contributes higher measure of temperature instead of Si3N4 material.	comparison between two diferent types of porous media and optimization the problem including three different heat transfer types, including conduction, convection and radiation	doi.org/10.1016/j.cjph.2019.04.015	Design of computational intelligent procedure for thermal analysis of porous fin model
13	2022	Bayer et al.	porous micro-ribs	ANN (Levenberg-Marquardt backpropagation algorithm)	Microchannel heat sinks		3645	geometrical features; eight inputs (amplitudes and wavenumbers of each sinusoidal curve of the MCHS).	convective heat transfer coefficent and presssure drop to calculate Thermal efficiency factor (means PEC)		ANN predicted the CFD results accurately using six neurons. The wavy design not only improved the overall performance of the microchannel but also decreased the maximum temperature difference at the bottom of the channel. The heat transfer enhancement was due to the appearance of secondary flow (Dean vortices) in the wavy channels and the improvements were more prominent for increasing Re.	although with the augmentation of porous structures in recent years, significant mitigation in terms of pressure-drop has been achieved, the introduction of porous media has affected the thermal behavior of the microchannels adversely. This disadvantage of porous ribs could be eliminated by making use of waviness. One other concern about microchannel designs is the uniformity of the base temperat…	doi.org/10.1016/j.icheatmasstransfer.2022.105984	Investigation of double-layered wavy microchannel heatsinks utilizing porous ribs with artificial neural networks
14	2023	Butt et al.	wedge embedded in a porous medium under the influence of a magnetic field	inverse multiquadric radial basis NN	cooling	Absolute error<e-10		radiation parameter, magnetic parameter, constant moving parameter, heat source parameter, Brownian motion parameter and Eckert number	dynamical properties of the nanofluid including velocity, temperature along mass concentration		The accuracy, effectiveness and fast convergence attained by the newly designed IMQ-RBNNs-GASQP authenticate the worth of the solver. The increasing values of heat source parameter, Brownian motion parameter and Eckert number inflate the nanofluid temperature but a reversal effect is observed in the case of radiation parameter	A noval hybridization approach in the shape of IMQ-RBNNs-GASQP solver is applied to solve MHD nanofluid problem in terms of a nonlinear system of ODEs.	doi.org/10.1016/j.icheatmasstransfer.2022.106516	A novel design of inverse multiquadric radial basis neural networks to analyze MHD nanofluid boundary layer flow past a wedge embedded in a porous medium under the influence of radiation and viscous effects
15	2023	Khosravi et al.	With porous fins	ANN	microchannel heat sinks	MSE (ANN)<e-4	120 for comparison	different porous medium thicknesses, nanoparticle concentrations, and inlet mass flow rates	entropy generation		Increasing nanoparticle concentration and inlet mass flow rate negatively impacts thermal entropy generation and positively impacts frictional entropy generation. Bejan number greater than 0.994, indicates that thermal entropy generation is the dominant contributor to total entropy generation. An artificial neural network was used to predict entropy generation rate with high accuracy.	Sudy of irreversibility for a threedimensional straight MCHS integrated with HCPV system has not been carried out so far by other researcher. Also, impact of HNF on the thermal performance improvement of HCPV module is another merit of this research. Added to this, employing porous fin in MCHS and its effect on thermo-hydraulic characteristics has been rarely investigated. Another novelty of this…	doi.org/10.1016/j.enganabound.2023.02.005	Predicting entropy generation of a hybrid nanofluid in microchannel heat sink with porous fins integrated with high concentration photovoltaic module using artificial neural networks
16	2022	Selimefendigil et al.	porous moist objects	ANN (LM with BP)	dehumidification air system	MSE <e-5 and R>9.99e-1	606	time and drying temperature	liquid saturation		Non-monotonic variations of average Nu for each of the blocks are obtained when spacing parameters are varied	dynamic behavior of convective drying at the optimum spacing is modeled with artificial neural network (ANN) approach by using time as an additional parameter which delivers fast and accurate predictions as compared to high fidelity 3D simulation results. Further extension of the ANN can be considered by using dynamic neural networks when time dependent inputs are used in the system such as flow …	doi.org/10.1016/j.ijthermalsci.2021.107286	Optimization of convective drying performance of multiple porous moist objects in a 3D channel
17	2020	Abbasi et al.	segmental porous baffles on the shell side	ANN-NSGA-II	heat exchanger improvement	R2(ANN)>0.997	>500	Three geometric parameters (number of baffles, baffle angle, and baffle thickness) of	heat transfer and pressure drop to calculate system performance		The optimization study also in dicated that the distribution of baffle thickness at Pareto frontier is more concentrated near to the upper range of this parameter (20 mm). more concentrated near to the upper range of this parameter (20 mm). Results of current study also revealed that this type of STHX could enhance heat exchange rate by 139% with the corresponding 247% increment in pressure drop …	Effects of geometrical parameters of porous foams on the thermo-hydraulic performance of a segmental porous baffled STHX has never been reported before. The introduced STHX is more prone to fouling than is a STHX with solid baffles. The small pores in metal foams could be more easily blocked by impurities in shell-side flow. Therefore, identification of fouling mechanisms inside a STHX with porou…	doi.org/10.1016/j.applthermaleng.2020.115835	Shape optimization of segmental porous baffles for enhanced thermohydraulic performance of shell-and-tube heat exchanger
18	2021	Bianco et al.	finned metal foam heat sinks	NSGA-II	cooling of heat sinks	R2>0.93		In particular, foam porosity and PPI, inlet velocity, fin numbers and dimensionless inlet section, heat sink height and fin thickness	heat transfer and pressure drop	No	With the present results it is possible to conclude that optimization procedures on such devices can strongly enhance their performance. Finally, correlations of the Pareto fronts for the design of such devices are derived in terms of Nusselt vs. Poiseuille number and dimensionless heat rate vs. dimensionless pumping power.	porous media and metal foam heat sinks – as widely demonstrated through the years – have excellent heat transfer characteristics but poor performance in terms of pressure drop, and an optimization of these devices could be helpful to deeply understand how they could replace conventional heat transfer devices. In particular, to the best of the authors’ knowledge, no studies that optimize finned an…	doi.org/10.1016/j.applthermaleng.2020.116058	Multi-objective optimization of finned metal foam heat sinks: Tradeoff between heat transfer and pressure drop
19	2020	Su et al.	complex porous structures	ANN-MOO (Random order training data set and weighted objectives)	Cooling	Absolute error<e-2		Macroscopic properties, such as grid size, shape index, mesoscopic index, as well as conductive and convective related properties, such as Prandtl, Rayleigh and Schmidt number	Nusselt and Sherwood number	yes	Random order of training data set aids the ANN acuracy when there is a sparse data set.	Solution the problem of needing a large valome of data to feed ANN by using weighted objective function	doi.org/10.1016/j.cej.2020.125257	Sparse scattered high performance computing data driven artificial neural networks for multi-dimensional optimization of buoyancy driven heat and mass transfer in porous structures
20	2022	Zahoor Raja et al.	porous strtching/shrinking sheet	Bayesian Regularization technique based on Backpropagated neural networks (BRT-BNNs)	Cooling	MSE<e-10	101	thermal relaxation parameter, Prandtl number, fluid suction/injection and stretching/shrinking sheet	velocity and temperature field	yes	Velocity profile drop with the stretching and shrinking behavior of sheet while mass flux S left dual effect over flow rate. Temperature gradient fall down with the increment in Prandtl quantity Pr while rises up as enhance radiative heat flux	In future one can employ the artificial intelligence based infrastructures to efficiently solve the fluid flow models	doi.org/10.1016/j.asej.2021.08.015	Supervised neural networks learning algorithm for three dimensional hybrid nanofluid flow with radiative heat and mass fluxes
21	2022	Athith et al.	high porosity metal foam (Aluminum (Al), Copper (Cu) and Nickel (Ni))	ANN-NSGA-II	heat exchanger			height of fins, pore densities	Heat transfer rate and pressure drop	yes	The pressure drop increases with increase in the height of the metal foam and the inlet velocity. Though there is increase in pressure drop with the use of metal foam, but there is increment in 5–6 times of the heat transfer rate when compared to non-porous metal foam Channel. The velocity through the metal foam decreases with increase in PPI, as the velocity in the open region increases with the…		doi.org/10.1016/j.matpr.2021.11.248	Heat transfer optimization using genetic algorithm and artificial neural network in a heat exchanger with partially filled different high porosity metal foam
22	2021	Ahmad et al.	functionally graded material of porous fin	ANN (LMB)	Heat sink cooling	MSE<e-8	>300	spatial variable, FGM parameter	temperature distribution	yes	The convective and radiative parameters improve the thermal efficiency of the porous fin heat sink by increase the non-homogeneous index of functionally graded material. The parametric study shows that the temperature along the FGMF is negligible as compared to HMF. The fitness plot shows the data is very well trained and gives an accurate solution.	A new approach of intelligent computing is presented to examine the performance of the porous fin heat-sink model for both low and hightemperature profiles of the fin. The mean square error-index is introduced to a merit function for the analysis of the computational result of the fin models by using reference solution of fin model with the help of numerical method that is shooting technique. Tes…	doi.org/10.1016/j.surfin.2021.101403+N23	Stochastic numerical computing with Levenberg-Marquardt backpropagation for performance analysis of heat Sink of functionally graded material of the porous fin
23	2018	Du et al.	Made of silicon carbide	Multiobjective genetic optimization	solar receiver	-		Porosity, pore density and inlet velocity	Pressure drop, thermal efficiency	no	single-objective optimization results show that a large porosity and a large inlet velocity are preferable. The optimized pore size increases with the increase of the thickness of the receiver and the decrease of inlet velocity. By adopting the multi-objective optimization method, the flow resistance and the heat transfer efficiency are optimized simultaneously for the porous volumetric solar rec…	The method to select the appropriate parameters which guarantee a high efficiency of the volumetric solar receiver is not proposed in the previous studies.+M24	doi.org/10.1016/j.ijheatmasstransfer.2018.01.120	Optimization method for the porous volumetric solar receiver coupling genetic algorithm and heat transfer analysis
24	2018	Chen et al.	The soil has been modeled as a saturated porous medium	three-layer ANN	heat exchanger	R2=0.9999		the soil thermal conductivity, grout thermal conductivity, inlet flow, inlet water temperature, underground water velocity and heat flux	borehole depth	yes	Using the finite element method, a transient, 3D numerical model has been developed to simulate a vertical GHE. ANN without LM model could not present a precise prediction.	develpe a new model for a vertical geotehrmal heat exchanger	doi.org/10.1016/j.ijheatmasstransfer.2017.10.006	Development of ANN model for depth prediction of vertical ground heat exchanger
25	2015	Zheng et al.	multi-layer porous media	MOGA	heat exchanger	-		porosity of each layer	PEC	yes	the optimum PEC of enhanced tube by using multiple layers of optimized porous insert is about 2.5 times higher than by using one layer of optimized porous insert at Re = 800.	optimization of a multi-layer porous media though GA by coupling ANSYS Fluent and MATLAB	dx.doi.org/10.1016/j.ijheatmasstransfer.2015.04.016	Optimization of porous insert configurations for heat transfer enhancement in tubes based on genetic algorithm and CFD
26	2022	Khan et al.	porous fins	ANN(Levenberg-Marquardt Cascade feedforward backpropagation)	Heat sink cooling	absolute error<e-6	1001	inclination angle, tip tapering, porous wet parameter, internal heat generation, porosity, progressive natural convective parameter and dimension less radiative parameter	temoerature profile in the fin	yes	In contrast to a deterministic solvers, the stochastic approaches that are based on ANN can offer a continuous solution over the entire domain of integration	The use of neural network enables the design technique to avoid the singularity and non-linearity of the complex systems	doi.org/10.1007/s00158-022-03350-6	Heat transfer analysis of an inclined longitudinal porous fin of trapezoidal, rectangular and dovetail profiles using cascade neural networks
27	2016	ZhangJing et al.	porous inserts as circle sector	GA	Solar reciever through	fitness fucntion tolerance<e-6		Thernal conductivity, Porosity, Reynolds number	Nusselt number	yes	Enhanced reciever tube with this optimal porous insert can obtain better comprehensive performance than those with referenced porous inserts under the same condition. it can be found that the ERT with GA-I shaped porous insert can obtain higher heat transfer rate than clear receiver tube with the same pump power consumption or pressure drop	GA for a parabolic solar through with porous circular setor inserts and non-uniform heat flux	10.1007/s11431-016-0373-x	Thermal analysis of a solar parabolic trough receiver tube with porous insert optimized by coupling genetic algorithm and CFD
28	2018	Deshamukhya et al.	porous fins	GA	Heat sink cooling			prosity, Damkohler number, Nusselt number and the ratio of thickness to length	heat transfer rate	yes	The tip temperature decreaes by increasing Damkohler number, while heat transfer increases. PSO makes the heat transfer increased. Increasing the porosity decreased the heat transfer	To the best of author’s knowledge, there has not been any effort to study the multivariable optimization of porous fins using meta-heuristic algorithm. The convergence ability and its derivative free nature make PSO a good choice for this study.	10.1007/s12206-018-0846-9	Prediction of optimum design variables for maximum heat transfer through a rectangular porous fin using particle swarm optimization
29	2021	Sajjad et al.	sintered coated porous surfaces	ANN	Cooling a surfsce by boiling	R2>0.976 MAE=5.74%		porosity, coating thickness, particle size, wall superheat, and surface inclination as well as the thermophysical properties of the working fluids	pool boiling heat transfer coefficient	yes	The prediction was precise. The most significant aspect of the proposed model is its validity for different working fluids for a wide range of testing conditions	no precise empirical/mathematical model has been developed so for to predict the PBHTC for sintered coated porous surfaces. Heat transfer on the sintered coated porous surfaces relies on various parameters and the prediction is hard using traditional methods, which have several shortcomings of considering all the most influential parameters as inputs.	doi.org/10.1007/s10973-021-10606-8	A deep learning method for estimating the boiling heat transfer coefficient of porous surfaces
30	2022	Cui et al.	metal foam and foam metal-fin	ANN	Cooling and tehrmal energy storage	R2=0.9990		Fin number, inclined angle and meltih time	liquid fraction and average Nusselt number	yes	heat transfer performance of the metal foam-fin hybrid structure could reduce the melting time. the increase in the number of fins can improve the heat transfer performance and reduce heat accumulation in the top area with the inclination angle increasing. The energy storage density per unit volume decreases as a function of the increasing inclination angles and the number of fins within a case. …	The heat transfer enhancement mechanism of the metal foam-fin hybrid structure under different inclination angles is still elusive. Paraffin is selected as the PCM, and six kinds of enhanced heat transfer structures are compounded, including fin, metal foam, and metal foam-fin hybrid structures.	doi.org/10.1016/j.egyr.2022.07.178	Heat transfer analysis of phase change material composited with metal foam-fin hybrid structure in inclination container by numerical simulation and artificial neural network
31	2020	Mohammadi et al.		ANN-GA	heat exchanger with porous baffles	number of iteration=52		Permeability, porosity, baffle cut	Total heat transfer, Pressure drop	yes	The permeability of φ = e−9 m2 provides the highest heat transfer rate as well as the lowest pressure drop. The porosity of 20%. The results of sensitivity analysis indicated that baffle cut contributes the largest share in heat transfer and pressure drop also has the ability to transfer more heat and energy along the STHX, but at the baffle cuts lower than 40%, it produces large pressure drop.	there are a few research papers about the impact of porosity and consequently porous baffles on the performance of STHX. Study is limited to the steady state CFD and the fouling has not been modeled at all.	10.1016/j.applthermaleng.2020.115005	Artificial neural network and numerical analysis for performance enhancement of hybrid microchannel-pillar-jet impingement heat sink using Al2O3-water and CuO-water nanofluids
32	2017	Baiocco et al.	Metallic foam	Feedforward ANN	Heat Exchange Process in a Metal Foam	stop parameter of 1e-20		air temperature in input, water temperature in input, airflow rate, metal foam material (ANN)	output temperatures (ANN)	no	The prediction was found by the error less than 1%.		10.1016/j.procir.2016.06.035	Neural Networks Implementation for Analysis and Control of Heat Exchange Process in a Metal Foam Prototypal Device
33	2023	Singh et al.	horizontal bidispersive porous layer	ANN	prediction of convection onset		1000 points	Taylor number, Vadasz number, and four other non-dimesional parameters.	steady and oscillatory class.	yes	The combined effect of rotation, magnetic field, and inertia is to reduce the oscillatory mode of instability; hence, the system exhibits the steady mode of instability for a significant region in the three dimensional space comprising the Taylor number, the Hartman number, and the Vadasz number.	Machine learning techniques have been implemented to identify the mode of instability with respect to different parameters. Support vector machine, are used to examine the onset of oscillatory convection and stationary convection.	10.1063/5.0138421	Predicting the effect of inertia, rotation, and magnetic field on the onset of convection in a bidispersive porous medium using machine learning techniques
34	2021	Deshamukhya et al.	step and tapered porous fins	PSO	Heat sink cooling			Nusselt number, Rayleigh number, Damkohler number, porosity, geometrical features	Heat transfer rate with Volume constraints	yes	the heat transfer rate through step porous fins is highest followed by triangular and convex profiles. PSO have performed well in optimizing all the three profiles. The heat transfer of porous fins by 20% porosity was higher than the selid fins by 30%.	Till now the use of swarmbased algorithms have been restricted to porous fins of rectangular profiles and the encouraging results obtained has motivated the authors to optimize porous fins with step as well as tapered profiles in the current study.	10.1007/s00521-021-05911-0	A metaheuristic analysis of heat transfer rates through porous fins of tapered and step profiles: a comparative study
35	2016	Ge et al.	porous rings	NSGA-II	heat exchanger	R2=0.9995		Radii, Damkohler number, porosity	Nusselt number, friction factor	yes	TOPSIS made more than 40% increment in the Nu number and 80% decrement in the friction factor.	Applying penalty function in NSGA-II+M36	10.1016/j.ijheatmasstransfer.2016.05.118	Multi-objective genetic optimization of the heat transfer for tube inserted with porous media
36	2021	Hosseini and Siavashi	Ceramic	ANN-PSO	thermochemical porous reactor	MSE=e-06		nlet mass flow rate, inlet steam to methane ratio, porosity, number of pores per inch (PPI), permeability, and reactor length	Performance	yes	Optimization made the hydrogen higher than the all investigatd cases. Furtehr, applying a porous with porous layers, the hydrogen ptoduction was larger.	As a novel idea, a two-layer high permeable porous ceramic foam (with different layers’ properties) is used as the catalyst bed to improve the reaction performance	10.1016/j.solener.2021.10.026	Optimization of SMR process for syngas production through a solar-assisted thermo-chemical reactor with a multi-layered porous core
37	2018	Grosjean et al.	porous SiO2 antireflective coating	GA	solar receivers			Thickness, porosity, angle	solar transmittance	-	Glasses with low refractive indices and high Abbe numbers were found to be necessary to ensure high solar transmittance	considering the refractive index of the glass as a single value independent of wavelength.	10.1016/j.solmat.2018.03.040	Comprehensive simulation and optimization of porous SiO2 antireflective coating to improve glass solar transmittance for solar energy applications
38	2020	Du et al.	super-alloy Inconel 718	GA	solar reciever			pore diameter distribution, porosity	Thermal efficiency	no	the radial graded porous volumetric solar receiver with large pore diameter inside could further relatively increase the thermal efficiency by 4.1% while relatively decreases the flow resistance by 8.6%. local overheating phenomenon is observed in the uniform porous receiver using air as heat transfer fluid. By applying the coupled optimization method, an optimum pore diameter distribution is det…	the radial graded porous volumetric solar receiver is uswd for non-uniform solar flux	10.1016/j.apenergy.2020.115343	Experiment and optimization study on the radial graded porous volumetric solar receiver matching non-uniform solar flux distribution
39	2019	Pourrahmani et al.	wave-like aluminum porous ribs	ANN	heat transfer in proton exchange membrane fuel cell	RSME=0.99918	40844 points after training	geometrical features (total slope of the ribs, the height of the first rib, and the distance between the entrance and the first rib)	PEC, Nu, friction factor	yes	Results indicate that the height of the first porous rib plays the crucial role in Nu number and PEC, while the entrance length has the least effect on these outputs.	The main purpose of this study is to suggest a novel design to increase the heat transfer in PEMFCs, while reducing the frictional losses.	10.1016/j.applthermaleng.2019.01.010	Sensitivity analysis and performance evaluation of the PEMFC using wavelike porous ribs
40	2021	Alizadeh et al.		SVR-PSO	cooling	MAE(PSO)=0.4		Reynolds number, Biot number, Prandtl number, Solid volume fraction of nanoprticles (for Nusselt number)	Nusselt number, shaer stress, Bejan number, temperature field	no	Decreasing the time of data prediction more than 90% using trained ANN.	The study includes development and use of a machine learning tool trained by the computationally generated data.	10.1016/j.jtice.2021.03.043	A machine learning approach to the prediction of transport and thermodynamic processes in multiphysics systems - heat transfer in a hybrid nanofluid flow in porous media
41	2022	Alhadri et al.		ANN	cooling	R2=0.98,0.99		Porosity parameter, Hartmann number, Suction/injection parameter, Inertia coefficient	Nusselt number, friction factor	yes	On the decreasing surface, an increase in copper nanoparticle volume fractions induces an improvement in local skin friction and a decrease in local Nusselt number.	goal here is to investigate the Darcy–Forchheimer flow of hybrid nanofluid with the effect of joule heating condition with thermal radiation.	10.1016/j.jics.2022.100607	Response surface methodology (RSM) and artificial neural network (ANN) simulations for thermal flow hybrid nanofluid flow with Darcy-Forchheimer effects
42	2020	Wei et al.	nanoporous graphen	SVR	thermal properties prediction	R2>0.98		shape factor, bottleneck, channel factor, perpendicular nonuniformity, and dom- inant paths.	effective thermal conductivity	yes	Providing a physical description beneficial for structural anisotropy to explain very low or high tehrmal conductivity of porous materials.	Considering the structural features in the tehrmal properties prediction	10.1016/j.ijheatmasstransfer.2020.120176	Machine learning prediction of thermal transport in porous media with physics-based descriptors
43	2020	Mohebbi Najm Abad et al.		ANN-PSO	Cooling	MAE around 0.3		Reynolds number, permeability, Domkohler number, solid volumefraction of nanoparticles, mixed convection parameter	Nusselt number, Sherwood number	No	Reducing permeability lead to intensification of heat and mass transfer. Correlations of Nusselt and Sherwood number was derived by PSO.		10.1016/j.molliq.2020.113492	Analysis of transport processes in a reacting flow of hybrid nanofluid around a bluff-body embedded in porous media using artificial neural network and particle swarm optimization
44	2014	Dathathri, Balaji		BRANN (Bayesian-regularized artificial neural network)-NSGAII	Cooling		200 (for GA)	porosity, inlet velocity	Temperature, pressure drop	yes	The optimal porosity distribution across the layers and the inlet velocity, maximizing the heat transfer with the simultaneous consideration of minimizing the pressure drop were done.		10.1016/j.icheatmasstransfer.2014.11.009	Heat transfer and optimization studies on layered porous stackings under an imposed pressure drop
45	2022	Anand et al.	ceramic matrix	SOM	Cooling		up to 1000	Extinction coefficient, convection coupling	pair of gas and solid phase temperature profiles	no	the SOM correctly identifies the regimes of operation of the PCM. The SOM model is also trained with 1% noise in the input data and is able to correctly identify the regimes of operation of PCM, in that case as well.	Ability of SOM for the identification of operation of regimes, with different topologies like 1D and 2D nodes, gridtop and hextop configuration of nodes, link distance and box distance function, is studied.	10.1007/s13369-021-06489-4	Self-Organizing Map Network for the Decision Making in Combined Mode Conduction-Radiation Heat Transfer in Porous Medium
46	2022	Shoaib et al.		ANN	Cooling	MSE>e-9	up to 654	magnetic field parameter, thermal Grashof number, angle of inclination, Brownian motion parameter, Dufour-solutal Lewis number, modified Dufour parameter and thermophoresis parameter	Temperature, concentration	yes	Results reveal that velocity increases with the rise in Gr, whereas reverse trend has been noticed for angle of inclination and magnetic field parameter and the temperature profile increases with the increase in Dufour parameter, Brownian motion parameter, and thermophoresis parameter.	The novel application of Levenberg–Marquardt scheme with backpropagated neural network (LMS–BPNN). Different nanofluidic models need to examine.	10.1007/s40430-022-03451-9	Further analysis of double‑diffusive flow of nanofluid through a porous medium situated on an inclined plane: AI‑based Levenberg–Marquardt scheme with backpropagated neural network
47	2022	Rajabi et al.	heterogenous	ED-CNN	Cooling	root mean squared error (RMSE)<0.25 R2>0.97	up to 40000	High-resolution imaging in various Rayleigh numbers and geometrical features	mean and standard deviation maps of the output temperature	yes	The ED-CNN results reflect the general behavior of heat transfer obtained from numerical simulation. For the heterogeneous en- closure the maximum error occurs at the center of the domain where the temperature gradient is at its lowest, and the tem- perature is insensitive to Ra .	The first ues of Deep neural networks (DNNS) for natural convection in the porous media.	10.1016/j.ijheatmasstransfer.2021.122131	Analyzing the efficiency and robustness of deep convolutional neural networks for modeling natural convection in heterogeneous porous media
48	2022	Khan et al.		ANN	Cooling	e-07<MSE<e-14	around 420	Porosity parameter, Schmidt number, Brownian parameter, viscosity parameter, Prandlt number and thermophoric parameter	temperature account, concentration account and for velocity profile	yes	The accuracy of the used ANN was acceptable for this problem.	In future, one may apply the design BNN-LMS solver for problems arsis in the field of fluid mechanics effectively.	10.1016/j.icheatmasstransfer.2021.105436	Heat transfer between two porous parallel plates of steady nano fludis with Brownian and Thermophoretic effects: A new stochastic numerical approach
49	2017	Mishra et al.		Global search algorithm (GSA)-GA	thermal properties prediction	Absolute error<5%		the solid and gas temperature distributions, and convective and radiative heat fluxes	scattering albedo, emissivity, solid conductivity, and heat transfer coefficient	no	GSA demonstrated substantially better performance, in terms of both solution accuracy and CPU time requirement. CPU time depended strongly on both the number of starting points and error percentage.		10.1080/10407782.2016.1139910	Simultaneous estimation of four parameters in a combined-mode heat transfer in a 2D porous matrix with heat generation
50	2011	Singh et al.	Moist porous materiak	ANN	thermal properties prediction	MSE<0.0008	1000	thermal conductivity and volume fractions	effective thermal conductivity	yes	The different models of ANN exhibit the capability to use the ANNs for future predictions of effective thermal conductivity of various complex structures. For the effective thermal conductivity, the fluid phase plays a leading role because its conductivity is between those of the solid and the gas.	The complex structure encountered in moist porous materials, along with the differences in thermal conductivity of the constituents makes it difficult to predict the effective thermal conductivity accurately.	10.1016/j.buildenv.2011.06.019	Prediction of effective thermal conductivity of moist porous materials using artificial neural network approach
51	2017	Ghritlahrea, Prasadb		ANN	porous bed solar air heater	R2>0.999		mass flow rate, atmospheric temperature, inlet temperature of air and solar intensity	efficiencyheat gained by air, temperature difference of air and thermal	yes	The results obtained with Levenberg- Marquardt (TRAINLM) training function are more satisfactory than other remaining training functions, such as Polak-Ribiere Updates (TRAINCGP), One step secant back propagation algorithm (TRAINOSS).		10.1016/j.egypro.2017.03.033	Prediction of thermal performance of unidirectional flow porous bed solar air heater with optimal training function using Artificial Neural Network

## Sheet: Energy storage and combustion
Paper No	Section	Sub-section	Year	Authors	Porous Media type	ML model	Application	Evaluation metric	Data-set	Input	Key findings	Challenges/limitations	DOI	Notes	Title
1	Thermal energy storage	PCM	2022	Cao et al.	aluminum foam	-	the free convection of a mixture of water and Nano-encapsulated phase change material (NEPCM) with a porous medium was used to exchange heat energy between a cold-water stream and a hot tank filled phase change material (PCM)	-			•Temperature Distribution •Heat Transfer Rate •Energy Storage Capacity •Phase Change Material (Pcm) Melting And Solidification Time •Heat Transfer Enhancement	-	https://doi.org/10.1016/j.csite.2022.102123	Natural convection of water and NEPCM is a simulation for LHTES application.	Receiving heat from a PCM tank by using natural convection of water and NEPCM: A simulation for LHTES application
2			2016	Gopalan et al.	Lattice Frame Materials (LFMs) and honeycomb structures	-	The heat transfer characteristics of a phase change material (PCM) based heat sink using structured porous media as thermal conductivity enhancers (TCE) are numerically investigated and compared against that of pure PCM without any enhancers.	-	-	-	•Thermal Performance Of The Heat Sink •Distribution Of Input Heat Into The Sensible And Latent Components •Behaviour Of The Proposed Heat Sink Under Different Usage Conditions (Heavy, Light And Frequent) •Behaviour Of The Proposed Heat Sink In Discharging •Optimum Quantity Of Pcm Required Inside The Heat Sink	-	http://dx.doi.org/10.1016/j.ijthermalsci.2016.01.008	The thermal performance of a phase change material-based heat sink using structured porous media as thermal conductivity enhancers is numerically investigated and compared against that of pure PCM without any enhancers.	Numerical investigation of thermal performance of PCM based heat sink using structured porous media as thermal conductivity enhancers
3			2022	Saboori et al.	A novel macro-scale machine learning prediction based on high-fidelity CFD simulations: A case study on the pore-scale porous Trombe wall with phase change material capsulation	Block-based machine learning	multi-layer calculations loops based on machine learning used to simulate the flow pattern and the thermal behavior through pore scale porous media (PSPM) walls, including phase-change materials (PCMs) in Trombe walls	R^2=0.996	predicting the macro-scale domain by machine learning using the micro-scale CFD results as a training data set.	velocity; pressure; temperature for the fluid and solid zones	* Prediction and optimizing the concentration of PCM in the Trombe wall * find the optimum PSPM wall porosity	-	https://doi.org/10.1016/j.jobe.2022.104505		A novel macro-scale machine learning prediction based on high-fidelity CFD simulations: A case study on the pore-scale porous Trombe wall with phase change material capsulation
4			2021	Selimefendigil and Oztop	Effects of using a porous disk on the dynamic features of phase change process with PCM integrated circular pipe during nano-liquid forced convection in discharging operation mode	feed-forward artificial neural networks	Impacts of using a porous disk on the performance of a phase change material filled cylindrical container dur_x0002_ing forced convection of nanoliquid in discharging mode are investigated with finite element method.	R^2=0.9980	time = 81; permeability of the object = 8; porous object radius = 8; porous object height = 6	time; permeability of the object; porous object radius; porous object height	•Flow Field •Temperature •Phase Change Process Dynamic Features •Discharging Time	-	https://doi.org/10.1016/j.jtice.2021.02.013	The phase change process becomes fast with higher radius of the porous disk.	Effects of using a porous disk on the dynamic features of phase change process with PCM integrated circular pipe during nano-liquid forced convection in discharging operation mode
5			2021	Kolodziejczyk et al.	composite phase change materials (Cu-metal foam)	convolutional neural networks	Li-ion batteries’ thermal management	MSE= 3.5%	The created dataset in this work includes 20000 images and corresponding thermal conductivity values. The images are in RGB format made of 442 × 442 pixels.	20000 images and corresponding thermal conductivity values	•Effective Thermal Properties Of Composite Phase Change Materials (Cpcms) Consisting Of Paraffin And Copper Foam •Heat Generation And Electrochemical Response Of a Li Ion Cell During The Charging/Discharging •Effectiveness Of The Thermal Management Of The Battery Pack	In this modeling process, the challenging part is to develop representative microstructure of Cu-metal foam. The underlying geometry of the metal foam in this work is constructed using the Voronoi method via Python scripting.	https://doi.org/10.1016/j.ijheatmasstransfer.2021.121199	The model developed on the basis of a CNN can evaluate the effectiveness of the battery pack's thermal management system with an excellent accuracy in comparison with the original FEM models.	Machine learning assisted multiscale modeling of composite phase change materials for Li-ion batteries’ thermal management
6			2023	Venkata Sai Anooj et al.	Phase change materials (the mushy zone is treated as a porous medium with porosity equal to the liquid fraction of the corresponding cell)	Recurrent neural networks (RNN)	the diagnosis of phase change material-based thermal management systems	RMSE less than 0.015	345	surface temperature time series	•Liquid Fraction Of PCM	The study shows that challenging heat transfer problems are amenable to treatment with machine learning algorithms.	https://doi.org/10.1016/j.applthermaleng.2022.119864	The RNN model can predict the temporal liquid fraction of PCM by showing a correlation up to 0.99 with the numerically obtained liquid fraction.	A machine learning methodology for the diagnosis of phase change material-based thermal management systems
7			2023	Xiao et al.	Phase change materials (PCMs) + multi-channel thermal storage tank filled with metal foam	LSTM-BP neural network	A LSTM-BP neural network for predicting the average temperature and liquid fraction of the PCM is developed	RMSE=0.6154	-	HTF inlet velocity, temperature and time	the whole melting time of the PCM is diminishing with increasing HTF velocity (or temperature)	-	https://doi.org/10.1016/j.enganabound.2022.10.014		LSTM-BP neural network analysis on solid-liquid phase change in a multi-channel thermal storage tank
8		Adsorption	2021	Tonekaboni et al.	copper porous media (95% porosity)	-	For improving solar systems, nanofluid and porous media are used in solar collectors.	-	10 states	Average ambient temperature; Solar beam irradiation; Temperature difference in recuperator; Electromechanical efficiency of the generator; Turbine isentropic efficiency; Heat exchanger efficiency; Cover emittance; Average wind speed; Room temperature in summer; Room temperature in winter; Sun temperature	•Energy Efficiency Enhancement In Solar Collectors •Exergy Efficiency Enhancement In Solar Collectors And Scchp Systems	-	https://doi.org/10.1155/2021/9984840	The optimal amount of nanofluid in porous materials has been calculated to the extent that no sediment is formed.	Optimization of Solar CCHP Systems with Collector Enhanced by Porous Media and Nanofluid
9			2022	Skrobek et al.	Silica gel	Long short-term memory (LSTM), Bidirectional; Long Short-Term Memory (BiLSTM); Gated recurrent unit (GRU)	Deep learning methods applied to predict the mass of an adsorption bed in the fixed and fluidized bed.	R^2=0.97	-	absolute pressure in the adsorption chamber; absolute pressure in the evaporator; relative pressure; temperature in the adsorption bed (bed center); the temperature in the adsorption bed (25 mm from the bed center); type of the mixture; the percentage value of the addition;	•Mass Of An Adsorption Bed In Fixed Bed •Mass Of An Adsorption Bed In Fluidized Bed	-	https://doi.org/10.1016/j.advengsoft.2022.103190	The GRU network guarantees predicting the mass of both the fluidized and fixed beds with the best agreement with the measurement results.	Implementation of deep learning methods in prediction of adsorption processes
10			2020	Shi et al.	metal organic frameworks	back propagation neural networks (BPNN), decision tree (DT), random forest (RF), and support vector machine (SVM)	To select the promising adsorbents and suitable working fluids in this technology, a high-throughput computational screening of 6013 computation-ready experimental metal organic frameworks (MOFs) is employed to identity the best candidates for methanol-MOF pairs in adsorption_x0002_driven heat pumps and chillers	R value = 0.86	6013	the largest cavity diameter; density; void fraction; volumetric surface area; pore-limiting diameter; an energy descriptor, heat of adsorption	•COP •Working Capacity	-	https://doi.org/10.1016/j.ces.2019.115430	Machine learning was quantificationally determined to be good indicators for the heat pumps.	Machine learning and in silico discovery of metal-organic frameworks: Methanol as a working fluid in adsorption-driven heat pumps and chillers
11		TCES	2023	Chen et al.	CaCO3/CaO	ML	the synergetic effect of complex pore structures and different operating conditions on the micro-flow diffusion mass transfer performance inside CaO materials.	RMSE=0.041	-	complex pore structures; the micro-flow diffusion mass transfer performance inside CaO materials	•Effective Gas Diffusion Coefficient	Although the predicted results were satisfactory, there were some challenges in terms of effective gas diffusion coefficient prediction. First, the error should have been further reduced. The solution to this problem would be to (1) increase the amount of training data, (2) adjust the kernel function or the other machine learning methods, (3) pre-process the training data (for example data cleani…	https://doi.org/10.1016/j.renene.2023.01.091	The synergetic effect should be considered for mass transfer performance inside CaO materials with high porosity and low fractal dimensions.	Mass transfer performance inside Ca-based thermochemical energy storage materials under different operating conditions
12			2022	Kiyabu et al.	Salt Hydrates	Four ML algorithms were examined: ridge regression, k-nearest neighbors (k-NN), support vector machine regression (SVM), and random forest regression (RF)	improving the energy density of TES materials is an important step in accelerating the adoption of TES systems	the standard deviation of the mean test error was no larger than 0.1 kJ/mol H2O.	5292	the DFT-generated data	•Energy Densities •Turning Temperatures •Thermodynamic Stabilities	-	https://doi.org/10.1021/jacs.2c08993	The hydrates of several metal fluorides are stable TES materials with class-leading energy densities and operating temperatures suitable for use in domestic heating and intermediate-temperature applications.	Discovery of Salt Hydrates for Thermal Energy Storage
13			2020	Malley-Ernewein and Lorente	Salt	-	how the design of the elemental component of a designed reactor for thermochemical energy storage can be improved for better energy performance and less pumping power	-	-	Temperature of the system; Pressure; vapor concentration; mass flow rate	•Energy Performance •Pumping Power •Heat Exchanges	-	https://doi.org/10.1016/j.ijheatmasstransfer.2020.119975	The design of open systems is changed to dendritic configurations while keeping the salt and fluid volumes constant.	The shape of the elemental system in a porous medium designed for thermochemical energy storage
14			2020	Praditia et al.	CaO and Ca(OH)2	Gaussian Process Regression (GPR); Support Vector Machine (SVM)	implementing a Physics Informed Neural Network (PINN) to predict the dynamics of the TCES internal state	MSE= 3.96*10^-4	100	As input to the simulator, we need the material parameters such as CaO density (ρCaO), Ca(OH)2 density (ρCa(OH)2 ), CaO specific heat capacity (cp,CaO), Ca(OH)2 specific heat capacity (cp,Ca(OH)2 ), CaO thermal conductivity (λCaO) and Ca(OH)2 thermal conductivity (λCa(OH)2 ); porous medium parameters such as absolute permeability (K) and porosity (φ); reaction kinetics parameters such as reaction…	estimate the state of charge of the device that is implied in the CaO volume fraction νCaO. The device in fully charged condition corresponds to νCaO = 1 and vice versa. We are also interested in the output variables p, T and xg,H2O (H2O mole fraction). The behaviour of these variables, especially p, is very nonlinear. Therefore, it is interesting to see the prediction of the ANN for these nonlin…	-	https://doi.org/10.3390/en13153873	The suggested Physics-Informed Neural Network can be further developed for more complicated analysis of the TCES system.	Improving Thermochemical Energy Storage Dynamics Forecast with Physics-Inspired Neural Network Architecture
15			2023	Tasneem et al.	NH4NO3 and the KOH	k-nearest neighbors (KNN), least absolute shrinkage and selection operator (LASSO), extreme gradient boosting (XGBoost), support vector machines (SVM) and Bayesian ridge accurate models	predict the dynamic behavior of a reversible thermochemical reactions based system.	R^2=0.949	14000	KOH temperature and water temperature / inputs are the temperature of NH4NO3 and water	•Dynamic Behavior Of a Reversible Thermochemical Reactions Based System •Nh4No3 Temperature •Koh Temperature	-	https://doi.org/10.1016/j.jtice.2023.104926	The KNN degree 3 has the best value among all methods for making a model.	Machine learning modeling of reversible thermochemical reactions applicable in energy storage systems
16	Electrochemical energy storage	Battery	2022	Ishikawa et al.	electrode porous structures	nonlinear regression based on a support vector machine	considering the characteristics of each electrode layer of a lithium-ion battery, the correlation equation of the effective ion conductivity was formulated using a machine learning model.	R^2=0.957	500	The size of the image used for the CNN input	•Effective Ion Conductivity •Tortuosity •Particle Aspect Ratio •Cross Sectional Image Of The Electrode •Other Structural Properties Or Images	the packed particles targeted by the SVR are limited to those that can express the particle shape as a parameter. Therefore, when evaluating a porous material that is difficult to parameterize, it may be more effective to use a CNN as the prediction model.	https://doi.org/10.1016/j.powera.2022.100094	The tortuosity of a structure likely depends on the aspect ratio.	Simulation to estimate the correlation of porous structure properties of secondary batteries determined through machine learning
17			2022	Weber et al.	porous electrodes	CNN	High fdelity simulations have also been employed to train convolutional neural networks (CNNs) to estimate efective battery properties directly from images of porous electrodes.	RMSE=5.78%	100000	real SEM images of electrodes	•Electrode Effective Transport Coefficients •Effective Battery Properties	One current limitation in using CNN to estimate efective properties of porous elec_x0002_trodes from microstructural images is the cost associated with the training, which requires the solution of coupled PDEs on complex domains. As a result, state-of-the-art methods either restrict the size of the training set at the cost of predictive accuracy, and/ or consider material packings of regular shap…	https://doi.org/10.1007/s11242-022-01862-9	A homogenization-informed CNN predicts transport properties from microstructural images.	Homogenization‑Informed Convolutional Neural Networks for Estimation of Li‑ion Battery Efective Properties
18			2020	Jiang et al.	active Ni-rich NMC	machine learning-based segmentation	we tackle this issue with a unique combination of multiscale experimental approaches, machine-learning-assisted statistical analysis, and experiment-informed mathematical modeling.	-	-	The 2D phase maps retrieved from all angular projections were then used as input for a tomographic reconstruction based on the filtered back projection algorithm method (ESRF PyHST software package).	•Degree Of Particle Detachment •Charging Rate •Degree Of Uncertainty In Particle Detachment •Reconstructed Electron Density As a Proxy For State Of Charge	There are few limitations with the current procedure. First of all, the disassembling process could cause damage to the electrode and, subsequently, affect the result of the statistical analysis. Second, the relaxation of the electrode may lead to charge redistribution in the electrode, making it difficult to evaluate the electrode scale chemical heterogeneity, which could be thermo_x0002_dynamic…	https://doi.org/10.1038/s41467-020-16233-5	The degree of particle detachment is positively correlated with the charging rate.	Machine-learning-revealed statistics of the particle-carbon/binder detachment in lithium-ion battery cathodes
19			2022	Dubey et al.	carbon‑based electrode materials	ANN	electrochemical performance	RMSE=0.98	900	Micropore; Mesopore; Electrolyte properties; Heteroatom-doped elements; Oxygen; Intensity ratio; Specifc surface area; Voltage; Total pore volume	•Electrochemical Performance Of The Supercapacitor (Specifc capacitance; Energy density)	-	https://doi.org/10.1007/s11581-022-04480-z	Artificial neural network and Random Forest model provided better accuracy with higher correlation coefficient values (0.851 and 0.852, respectively) in comparison to other models.	A data‑driven approach for evaluation of electrolyte informatics on electrochemical performance of carbon‑based electrode materials
20			2023	Ogihara et al.	Intercalated metal-organic frameworks (iMOFs)	ML (random forest technique)	Intercalated metal-organic frameworks (iMOFs) based on aromatic dicarbox_x0002_ylate are appealing negative electrode active materials for Li-based electro_x0002_chemical energy storage devices.	-	-	Materials selection; synthesis; structural characterization	•Capacity Retention •Cycling •Discharge Capacity Retention After 1000 Cycles	-	https://doi.org/10.1038/s41467-023-37120-9	A naphthalene-based multivariate material allows the reversible storage of Li-ions in nonaqueous Li metal cell configuration.	Heterogeneous intercalated metal-organic framework active materials for fast-charging non-aqueous Li-ion capacitors
21		Supercapacitor	2023	Kaya et al.	Activated carbon	hybrid artificial neural networks-genetic algorithm	Optimization of capacitance in supercapacitors	RMSE = 41.2 F/g	1654	design parameters; operational parameters	Capacitance	-	https://doi.org/10.1016/j.jpowsour.2023.232987	The hybrid ANN-GA optimization tool combined with Big M method yields a feasible solution.	Optimization of capacitance in supercapacitors by constructing an experimentally validated hybrid artificial neural networks-genetic algorithm framework
22			2022	Nanda et al.	activated porous carbon	(a) Random Subspace (RS) + Random Committee (RC); (b) Random Subspace (RS) + Random Forest (RF); (c) Random Committee (RC) + Random Forest (RF)	find a correlation between these inherent features and supercapacitor performances in terms of cyclic stability	RMSE = 10.4824	801	(i) type of electrodes, (ii) number of electrodes, (iii) composite, (iv) number of metals (v) 1st metal (vi) 2nd metal (vii) carbon/polymer, (viii) morphology, (ix) testing current density (A/g), (x) electrolyte, (xi) lower voltage window (V), (xi) higher voltage window (V), (xiii) voltage window difference (V), (xiv) specific capacitance (F/g) and (xv) number of cycles.	•Cyclic Stability Of Supercapacitors	There are a few challenges when applying ML algorithms for per_x0002_formance prediction. Firstly, the ML models need massive data to capture the correlation between input features and output desired physical or chemical properties, which is a very time-consuming pro_x0002_cess. Secondly, the model that we have proposed cannot be extrapolated to predict the performance for applications other than…	https://doi.org/10.1016/j.jpowsour.2022.231975	Electrodeposited Ni(OH)2 on Ni foam is a combination that is industrially relevant.	Machine learning aided cyclic stability prediction for supercapacitors
23			2022	Saad et al.	Graphene electrodes	k-nearest neighbors' regression (KNN); decision tree regression (DTR); Bayesian ridge regression (BRR); artificial neural network (ANN)	Developing an accurate and effective prediction technique for electrochemical performance is essential to decrease the time required for designing and testing electrode materials.	R^2=0.88	189	Cell configuration, potential window, specific current density, electrolyte ionic conductivity, electrolyte concentration, electrode configuration, pore size, pore-volume, SSA, N at.%, C at.%, O at.%, I_D/I_G ratio, RCT, and RS	•Specific Capacitance (F/G) Of Graphene Based Electrode Structures	-	https://doi.org/10.1016/j.est.2022.105411	The artificial neural network model delivers extremely accurate prediction results compared to the other models developed for this purpose.	Data-driven machine learning approach for predicting the capacitance of graphene-based supercapacitor electrodes
24			2022	Rahimi et al.	microstructures of activated carbon	MLP-NN	Artificial Neural Network (ANN) achieves a superior model to interpret how microstructural features, N/O configurations, and operational parameters influence the EDLCs performance	R^2=0.99	259	PW, Smic, Vmic, N%	•R2 •Mape •Rmse	-	https://doi.org/10.1016/j.jpowsour.2021.230968	The best N/O co-doped activated carbon was obtained by a genetic algorithm.	The best N/O co-doped activated carbon was obtained by a genetic algorithm.
25			2021	Ghosh et al.	mesoporous	(i) multilayer perceptron model (MLP) and (ii) random forest model (RF)	a combinatorial approach of value and grade prediction machine-learning models are used to predict the performance of a novel material (cerium oxynitride) for supercapacitor application	RMSE = 0.29	581	morphology and specific surface area	•Specific Capacity •Cyclic Stability		https://doi.org/10.1016/j.ensm.2021.05.024	The prediction and validation made in this study are of contemporary relevance.	Machine learning-based prediction of supercapacitor performance for a novel electrode material: Cerium oxynitride
26			2022	Lu et al.	carbonized metal–organic framework	ANN	an emerging machine learning strategy for both electrochemical sensor and supercapacitor using car_x0002_bonized metal–organic framework (C-ZIF-67) is proposed.	R^2=0.9967	671073	The resulting optimized ZIF-67 structure	•Electrochemical Response For Niclosamide (Na) •Linear Ranges Of Intelligent Analysis From 1 Nm To 9 Μm •Low Limit Of Detection Of 0.3 Nm •Capacitance Of Supercapacitor	-	https://doi.org/10.1016/j.jelechem.2022.116634	The developed sensor displays excellent electrochemical response about 196.6-fold improvement compared with the bare GCE for niclosamide.	An emerging machine learning strategy for electrochemical sensor and supercapacitor using carbonized metal–organic framework
27		fuel cell	2020	Zhang et al.	Porous media flow field (e.g. metal foam)	support vector machine (SVM)	a data-driven surrogate model based on support vector machine (SVM) is applied to optimize porous media flow field geometry.	R^2=0.9948	60	fiber diameter, fiber distance, and output voltage	•Reactant Gas Transfer and current density, I, A cm− 2. •Liquid Water Discharge •Electron Conductance •Heat Transfer •Uniform Distributions Of Oxygen •Uniform Distributions Of Liquid •Uniform Distributions Of Current Density •Uniform Distributions Of Temperature		https://doi.org/10.1016/j.enconman.2020.113513	The proposed data-driven surrogate model is effective in the design and optimization of porous media flow field.	Optimization of porous media flow field for proton exchange membrane fuel cell using a data-driven surrogate model
28			2022	Liu et al.	porous structure of the CL (e catalyst layer)	deep learning	the three_x0002_dimensional (3D) porous structure of the catalyst layer is reconstructed based on the deep convolutional generative adversarial network (DCGAN) deep learning method, utilizing focused ion beam scanning electron microscopy (FIB-SEM) microstructure graphs as training data.	-	FID	a dataset with an input size of 512 × 512 × 600 px	•3D Porous Structure Of The Catalyst Layer •Porosity •Particle Size Distribution •Tortuosity	When FIB-SEM is applied to obtain structural images, owing to technical limitations, a certain distance will exist between each set of two sectional images, and the structure between these images is generally predicted according to the upper and lower images.	https://doi.org/10.1016/j.powera.2022.100084	The data generated by DCGAN shows an adjacency relationship with real data.	3D generation and reconstruction of the fuel cell catalyst layer using 2D images based on deep learning
29	Hydrogen gas energy storage	hydrogen	2023	Hai et al.	zeolite	Artificial neural networks	This work applies several well_x0002_established artificial intelligence techniques to correlate the HACZ to surface and pore characteristics of zeolites, pressure, and temperature.	regression coefficient = 0.99875	318	surface and pore characteristics of zeolites, pressure, and temperature.	•Hydrogen Adsorption Capacity Of Zeolites (Hacz)	-	https://doi.org/10.1016/j.icheatmasstransfer.2023.106848	The role of the BET surface area of zeolites on the hydrogen adsorption capacity of zeolites is more vital than the pore volume.	Machine learning-aided modeling of the hydrogen storage in zeolite-based porous media
30			2019	Gopalan et al.	hydrogen adsorption in nanoporous materials	Gaussian Process Regression (GPR)	a fast and accurate, semi-analytical method for predicting hydrogen adsorption in nanoporous materials.	R^2=0.93	12,914 structures	temperatures and speed	•Adsorbed Amount Of Hydrogen •Hydrogen Adsorption Isotherms •Deliverable Capacities Of Mofs	-	https://doi.org/10.1080/00268976.2019.1658910	The adsorbed amount is calculated as an integral over the energy density of adsorption sites (guest-host interactions) plus an average guest-guest term for any temperature and pressure.	Prediction of hydrogen adsorption in nanoporous materials from the energy distribution of adsorption sites
31			2019	Bucior et al.	nanoporous materials, such as metal-organic frameworks	supervised learning method	a data-driven approach to accelerate materials screening and learn structure-property relationships	R^2=0.96	50,000 experimental MOF structures	3D energy landscape	•Gas Uptake In Multiple Mof Databases •Hydrogen Deliverable Capacity	-	https://doi.org/10.1039/C8ME00050F	A weak attraction between hydrogen and the framework is ideal for cryogenic storage and release.	Energy-Based Descriptors to Rapidly Predict Hydrogen Storage in Metal-Organic Frameworks
32			2020	Witman et al.	metal hydride	Interpretable Machine Learning	high-pressure hydrogen storage	MAE = 1.52	4094 (HydPARK database)	thermodynamic data that is not easily calculated but readily measurable, such as the equilibrium pressure of H2, Peq, at a given temperature, T.	•Thermodynamic Properties Of Metal Hydrides •Equilibrium H2 Pressure	-	https://doi.org/10.1021/acs.jpclett.9b02971	The metal hydride equilibrium H 2 pressure is computed from just the elemental composition of the intermetallic alloy.	Extracting an Empirical Intermetallic Hydride Design Principle from Limited Data via Interpretable Machine Learning
33			2019	Anderson et al.	porous crystals such as metal−organic frameworks and covalent organic frameworks	Artificial neural networks	reduce the storage pressure	MAE = 0.75	18000	temperature and pressure	•Hydrogen Loadings •Optimal Deliverable Capacity	-	https://doi.org/10.1021/acs.jpcc.8b09420	The attainable deliverable capacity for the 100 bar/77 K 5 bar/160 K swing was 62 g/L.	Attainable Volumetric Targets for Adsorption-Based Hydrogen Storage in Porous Crystals: Molecular Simulation and Machine Learning
34			2021	Ahmed et al.	metal-organic frameworks (MOFs)	machine learning models (extremely randomized trees ML algorithm)	metal-organic frameworks (MOFs) holds promise due to the low operating pressures, fast kinetics, reversibility, and high gravimetric densities typical of MOFs.	R^2=0.997	918734	7 structural features	•H2 Storage Capacity In Mofs	some of the high-capacity MOFs identified here may prove difficult to synthesize. Although this limitation applies primarily to the hypothetical MOFs, in some cases real MOFs are also known to undergo framework collapse during activation, which would reduce capacity.	https://doi.org/10.1016/j.patter.2021.100291	The web models can predict the performance of new MOFs.	Predicting hydrogen storage in MOFs via machine learning
35			2021	Rahimi et al.	hydrogen adsorption of activated carbons (ACs)	Support vector machine (SVM)( SVM-based genetic algorithm (GA) technique)	Three Machine learning (ML) models were constructed and tested to model the hydrogen adsorption of activated carbons (ACs). Although many efforts have been accomplished, the details of micro structure-efficiency of ACs still remains uncovered.	RMSE = 0.06	-	ACs’ structural characteristics such as micropore surface area, pore volume, and pore-size distribution	•Hydrogen Adsorption •Hydrogen Uptake	-	https://doi.org/10.1016/j.jclepro.2021.129714	The effects of microstructure properties on hydrogen storage were optimized using the SVM-based genetic algorithm technique.	Machine learning approaches to rediscovery and optimization of hydrogen storage on porous bio-derived carbon
36			2021	Kusdhany et al.	porous carbon materials	Explainable AI	To understand hydrogen uptake in porous carbon materials, we developed machine learning models to predict excess uptake at 77 K based on the textural and chemical properties of carbon, using a dataset containing 68 different samples and 1745 data points.	R^2=0.910	68	textural and chemical properties of carbon	•Excess Hydrogen Uptake At 77 K	a major challenge in this work was the fact that most studies in the literature failed the inclusion criteria.	https://doi.org/10.1016/j.carbon.2021.04.036	Pressure and Brunauer-Emmett-Teller surface area are the two strongest predictors of excess hydrogen uptake at 77 K.	New insights into hydrogen uptake on porous carbon materials via explainable machine learning
37	Hybrid energy storage	Thermal- electrical	2013	Zhang et al.	graphene-based three-dimensional porous carbon material	-	In pursuing higher energy density with no sacrifice of power density, a supercapacitor-battery hybrid energy storage device—combining an electrochemical double layer capacitance (EDLC) type positive electrode with a Li-ion battery type negative electrode—has been designed and fabricated.	-	-	-	•Reversible Specific Capacity •Rate Capability •Cycle Stability •Energy Density •Power Density	-	https://doi.org/10.1039/c3ee40509e	A hybrid supercapacitor demonstrates an ultrahigh energy density of 147 Wh kg-1.	A high-performance supercapacitor-battery hybrid energy storage device based on graphene-enhanced electrode materials with ultrahigh energy density
38			2022	Variji et al.	Metal foam	-	The application of phase change materials (PCM) can reduce the operating temperature and perform as a cooling mechanism.	-	-	-	•Heat Transfer Through PCM •Electrical Efficiency of PV- PCM Systems •Natural Convection Enhancement Through Liquid PCM •Average Temperature	-	https://doi.org/10.1016/j.est.2022.104690	The insertion of metal foam on the heat transfer through PCM and the electrical efficiency of PV-PCM systems has been numerically investigated.	Analysis of the effects of porous media parameters and inclination angle on the thermal storage and efficiency improvement of a photovoltaic-phase change material system
39			2022	Shahsavar et al.	Metal foam	Gradient boosting decision tree	The present paper deals with 3D numerical analysis of a battery thermal management system (TMS) including the Phase Change Material (PCM).	RMSE = 2.81E-06	5342	the fin tip and flow time parameters	•Heat Transfer Rate •Pcm Melting Time •Liquid Fraction •Fractional Entropy Generation Rate •Thermal Entropy Generation Rate	-	https://doi.org/10.1016/j.enganabound.2022.04.024	The optimum tip clearance space between the fin tips and the alumina enclosure is 0.5 mm.	The entropy generation analysis of the influence of using fins with tip clearance on the thermal management of the batteries with phase change material: Application a new gradient-based ensemble machine learning approach
40		Electrochemical-thermal	2020	Heyhat et al.	Metal foam	-	analyze the thermal performance of the passive thermal management system (TMS) of the 18,650 lithium-ion battery with application of phase change materials (PCM).	-	-	-	the thermal performance	It was assumed the nanoparticles were homogeneously dispersed in the PCM, but in a practical work because of agglomeration of nanoparticles, the use of nano-PCM is very challenging.	https://doi.org/10.1016/j.est.2020.101235	-	Battery thermal management with thermal energy storage composites of PCM, metal foam, fin and nanoparticle
41			2023	Boujelbene et al.	-	The ARIMA algorithm The XGBoost The Bayesian ridge algorithm, image processing	This study employed the XGBoost, the Bayesian ridge, and the SVR to optimize a new Li-ion battery arrangement cooling system design.	R^2=0.998	2811	Experimental data (temperature)	•Temperature1 •Temperature2	-	https://doi.org/10.1016/j.est.2022.106331	The Bayesian ridge algorithm performs perfectly for forecasting such models.	Machine-learning optimization of an innovative design of a Li-ion battery arrangement cooling system
42			2022	Wen et al.	-	(empirical mode decomposition) EMD-Kriging model	Flywheel energy storage system (FESS)	RMSE=0.0425	-	-	•Performance Degradation Monitoring Of The Rolling Bearing •Remaining Useful Life (Rul) Prediction Of The Rolling Bearing	-	https://doi.org/10.1016/j.est.2022.104072	-	A novel machine learning model for safety risk analysis in flywheel-battery hybrid energy storage system
43			2022	Chen et al.	-	different Machine Learning Methods	Hybrid Energy Storage Systems in Electric Vehicles	MSE=0.343	2000	power demand, vehicle speed, SOC, current, steering angle, and speed	•Efficiency Of a Hybrid Energy Storage Management System •Mean Square Error In All Strategies	Although deep learning-based energy management strategies are superior to rule-based strategies, two issues limit their use in practice. ,e first issue is the limited computation power of the vehicle’s CPU, which makes it necessary to install another computer on the vehicle to process the data. ,e second issue is collecting and storing the required information because deep learning requires subst…	https://doi.org/10.1155/2022/3693263	The proposed machine learning method can achieve the least mean square error in all strategies.	Development of Machine Learning Methods in Hybrid Energy Storage Systems in Electric Vehicles
44			2022	Blessie et al.	-	A machine learning framework with nested learning	Management of Hybrid Energy Storage Systems in e-Vehicles	-	-	•Total Operation Cost •Battery Replacement	HEV operating cost	-	https://doi.org/10.1155/2022/8270718	The proposed work shows a significant reduction of about 8%-10% in the operating cost when compared with the RL and rule-based policy.	Machine Learning-Based Management of Hybrid Energy Storage Systems in e-Vehicles
45			2018	Vidal et al.	-	feedforward backpropagation artificial neural network (BPNN)	Hybrid Energy Storage System State-of-Charge Estimation	RMSE=0.84%	2000	a set of five different homologation automotive drive cycles and tested on a sixth drive cycle known as worldwide harmonized light vehicles test cycle (WLTC) to compute the estimation accuracy	•State Of Charge (Soc) Of The Lithium Iron Phosphate (Lfp) Battery •State Of Charge (Soc) Of The Lead Acid (La) Battery	-	https://doi.org/10.1109/ITEC.2018.8450251	A machine learning approach known as feedforward backpropagation artificial neural network was developed to estimate the state-of-charge of both batteries using only one neural network structure.	Hybrid Energy Storage System State-of-Charge Estimation Using Artificial Neural Network for Micro-Hybrid Applications
46			2020	Yavasoglu et al.	-	neural network (NN)-based machine learning	energy management of multi-source (battery/UC/FC) powered electric vehicle	-	-	Instant features / Short term features / Long term features	•Extending Battery Lifetime •Utilizing Ultra Capacitor (Uc) And Fuel Cell (Fc) Effectively	-	https://doi.org/10.1002/er.5429	A neural network-based machine learning algorithm is proposed to solve multi-objective energy management problem.	Neural network-based energy management of multi-source (battery/UC/FC) powered electric vehicle
47	Combustion	combustion	2019	Jiang et al.	NaOH/KOH catalyzed straw pyrolytic carbon	Linear regression Support vector regression Random forest regression	KOH and NaOH were used as catalysts to prepare straw pyrolytic carbon (SPC) and the characteristics of combustion activation energy (AE) were analyzed by thermogravimetric analysis.	R^2=0.9834	100	adding mass percentage of NaOH, KOH and straw used to prepare SPC	•Combustion Activation Energy (Ae)	-	https://doi.org/10.1016/j.renene.2018.08.089	The RFR model was more suitable for the combustion activation energy prediction of alkalica-catalyzed straw pyrolytic carbon.	Prediction of combustion activation energy of NaOH/KOH catalyzed straw pyrolytic carbon based on machine learning
48			2022	Pourali and Esfahani	-	decision tree regression (DTR) model	an innovative combined approach, including machine learning for data generation (pre-processing), analytical techniques (processing), and response surface methodology (post-processing) is developed to investigate an integrated hydrogen production system.	R^2=0.984	600	Reformer inlet Temperature [K] Wall thickness [mm] Wall conductivity [W/ m.K] Reformer inlet velocity [m/s] Combustor inlet velocity [m/s] Reformer height [mm] Combustor height [mm] CH4 conversion (%) Quenching distance [mm]	•Ch4 Conversion •System Efficiency •Quenching Distance	-	https://doi.org/10.1016/j.energy.2022.124553	The wall thickness is the most influential parameter in CH4 conversion and system efficiency.	Performance analysis of a micro-scale integrated hydrogen production system by analytical approach, machine learning, and response surface methodology

## Sheet: Electrochemical devices
Paper No	Year	Authors	Porous Media type	ML model	Application	Evaluation metric	Data-set	Input	Key findings	Challenges/limitations	DOI	Notes	Title
1	2021	M. Erdem Gunay et al.	PEM electrolyzers	Classification and regression tree	electrolyzer	RMSE=0.18	789 data point	cathode and anode support, surface mole fraction, cathode and anode support/surface ratio, cathode and anode catalyst loading, cathode and anode gas diffusion layer type, electrolyte type concentrations, ionic membrane type, applied potential and operating temperature	other than current density and potential, cathode surface Ni mole fraction, anode surface Co mole fraction are the most important variables for the performance of an electrolyzer. the regression tree technique successfully modeled the polarization behavior with a RMSE (root mean square error) value of 0.18.		https://doi.org/10.1016/j.ijhydene.2021.10.191		Analysis and modeling of high-performance polymer electrolyte membrane electrolyzers by machine learning
2	2022	Yuxuan Lou et al.	Cathode catalyst layer	Data-driven model Extreme Gradient Boosting (XGBoost)	(PEMFCs)	RSME<0.05	1000 data group	Pt loading, Ratio of Pt on carbon-supported platinum, Ratio of ionomer to carbon supported platinum, Agglomerate radius, Carbon particle radius, Pt nanoparticle radius, Pore diameters, Thickness, Surface tension	the agglomerate radius, Pt loading, ratio of Pt on carbon and thickness of CCL are determined as the critical parameters for the multi-objective optimization. The optimized CCL improves the peak power density and limiting current density by 9.96% and 10.47%, respectively, while reducing the Pt loading by 28%.		https://doi.org/10.1016/j.jpowsour.2022.231827		Machine-learning-assisted insight into the cathode catalyst layer in proton exchange membrane fuel cells
3	2020	Guobin Zhang	proton exchange membrane	support vector machine (SVM)	PEMFC	R2	60 data set	fiber diameter, fiber distance, and output voltage, current density, etc.	data-driven surrogate model is effective in the design and optimization of porous media flow field. optimal porosity range is 0.71–0.83 due to the continuous variation trend of current density with porosity. SVM usage avoids the time-consuming and inefficient calculation of a large number of physical models. validated the applicability of the data-driven surrogate model in flow field design and o…	that SVM is sometimes over-trained, meaning over-fitting training data which produces poor prediction results. However, in comparison with the ANN method, the SVM performs better with this regard and is more suitable for small datasets.	https://doi.org/10.1016/j.enconman.2020.113513		Optimization of porous media flow field for proton exchange membrane fuel cell using a data-driven surrogate model
4	2022	Wei Xia	single atom catalysts	KNR, SVR, RFR	ORR catalysts	RSME, MAE	123 different carbon materials	carbon content, oxygen content, nitrogen content, BET surface area, ID/IG ratio, and fractions of pyrrolic, graphitic, pyridinic, and pyridinic–oxide nitrogens, were identified to represent the materials properties, while four descriptors (onset potential, half-wave potential, electron transfer number, and diffusion limiting current density	RFR outperformsbest ORR performance predication by considering two main descriptors (nitrogen content, BET surface area)		https://doi.org/10.1016/j.nanoen.2021.106868		Materials Informatics-Guided Superior Electrocatalyst: A Case of Pyrolysis-Free Single-Atom Coordinated with N-Graphene Nanomesh
5	2022	Hossein Pourrahmani	porous media inside the flow channels	ANN	PEMFC	MSE, Regression values	66 dataset	thickness, viscous resistance, and current density	voltage, power density, pressure drop, and Nusselt number can be optomized	Based on the theories and the existing models, the optimum condition is verified using the ECPEM, however, experimental efforts are required to confirm these optimum values.	https://doi.org/10.1016/j.applthermaleng.2021.117952		Evaluation Criterion of Proton Exchange Membrane (ECPEM) fuel cells considering inserted porous media inside the gas flow channel
6	2023	Jiankang Wang	porous gas diffusion layer (GLD)	ANN, RSM	PEMFC	average R2 and RSME	not told	compression ratio, channel/rib width ratio, porosity, thickness, and electrical conductivity of GLD	. Upon validation using average R2 and RSME, it was found that RSM demonstrated superior accuracy compared to ANN models when working with a limited dataset. However, as the training sample size grew, the prediction accuracy of ANN models surpassed that of RSM.	The accuracy of the ANN models is highly dependant on the number of data. they may not be the best choice for scenarios with fewer design variables.	https://doi.org/10.1016/j.egyai.2023.100261		Integration of multi-physics and machine learning-based surrogate modelling approaches for multi-objective optimization of deformed GDL of PEM fuel cells
7	2022	Hossein Pourrahmani	porous gas diffusion layer (GLD)	ANN	PEMFC	MSE, RSME, R2	300000 data points	GDL's permeability and porosity	higher values of GDL's porosity result in better maximum GDL liquid water removal. maximum GDL liquidwater removal by the changes in the permeability of the GDL showed that an optimization is needed to obtain the optimum value of the GDL permeability,	a comprehensive and detailed cost study should be done to figure out the needed expenses to reach the optimum values of the GDL's porosity and permeability, which are calculated in this study.	https://doi.org/10.1016/j.energy.2022.124712		Water management of the proton exchange membrane fuel cells: Optimizing the effect of microstructural properties on the gas diffusion layer liquid removal
8	2020	Bowen Wang	catalyst layer (CL)	SVM	PEMFC	RMSE, R2, mean percentage error, and maximum percentage error	65 dataset	Pt loading, Pt percentage and IC ratio of the anode and cathode CLs,	The efficient surrogate model has a comparable accuracy with the physical model and it can replace the physical model to predict the current density under different CL composition in the optimization process. optimal CL composition for maximizing the maximum power densityis achived and validated by physical model.		https://doi.org/10.1016/j.enconman.2019.112460		AI-based optimization of PEM fuel cell catalyst layers for maximum power density via data-driven surrogate modeling
9	2022	Hong-Wei Li	GLD	KLEM (Kernel Extreme Learning Machine)	PEMFC	mean square error (MSE), mean absolute percentage error (MAPE), and coefficient of determination (R2).	the training set (sixty percent of the data), the validation set (twenty percent of the data) and the testing set (twenty percent of the data).	operating parameters (cell voltage, oxygen flow rate, operating pressure) and geometric parameters (GDL thickness, porosity)	KELM exhibited superior generalization ability, rapid convergence, and eliminated the need for manual parameter adjustment and local optimal solutions, providing a notable advantage in handling low-dimensional data. The proposed model determined optimal values for various parameters, resulting in a significant maximum power density		https://doi.org/10.1016/j.enconman.2022.116338		A data-driven framework for performance prediction and parameter optimization of a proton exchange membrane fuel cell
10	2021	Taylr Cawte	GLD	support vector regression (SVR), decision tree regression (DTR), gradient boosting regression (GBR), random forest regression (RFR), K-neighbours regression (KNR), an artificial neural network (ANN), and elastic net (ELN).	PEMFC	MAE, R2	228,000 examples single phase and 60,489 examples for multiphase	the number of cylinders, cylinder radius, average porosity, maximum out-plane rotation, maximum in-plane rotation, and the water contact angle. Additional features for the multiphase transport predictions were the saturation and corresponding applied pressures.	Gradient boosting regression (GBR), artificial neural network, and support vector regression were the best performing predictors of the single-phase properties, all of which exhibited statistically insignificant differences in error. GBR provided the best prediction accuracy of relative transport properties. For single phase properties, the most important features (as discussed above) are the por…		https://doi.org/10.1002/elsa.202100185		Accurately predicting transport properties of porous fibrous materials by machine learning methods
11	2023	M. Erdem Günay	anode gas diffusion layer type	local interpretable model-agnostic explanations (LIME), neural network pattern recognition association rule mining (ARM)	PEM electrolyzer	Cross entropy error	789 data items	cathode support elements, cathode support to surface ratio, cathode surface elements, cathode catalyst loading, cathode gas diffusion layer type, anode support elements, anode support to surface ratio, anode surface elements,anode catalyst loading, anode gas diffusion layer type	LIME methodology indicated positive effect of certain variables on the performance like Pt, Ru anode surface elements, K2CO3 or KOH concentration in the electrolyte or certain membrane types and gas diffusion layers, etc. the rules for high performance extracted from ARM showed that the rules were dominated by ELAT (cathode gas diffusion layer), cathode support to surface ratio: 24.39, pure Pt ca…		https://doi.org/10.1016/j.egyai.2023.100254		Analysis of PEM and AEM electrolysis by neural network pattern recognition, association rule mining and LIME
12	2022	Guoping Xu	Anode, cathode, and electrolye	Artificial Neural Network (ANN), Probabilistic Graphical Models (PGMs), Boltzmann Machines (BMs), Support Vector Machines (SVMs), Association Rules (AR), Decision Trees (DT) and other ensemble methods, such as Gradient Boosting (GB) and Random Forests (RF)	Solid oxide fuel cells (SOFCs)	MAE, R2	100 data set	Microstructure (Anode, cathode, and electrolyte porosity), operating conditions (Temperture, pressure, Anode and cathode mass flow rate,and Molar fractions of H2), and Geometry (ASL thickness and channel width)	The algorithms with high R2 values greater than 0.98 are Matern 5/2 GPR, Rational Quadratic GPR and Artificial Neural Network (ANN). However, Coarse Tree has the minimum R2 of 0.85. And the ANN gives the highest accuracy (R2 = 0.99894) of predictions of the power density. ANN surrogate model has a comparable accuracy and time-saving feature compared with the CFD model. The current density derived…		https://doi.org/10.1016/j.enconman.2022.116026		Performance improvement of solid oxide fuel cells by combining three-dimensional CFD modeling, artificial neural network and genetic algorithm
13	2022	Xuhao Liu	Anodes	convolutional neural network (CNN)	Solid oxide fuel cells (SOFCs)	MAPE, R2	1961 IMAGES	inputs: Ni% and porosity. outputs: elastic modulus (E), Poisson’s ratio (υ), shear modulus (G) and coefficient of thermal expansion (CTE) triple-phase boundary length density (LTPB)	the relationships between microstructures and the effective macroscopic properties of Ni-YSZ anodes were analyzed the porosity has a great influence on the elastic properties, while the elastic properties seem to be independent of the Ni %. the effect of Ni% on CTE is large, but the porosity has almost no significant effect	they predicted only five effective macroscopic properties.	https://doi.org/10.1016/j.egyai.2021.100122		Correlation between microstructures and macroscopic properties of nickel/yttria-stabilized zirconia (Ni-YSZ) anodes: Meso-scale modeling and deep learning with convolutional neural networks
14	2020	Elvis Osamudiamhen Ebikade	Nitrogen doped metal-free carbon catalysts	regression, principal component analysis, partial least squares	hydrogen evolution reaction	MAE	-	dataset consists of 9 features; six are the structural features (BET surface area, micropore volume, crystallinity, graphitic nitrogen content, pyridinic nitrogen content, and pyrrolic nitrogen content) and three are the synthesis conditions (final temperature, hold time, and heating rate).	The co-optimization results suggest that low synthesis temperature and NDC catalysts with high crystallinity are important towards maximizing HER performance by having relatively higher heating rates and longer final hold times.		DOI: 10.1039/d0re00243g		Active learning-driven quantitative synthesis– structure–property relations for improving performance and revealing active sites of nitrogen-doped carbon for the hydrogen evolution reaction†
15	2022	Mostafa Pourali	porous catalytic shell and tube reactor	ANN	Ammonia decomposition	mean square error(MSE)	287	pore diameter, porosity, tube convection coefficient, reactor inlet temperature and velocity, tube inlet temperature and velocity, and foam thermal conductivity. OUTPUTS:ammonia conversion, system efficiency, hydrogen mass flow rate, and pressure drop along the reactor.	the reactor inlet velocity and tube inlet temperature are best suited to control system efficiency and ammonia conversion. The main determinants of the hydrogen flow rate and pressure drop were also the reactor inlet temperature and porosity, respectively. In addition, it was found that increasing convective heat transfer in the tube when the heating tube temperature is low (750 K) has a greater …		https://doi.org/10.1016/j.est.2022.105804		Ammonia decomposition in a porous catalytic reactor to enable hydrogen storage: Numerical simulation, machine learning, and response surface methodology
16	2019	Ahmed M. Nassef	porous anode support layer	ANN	Solid oxide fuel cells (SOFCs)	mean squared error (MSE	538 points.	Current density, Temperature, Electrolyte thickness, (anode support layer) ASL thickness, ASL porosity and cathode thickness, while the voltage is taken as its output variable.	the optimal SOFC parameters for ASL thickness, ASL porosity, electrolyte thickness, and cathode thickness were achived. By using the proposed method increases the maximum power density by 33.8% and 17.28% over the experimental and GA method. the ANN and RMO optimizer are succeeded to model the SOFC perfectly		https://doi.org/10.1016/j.renene.2019.01.072		Maximizing SOFC performance through optimal parameters identification by modern optimization algorithms
17	2023	Neil Vaz	cathode catalyst layer	MLP	PEMFC	RSME, R2	85 sample points	Four essential cathode CL parameters, i.e., platinum loading , weight ratio of ionomer to carbon, weight ratio of Pt to carbon, and porosity of cathode	the optimal values of the cathode CL parameters were successfully obtained to maximize the cell performanceThe optimization process led to significant cost reduction by minimizing Pt usage and simultaneously resulted in noteworthy improvements in single-cell voltage.		https://doi.org/10.1016/j.jechem.2023.02.027		Multi-objective optimization of the cathode catalyst layer micro-composition of polymer electrolyte membrane fuel cells using a multi-scale, two-phase fuel cell model and data-driven surrogates
18	2023	Yang Wang	porous anode	SVM	solid oxide electrochemical cells (SOCs)	MSE, R2	48 dataset	volume fractions of NiO, YSZ, and pore former phases (VFNiO, VFYSZ, and VFPF) and the initial average particle size (PS, average particle radius) of NiO and YSZ phases (PSNiO and PSYSZ), which are the electrode fabrication parameters. OUTPUT is overpotential	The model demonstrates fast and accurate prediction of the electrochemical performance of heterogeneous porous electrodes. Specifically, the volume fractions of YSZ are identified as a crucial factor influencing the overall overpotential.		https://doi.org/10.1016/j.scib.2023.02.019		Boosting the performance and durability of heterogeneous electrodes for solid oxide electrochemical cells utilizing a data-driven powder-to-power framework
19	2020	Ahmed Fathy	porous anode support layer	ANN	SOFCs	MSE	23 dataset	current density, cell temperature, thickness of ASL, porosity of ASL, electrolyte thickness, CFL thickness and voltage	ANN based SOFC polarization curves are compared to experimental data under variable conditions. Four parameters are selected as designvariables, ASL thickness, ASL porosity, electrolyte thickness and CEL thickness, identified via the proposed MFO to maximize the cell output power. GA and SSO are programed to optimize ANN based SOFC and the obtained results from them are compared to the proposed M…		https://doi.org/10.1016/j.energy.2020.118326		Recent moth-flame optimizer for enhanced solid oxide fuel cell output power via optimal parameters extraction process
20	2022	Xuanchen Liu	POROUS catalyst layer	deep convolutional generative adversarial network (DCGAN) deep learning	PEMFC	-	600 images	porosity, particle size distribution, and tortuosity.	This approach enables the 3D reconstruction and analysis of the reconstructed structure even in the absence of FIB-SEM sectional images. Thus, it has the potential to greatly reduce the cost of fuel cell CL structure analysis and facilitate CL structure design and optimization.		https://doi.org/10.1016/j.powera.2022.100084		3D generation and reconstruction of the fuel cell catalyst layer using 2D images based on deep learning
21	2023	Anna Sciazko	porous anodes	U-net neural network	solid oxide fuel cell	-	-	information from lower and EsB detectors. the network was trained to detect pores, which corresponds to artificial resin infiltration. Secondly, the segmentation network recognized all phases. The patch sizes of 256 × 256 pixels and 512 × 512 pixels were used to train the networks for mild and severe samples	The proposed method eliminates the necessity of resin infiltration of porous samples. carbon deposited uniformly along the electrode thickness direction in the mild condition anode. The carbon deposition caused decrease in pore size, but did not block the pores completely. The mild carbon deposition does not influence the active triple phase boundaries which is in good agreement with the performa…		https://doi.org/10.1016/j.cej.2023.141680		3D microstructures of solid oxide fuel cell Ni-YSZ anodes with carbon deposition
22	2020	Satjaritanun	Porous Transport Layers	-	Polymer Electrolyte Water Electrolyzers	-		PTLs feature three phases: fiber, water and oxygen	Weka machine learning incorporated with the Z project method was able to quantify oxygen content throughout the PTLs via post-processing of operando X-ray CT scans. Oxygen content in the PTL varied very little with either flow rate or current density, within the studied range. this is the first time oxygen content has been directly observed and quantified on a pore scale with direct observations	The study was applied to a single type model PTL. Additional investigations are needed to generalize the findings and to ensure that these are translatable across the families of the PTLs. Future modeling study needs to incorporate the temperature effects and electrochemical kinetics to better capture transport effects on the oxygen transport behavior inside the PTLs.	https://doi.org/10.1016/ j.isci.2020.101783		Observation of Preferential Pathways for Oxygen Removal through Porous Transport Layers of Polymer Electrolyte Water Electrolyzers
23	2021	Anhui Zheng	Pt/carbon electrocatalysts	gradient boosting regression (GBR)	electrocatalysts fo H2	MAE, MSE	200 sets	the characters of Pt (e.g. content and particle size), the details of carbon support (e.g. specific surface area, N-doped level, ID/IG, and pore volume), the information of test system (e.g. electrolyte, test current density, and mass loading), and the corresponding catalytic performance (e.g. overpotential, mass activity, turnover frequency).	the impacts of factors were quantitatively analyzed to form guidance for catalyst synthesis. Among various features, the Pt content and Pt size have the greatest influence on the performance of catalysts. Based on the ML outcome, a nitrogen-doped mesoporous carbon network prepared by salt template was used as the confined support to fabricate the content-controllable and size-controllable Pt nano…	Also, it needs to be mentioned that the data collection cannot cover all influence factors, which leaves room for future completion. the analysis given by ML is not detailed, because the current amount of data and the features are not enough to support a precise model.	https://doi.org/10.1016/ j.isci.2021.103430		Data-driven design and controllable synthesis of Pt/carbon electrocatalysts for H2 evolution
24	2023	Yulong Chen	elective catalytic reduction (SCR) of nitrogen oxides (NOx)	ANN)	electrocatalysts fo H2	RMSE,R2	2748	62 independent variables including the pore size, pore volume, and specific surface area.	A new catalyst with the molar ratios of Fe0.319Mn0.206Ni0.475 was identified from the retrained ML model. the optimal pore size, specific surface area, and pore volume were achieved.		https://doi.org/10.1021/acs.est.3c00293		Iterative Approach of Experiment−Machine Learning for Efficient Optimization of Environmental Catalysts: An Example of NOx Selective Reduction Catalysts
25	2020	Changhee Song	porous anode	ANN	SOFCs	MSE)	525 data	current density, temperature, electrolyte thickness, anode thickness, anode porosity, and cathode thickness	major design parameters of SOFC were optimized by utilizing MAB in order to derive the best combination of four design parameters.		doi:10.3390/en13071621		A Study of Anode-Supported Solid Oxide Fuel Cell Modeling and Optimization Using Neural Network and Multi-Armed Bandit Algorithm
26	2022	Mohammad Hossein Golbabaei	porous anode support	linear regressor, K- nearest neighbors regressor, support vector regressor, random forest regressor, gradient boosting regressor, Gaussian process regressor, and multilayer perceptron regressor.	SOFCs	R2, MSE.MAE	403	working temperature, anode support layer (ASL) thickness, ASL porosity, electrolyte layer (EL) thickness, cathode functional layer (CFL) thickness, and the current density	The multilayer perceptron regressor showed the highest R2 score among the aforementioned models and the lowest mean absolute and squared error.		https://doi.org/10.3390/ma15217760		Performance Analysis of Anode-Supported Solid Oxide Fuel Cells: A Machine Learning Approach
27	2021	Wei Zhou	COF electrocatalyst	GBR regression	porous electrocatalyst	RSME, R2	100	23 initial features such as the ionic radii, electronegativity, electron affiliation energy, and first ionization energy of the metal	ML predicted the best structure with OER performances. One of the predicted structures with a Ni− N2O2 unit is subsequently employed to synthesize the corresponding Ni−COF.		https://doi.org/10.1021/jacsau.1c00258		In Silico Design of Covalent Organic Framework-Based Electrocatalysts
28	2022	Simon et al.	Carbon cloth and carbon paper for electrode (AvCarb 1071, AvCarb 7497, Freudenberg H23, AvCarb MGL370)	Trainable Weka 3D Segmentation plugin, which is a machine learning tool that uses a number of user-defined regions to train a classifier.	Image segmentation for Electrode microstructure in RFB				1. Electrode permeability correlates best with electrode performance. 2. Distinct inter- and intra- pore transport processes effect on performance metrics. 3. Combined complementary experimental/modelled analysis of flow through electrodes. 4. Carbon cloth electrodes display best permeabilities and mass transport coefficients. 5. Custom Weka three-dimensional segmentation technique for improved i…	1. Small sample size: The sample size for training the classifier is limited (370*370 voxels and five regions on only 3 images out of the full stack size of 1400*140). 2. Use of SEM images as ground truth to adjust the fiber thickness	https://doi.org/10.1016/j.apenergy.2021.117678		Combining electrochemical and imaging analyses to understand the effect of electrode microstructure and electrolyte properties on redox flow batteries
29	2021	Wan et al.	Artificial electrode used in RFB, graphite felt (Sigracell SGL Carbon, GFA-6-EA graphite felt; (2) Sigracell SGL Carbon, GFD-4.6-EA graphite felt; (3) Liaoning Jingu Carbon Material, graphite felt)	1. Linear regression model, artificial neural networks (ANN) and random forests (RF); 2. genetic algorithm NSGA-II	systematic identification of the optimal electrode structures for RFBs	Error of predicting specific surface area and hydraulic permeability R-squared (R2), mean absolute percentage error (MAPE) and root-mean-squared error (RMSE)	2275	Electrode microstructure	It is concluded that it is possible to estimate the specific surface area and hydraulic permeability very accurately by simply using the four structural parameters (fiber diameter, electrode porosity, in-plane orientation factor, and through-plane orientation). The fiber diameter and electrode porosity of optimized microstructure exhibit a triangle-like joint distribution, with a preference for f…	1. Artificial microstructures were used as the input of the machine learning model that can be sometimes far from reality and results an ideal, non-physical structure. 2. There are two assumptions in the microstructure generation that limits the generalizability of the work, a. the crosssection of fibers is round, and b. the curvature of fibers is negligible	https://doi.org/10.1016/j.apenergy.2021.117177		A coupled machine learning and genetic algorithm approach to the design of porous electrodes for redox flow batteries
30	2023	van Gorp	An artificial electrode used in RFB given the pore size distribution of Freudenberg paper H23	genetic algorithm	Microstructure optimization for RFB				The genetic algorithm manipulates the pore and throat size distributions of an artificially generated microstructure with fixed pore positions by selecting the best-performing networks, based on the hydraulic and electrochemical performance computed by the model. The algorithm generates structures with improved fluid distribution through the formation of a bimodal pore size distribution containin…	1. The resulting optimized microstructure may not be realistic and manufacturable. 2. The optimization was only limited to the pore and throat size variation. The relocation of pore coordinates could also be considered.	https://doi.org/10.1016/j.cej.2022.139947		Bottom-up design of porous electrodes by combining a genetic algorithm and a pore network model
31	2020	Bao	Machine Learning Coupled Multi-Scale Modeling for Redox Flow Batteries	deep neural network		root mean square error (RMSE)	128	inlet velocity, inlet concentration, and electric current density	Based on the multi-scale model results, a time-varying optimization of electrolyte inlet velocity is established, which leads to a significant reduction in pump power consumption for targeted surface reaction uniformity but little reduction in electric power output for discharging.	1. Limited number of simulations (data-set) could have an adverse effect on the generalizability of the outcome	https://doi.org/10.1002/adts.201900167		Machine Learning Coupled Multi-Scale Modeling for Redox Flow Batteries
32	2023	Patil et el.	poly(acrylonitrile) (PAN) membrane for RFB	Bayesian Optimization	Optimizing the membrane performance for RFB		204	laser scan speed, laser power, focal point height (Z), and image density (ID)	synthesize laser-reduced PAN with a low sheet resistance (6.5 Ω sq−1) in a single lasing step. The resulting materials are tested electrochemically, and their applicability as membrane electrodes for vanadium redox flow batteries is demonstrated. This work also demonstrates the ability for laser-annealing to create PAN derived electrodes without an energy-intensive high temperature carbonization …	1. The optimized parameter set is system specific. 2. The thickness of the electrode is a limiting factor in this process	https://doi.org/10.1021/acsnano.2c12663		Bayesian-Optimization-Assisted Laser Reduction of Poly(acrylonitrile) for Electrochemical Applications
33	2021	Li et al.	polybenzimidazole (PBI) membranes used in RFBs	linear regression and articial neural network (ANN)	solvent treatment to develop membranes with high ion selectivity, proton conductivity and low cost for VFBs	mean absolute prediction error (MAPE)	49	Solvent properties (boiling point, melting point, surface tension, dielectric constant, density, heat capacity, viscosity, dipole moment and heat of evaporation), combined with 5 experimental parameters (PBI concentration, solvent soaking time, solvent volatilization time, volatilization temperature, and current density)	The predicted performance [voltage efficiency (VE) and energy efficiency (EE)] for a PBI membrane in a vanadium flow battery (VFB) can achieve a mean absolute prediction error (MAPE) within 1%. It was proved that alcohols are the most suitable solvents for solvent treatment of porous PBI membranes, due to similar polarity and strong interaction between alcohols and the PBI segment, which was conf…	1. Relatively small data set 2. Limited number of solvents in the data set may affect the generalizability of the model	https://doi.org/10.1039/D1TA02421C		A data-driven and DFT assisted theoretic guide for membrane design in flow batteries
34	2023	Duquesnoy et al.	LIB electrode	regression functions, Sure Independence Screening and Sparsifying Operator (SISSO) algorithm, Basian optimization	"Li-ion battery- simultaneous minimization of the electrode tortuosity factor and maximization of the effective electronic conductivity, the active surface area, and the density, all being parameters that affect the Li+ (de-)intercalation kinetics, ionic, and electronic transport properties of the electrode"	RMSE	174	Manufacturing parameters including active material (AM%), slurry solid content (SC%), and the calendering compression degree (CD%, referring here to the percentage of electrode thickness reduction versus the initial thickness)	It was found that the tortuosity factor, the electronic conductivity, the active surface area, and the density are bound to each other simultaneously, with the highest electrode performance expected under balanced properties.	1. They only relied on the simulation data as an input that can limit the applicability of the produced model in real applications. 2. Limited volume of data-set imposes restrictions on the generalizability of the model. 3. The simulation part does not include all the steps of the manufacturing process which is limiting the applicability of the work.	https://doi.org/10.1016/j.ensm.2022.12.040		Machine learning-assisted multi-objective optimization of battery manufacturing from synthetic data generated by physics-based simulations
35	2022	Xu et al.	LIB electrode	machine learning segmentation plugin Trainable Weka in ImageJ. Fast Random Forest class	Image segmentation of the electrode material				The model links the manufacturing parameters with the real microstructure of the electrodes and to better observe the effect of the former on the heterogeneity of the electrodes.		https://doi.org/10.1016/j.jpowsour.2022.232294		Lithium ion battery electrode manufacturing model accounting for 3D realistic shapes of active material particles
36	2023	Bailey et al.	two calendered Li-ion NMC cathodes (Toda NMC532: 1-CAL and 2-CAL) and two calendered Li-ion graphite anodes (Conoco Phillips A12 Graphite: 5-CAL and 6-CAL)	ML semantic segmentation, using open-source software, Ilastik	identify the optimised methodology that minimises variation in active material volume fraction quantification	This approach is applied to lab-based X-ray CT data and compared with data obtained by focused-ion beam/scanning electron microscopy slice-and-view tomography			Iterative, manual training across seven cross-sectional slices (<5%) of a tomogram is identified as an optimal balance between variance and user interaction, where 10–25% of each slice was trained. It provides an optimised approach for using open-source software to apply machine-learning segmentation when quantifying active material volume fractions in cutting-edge LIB electrodes. Variation betwe…		https://doi.org/10.1016/j.jpowsour.2022.232503		Quantitative assessment of machine-learning segmentation of battery electrode materials for active material quantification
37	2022	Fu et al.	Polymer nanocomposite with low volume fraction of secondary phase, Clustered isotropic microstructure, Porous media with wide pore size range, Porous media with long-distance connectivity, Anisotropic microstructure, Synthetic silica with high porosity, Multiphase porous electrode microstructure	artificial neural networks (ANN), scaled conjugate gradient (SCG) method	Construct 3D microstructures from limited morphological information of 2D cross-sectional images			2D images	the proposed method provides a highly cost-effective and widely applicable way to reproduce 3D realizations that precisely preserve the statistical characteristics, geometrical irregularities, long-distance connectivity and anisotropy that exist in 2D cross-sectional images. For all testing cases, the proposed method possesses the best performance in preserving microstructural complexities, inclu…		https://doi.org/10.1016/j.cma.2021.114532		Stochastic reconstruction of 3D microstructures from 2D cross-sectional images using machine learning-based characterization
38	2021	Tong et al.	LiFePO4/graphite and LiNi0.8Co0.15Al0.05O2/graphite batteries	deep-learning-based prediction algorithm, ADLSTM-MC		root mean square error (RMSE) and mean absolute error (MAE)	6	the EOL of each battery is set at the moment that battery capacity declines to 72% of the nominal capacity. The dataset of six batteries under different current rates and cut-off voltages was utilized to validate the proposed model.	The ADLSTM-MC method is shown to precisely achieve early prediction with only 25% of the entire degradation data, while existing models typically require 40%–70% of the degradation data. By utilizing 25% of the degradation data, the proposed ADLSTM-MC method can predict RUL with an error of less than 4%.	The drawback of the proposed method is the computational efficiency of the employed LSTM network that needs to be greatly improved especially for real-time battery management system	https://doi.org/10.1016/j.jclepro.2021.128265		Early prediction of remaining useful life for Lithium-ion batteries based on a hybrid machine learning method
39	2022	Jiang et al.	graphite/ LiCoO2 battery	Basian Optimization (BO)	Reducing the charging time				A machine learning strategy is proposed for optimizing rapid charging protocols. The strategy explicitly includes constraints that limit battery degradation. The approach converges more quickly than other published optimization strategies. The performance is quantified for varying number of current steps in the protocol. Three CC-step protocol charged 126.6 s and 14.0 s faster than the one and tw…	The first-principles electrochemical model used has some limitations such as computational cost, limited applicability, simplified assumptions, lack of experimental validations.	https://doi.org/10.1016/j.apenergy.2021.118244		Fast charging design for Lithium-ion batteries via Bayesian optimization
40	2021	Shodiev et al.		multi-layers perceptron (MLP) approach	Prediction of electrolyte infiltration inside the electrode	mean square error (MSE)		geometrical properties of the pores (including pore volume, pore surface, pore contact surface area, pore contact ratio, pore location) and applied pressure	Simulation data was used to train a machine learning model. The machine learning model was able to predict electrolyte infiltration in 3D. The trained MLP can generalize the flow problems to predict the rate of saturation and filling time in porous electrodes. Moreover, it can predict the direction of the electrolyte flow, total saturation, and filling time of the electrode accurately Predictions…	1. limited input features: there can be other geometrical parameters that control or affect the fluid distribution in the electrode that have no been included here. 2. The method only relies on the simulated data which may not fully capture the complexity of real-world systems.	https://doi.org/10.1016/j.jpowsour.2021.230384		Machine learning 3D-resolved prediction of electrolyte infiltration in battery porous electrodes
41	2023	Nagda et al.	Calendared and uncalendared samples. The cathode was composed of Lithium-NickelManganese-Cobalt-Oxide (LiNiMnCoO2), Super C65 carbon black, and Kynar 761 binder (polyvinylidene fluoride)	.deep learning-based U-Net architecture. (StarDist for the segmentation of active particles)	geometric characterization analysis, and stochastic reconstruction of electrode microstructure			labelled images using watershed thresholding	The employment of Artificial Intelligence (AI) based active particle identification and segmentation enabled rapid and accurate characterization of the electrode microstructure.		https://doi.org/10.1016/j.commatsci.2023.112139		Image-based 3D characterization and reconstruction of heterogeneous battery electrode microstructure
42	2022	Yang et al.	NCM (LiNi1− x− yCoxMnyO2), 4% SiOx–graphite composite electrodes and a Celgard separator were used as the positive and negative electrodes and the separator, respectively	convolution neural network (CNN), Modified U-Net	enhance the quality of the evolution of electrode microstructure	the Dice, Mean Pixel Accuracy (MPA), and Mean Intersection over Union (MIoU) coefficients, and the area similarity ratio		2d SEM images	an image segmentation method based on a modified U-Net neural network is developed to enhance the quality of the extracted microstructure. The relationship between porosity and thickness at different states of electrode charge is presented through experiments and deep learning of images		https://doi.org/10.1016/j.elecom.2022.107224		Microstructure evolution of lithium-ion battery electrodes at different states of charge: Deep learning-based segmentation
43	2023	Goel et al.		particle swarm optimization (PSO)	optimize Highly Ordered Laser-patterned Electrode (HOLE) architectures for fast-charging (4C and 6C) of Li-ion batteries			experimentally obtained voltage vs. capacity data for galvanostatic charging of a three-electrode cell with the control anode (the unmodified anode design) at six different C-rates (0.1C, 0.5C, 1C, 2C, 4C, and 6C)	While closer (and smaller) channels generally result in improved fast-charging performance compared to those with larger spacings and diameters, there exists an optimal spacing below which the marginal gain in the performance falls rapidly. Define the second Damkohler number, Da2, as a metric to quantify the effect of the channel size/spacing on the electrode performance and to provide a metric f…	1. Continuum modelling overlooks the pore-scale changes. 2. Small dataset	https://doi.org/10.1016/j.ensm.2023.01.050		Optimization of laser-patterned electrode architectures for fast charging of Li-ion batteries using simulations parameterized by machine learning
44	2022	Ishikawa et al.	Cathode and Anode of LIB	convolutional neural network (CNN), nonlinear regression based on support vector regression (SVR)	Estimation of the tortuosity of the electrode	mean squared error (MSE)	500	three dimensional porous structure	The tortuosity was predicted by performing image analysis using a convolutional neural network (CNN) for the positive electrode and nonlinear regression based on support vector regression (SVR) for the negative electrode. The findings suggested that the tortuosity, which was previously considered to be only a function of the porosity, was also correlated with the particle aspect ratio.	1. Using simulated electrode porous structures for machine learning model may not represent the complexity of the real microstructure. 2. The Presence of carbon black and binder was neglected in the microstructures	https://doi.org/10.1016/j.powera.2022.100094		Simulation to estimate the correlation of porous structure properties of secondary batteries determined through machine learning
45	2023	El Malki	NMC111-based LIB electrode	RF: Random Forest, NN: Neural Networks, SVM: Support Vector Machine	optimize the electrolyte infiltration conditions, such as electrolyte properties and filling conditions (pressure)	mean squared error,		Kinematic viscosity of the electrolyte, Contact angle, Pressure, Electrolyte/air density ratio	Exploratory data analysis (EDA) helped to find the most influential electrolyte parameters on the saturation descriptors. In fact, the lower the kinematic viscosity is, the higher wetting degree and wetting rate are, the higher inlet applied pressure reduces the electrolyte filling time for both microstructures. The models implemented in this work were tested on unseen data to validate the proces…		https://doi.org/10.1016/j.powera.2023.100114		Machine learning for optimal electrode wettability in lithium ion batteries
46	2022	Niri et al.		gradient boosted trees and random forests	Identify key parameters in anode and cathode manufacturing process	mean squared error (MSE), root mean squared error (RMSE) and mean absolute error (MAE)	96 Cathose, 75 Anode	Three coating process factors of comma bar gap, coating speed and coating ratio	A data driven approach to predict the quality of Li-ion electrodes (anode and cathode). Identifying the key parameters and control variables affecting the intermediate and final products of battery electrode manufacturing process. Quantifying the effect of key control variables on the electrode and cell characteristics. Systematic design of experiments to generate representative data for ML activ…	1. Limited number of experiments (data-set) could result in biased results. 2. Limited parameters have been considered in the ML model.	https://doi.org/10.1016/j.egyai.2021.100129		Quantifying key factors for optimised manufacturing of Li-ion battery anode and cathode via artificial intelligence
47	2022	Kabra et al.	Li-ion battery graphite anode electrode	supervised learning models fall into three categories: Linear (Linear, Lasso, Ridge, ElasticNet), Decision tree, and Ensemble (Adaboost, Gradient Boost) based models	rapid characterization of electrode microstructural effective properties	mean absolute error (MAE), coefficient of determination (R2), relative error prediction	∼17000	1. composition includes the volume fraction of various components including the active material phase, conductive-binder phase, conductive-binder phase morphology, and overlap factor. 2. active material shape 3. mean pore size 4. orientation of active material particles and their degree of alignment in a particular direction.	The mesoscale ML analytics based on porous electrode microstructural characteristics achieves prediction accuracy of more than 90% for effective property estimation.	1. relying only on the artificially constructed porous electrode may not be able to estimate properties of the complex real electrode.	https://doi.org/10.1021/acs.jpcc.2c04432		Mesoscale Machine Learning Analytics for Electrode Property Estimation
48	2022	Niri et al.	Anode and Cathode of LIB electrode (Cathode samples are based on Li(Ni0.5Mn0.3Co0.2)O2, (NMC532), and for their associated half-cells, the lithium foils with 99.9% purity have been used for the anode. )	neural network (NN)	reconstructing the microstructures based on a deep learning network of autoencoder-decoders.	mean squared error (MSE)	7	Images of Cathode and Anode electrode	The framework is based on an auto-encoder decoder for microstructure reconstruction and feature extraction. It helps to reduce the microstructure information dimension while preserving its characteristics for prediction purposes. The results show that the convolutional auto-encoders can be further optimised by including other computational layers, such as pooling layers (which reduces the number …	1. The model did not produce realistic reconstructions and more data was required to achieve that.	https://doi.org/10.3390/ en15124489		Performance Evaluation of Convolutional Auto Encoders for the Reconstruction of Li-Ion Battery Electrode Microstructure
49	2022	Kamrava	nickel-manganese-cobalt (NMC_ cathodes	deep learning (DL) method based on a convolutional neural network	build 3D models of heterogeneous materials using 2D images		2	2D images	Given that this model needs only 2D images while being trained, the main advantage of it is in its higher speed and lower computational cost with respect to direct 3D generative models. The proposed method can capture the granular-like morphology of the battery system and there is a good agreement between the original and synthetic models.	1. The resulted 3D microstructures had a different pore size distribution, permeability and thermal conductivity.	https://doi.org/10.1103/PhysRevE.106.055301		End-to-end three-dimensional designing of complex disordered materials from limited data using machine learning
50	2022	Sun et al.	graphite|LiMn2O4 Electrode	convolution neural network (CNN)	predictions of Bruggeman’s exponent and shape factor from voltage–capacity curves	R squared	14000	Voltage-capacity curve	The expected or true α and S values against the neural network predictions, showing a 99% model explained variance.	1. The deviations between model and experiment are a result of model limitations unable to capture the particle-particle effects that result at high current densities. 2. The model was unable to predict the performance of highly aligned (textured) platelets, with morphological anisotropy	https://doi.org/10.1038/s41598-022-16942-5		Artificial intelligence inferred microstructural properties from voltage–capacity curves
51	2022	Ahmed G. Saad et al.	Graphene doped electrode	k-nearest neighbors' regression (KNN), decision tree regression (DTR), Bayesian ridge regression (BRR), and artificial neural network (ANN) . opensource sci-kit learn	supercapacitors	R squared (0.88), RMSE (60.42)	200	over 200 research experimental publications, taking 15 input parameters. 80% train and 20% test. specific surface area, potential window, current density, pore volume, nitrogen, oxygen and carbon %, ratio of ID/IG, Electrode configuration, Electrolyte ionic conductivity, Electrolyte concenration, Cell configration, Charge-Transfer Resistance, Equivalent Series Resistance.	atomic composition of nitrogen and oxygen in doped graphene had greatest effect on the ANN model	1. macropore size with small pore volume decreased the specific capacitance prediction which is not in agreement with theory 2. high model accuracy requires reliable and a lot of data	https://doi.org/10.1016/j.est.2022.105411	used data gathered from published literature, reliability in results not known	Data-driven machine learning approach for predicting the capacitance of graphene-based supercapacitor electrodes
52	2019	Zhou et al.	carbon electrode supercapacitors, EDL capacitors due to high surface area, high porosity and low cost	(A) generalized linear regression (GLR), (B) sup- port vector machine (SVM), (C) random forest (RF), and (D) artificial neural network (ANN).	supercapacitors	R squared (0.638), RMSE (0.95)	70 for training	BET Surface area of micro pores, surface area of mesopores, scan rate	Provide quantative correlations between microstructure of carbon electrodes and the operando energy and power density. Predicts specific capacitance and power density. 2. AN resulted in the best performance, balance between meso and micro porous areas is required for different scan rates for the best specific capacitance	physics based modelling are valid near equalibrium but performance depends on properties far from that. 2. some machine learning models, linear regression, support vector machine and random forest did not produce good correlation for specific capacitance.	https://doi.org/10.1016/j.carbon.2019.08.090	interconnected pore network and surface areas, ion diffusion important for specific capacity	Insights from machine learning of carbon electrodes for electric double layer capacitors
53	2022	Rahimi et al.	supercapacitors	ANN, MLP-NN and genetic algorithm to optimise specific capacitance based on the model	Activated carbon based electrodes	R squared, RMSE, MAPE and TSSE	400 raw datasets, with 259 defect free datasets were screened for detailed values of inputs. Dervied from previous experimental studies in 6 M KOH, three electrode configuration	operating conditions: Potential range, current density sturcutral features: micropore surface area, micropore volume, total pore volume chemical features: nitogen, nitrogen to oxygen ratio, Pyridinic-N group, Pyrolytic-N group, Graphitic-N group, Oxidized-N group, Hydroxyl-O group, Carboxyl-O group	ANN used to determine impact of microstructural features, atomic configurations and operating parameters effect CDLC performance. It had R2 of 0.99, RMSE for 8.05. 2. The model was used to optimise the input parameters to give the best specific capacitance using a genetic algorithm. 550 F/g at 1 Ag-1 3. micropore surface area and micropore volume have largest significance	Not mentioned	https://doi.org/10.1016/j.jpowsour.2021.230968	micropore surface area, and volume (diffusion) are important. GA can be used for optimisation on surrogate model	Synergetic effect of N/O functional groups and microstructures of activated carbon on supercapacitor performance by machine learning
54	2021	Liu et al.	supercapacitors	6 ML models (MPL, ANN, SVM, RF, GBM, XGBoost)	porous carbon materials	R squared (0.892), pearson matrix, RMSE	105 samples, randomly divided into 83 samples and 22 for training.	11 porous structural features (SSA, PV, PS, Smicro, Smeso, ratio of each of those)	1. surface area micro/SSA provides most contribution for specific capacity among all features 2. XGBoost model obtained best performance with R values of 0.39, RMSE of 25.50 and MAE of 19.56	the correlation between real and predicted capacitance was limited 2. although the machine learning models can find a link between surface areas and specific capacitance, the input features may not account for connectivity of the pore network which is important	https://doi.org/10.1016/j.jelechem.2021.115684	ML model inputs not accounting for 3D network topology, meaning models are not fully predictive and may miss some key optimal solutions.	An emerging machine learning strategy for the assisted‐design of high- performance supercapacitor materials by mining the relationship between capacitance and structural features of porous carbon
55	2021	Ghosh et al.	supercapacitors	WEKA software (multilayer perceptron model) and random forest	cerium oxynitride electrode	Mean absolute error, RMSE, RAE. Principle component analysis	not reported	The name of the attributes selected in this work are (i) materials, (ii) oxide/nitrided, (iii) specific surface area, (iv) morphology, (v) compositing, (vi) current density, (vii) potential window, and (viii) current collector.	1. 26.6 mAh g-1 and capcity retention of >90% for particular materials (morphology, composition, surface area). 214 F g-1 2. machine learning approach can predict material performance	does not mention the limitations,	https://doi.org/10.1016/j.ensm.2021.05.024	specific capacity and cyclic stability considered most criticla performance related features for supercapacitor electrodes	Machine learning-based prediction of supercapacitor performance for a novel electrode material: Cerium oxynitride
56	2022	Jha et al.	lignin based supercapacitor	Linear regression (LR), SVG, decision tree, ANN	ligin supercapacitor electrochemical performance	R2 RMSE, MAE, MAPE	80% training, 20% test, 480 random cycles used for training	Cycle number, ligin wt%, NiWO4 wt%, PVDF wt %, SPC (mF cm-2)	1. ANN can generalise learned specific capacitance variation (MAPE 26.69, 3,43 and 8.04 for 3 different mateirals). It can predict performance for other wt% not included in the training datasets. Does not use any microstructural features	ANN can predict some scenarios well, but for SC3 does not have good correlation. Does not account for any microstructural features, which may contribute from the lignin derived materials.	https://doi.org/10.1021/acs.energyfuels.1c03270	Metions that no reliable theoretical model can predict the electrochemical performance of supercapacitors and so machine learning models (empirical should be made)	Data-Driven Predictive Electrochemical Behavior of Lignin-Based Supercapacitors via Machine Learning
57	2020	Mathew et al.	biomass supercapacitor	ANN, swarm intelligence. Response surface methodology. Box-Behnken design	Jackfruit seed derived super capacitor	Actual vs predicted	15 data sets generated by a BBD design study, used to make ANN	Impregnation ratio in grams of phosphoric acid to jackfruit seed, temperature of activation, percentage of jackfruit carbon to commercial to make electrode	1. machine learning techniques to optimise preparation process of supercapacitor electrodes from jackfruit seeds. 2. BBD model results used to train ANN 3. jackfruit dervied supercapacitors can be used, optimized reponse of 1g phosphoric acid, 430oC activation temperature and 60% of developed carbon used with 56.12 F g-1 capacitance	Does not include microstructural details in the prediction/optimisation process. They mention that alignment of carbon tubes can increase surface area	10.1002/ceat.201900616	Surface areas not included in the optimisation process	Modeling and Optimization of a Jackfruit Seed-Based Supercapacitor Electrode Using Machine Learning
58	2023	Mishra et al.	carbon electrode supercapacitors	5 regression models, extreme gradient boosting model, SVM, DT, XGBoost	specific capacitance prediction of different supercapacitor electrodes	RMSE, R2, Bias, MAPE	147 references (4899 data entries)	current density, pore volume, pore size, presence of defects, potential window, specific surface area, oxygen, and nitrogen content of the carbon-based electrode material	1. extreme booting model had best capacitive performance prediction. 2. PV, SSA and PW confirmed to be signficant contrubutors for electrode capacitance. 3. easy to use software and GUI SUPERCAPs made to provide an estimate of specific capacitance of carbon based supercapacitors	matching between trained ML models may be due to different experimental conditions during supercapacitor testing. Not all researchers perform electrode conditioning before measuring properties.	https://doi.org/10.1038/s41598-023-33524-1	ML algorithms used to determine impact of phyisochemical properties of carbon based materials on specific capacity of electrical double layer capacitors	The impact of physicochemical features of carbon electrodes on the capacitive performance of supercapacitors: a machine learning approach

## Sheet: Hydrocarbon reservoirs 
Paper No	Year	Authors	Porous Media type	ML model	Application	Evaluation metric	Data-set	Input	Key findings	Challenges/limitations	DOI	Title
1	2022	Liu and Mukerji	Heterogeneous porous media	Enhanced deep-superresolution (EDSR) convolutional neural network	Image resolution enhancement	Loss function		X-ray micro-computed-tomography (micro-CT) imaging data of multiscale porous systems	The developed enhanced deep-superresolution (EDSR) convolutional neural network can create superresolution images from low-resolution images, which alleviates common micro-CT hardware and/or reconstruction defects in high-resolution images.	Field-of-view and resolution trade-offs in X-ray micro-computed-tomography (micro-CT) imaging limit the characterization, analysis, and model development of multiscale porous systems	https://doi.org/10.1190/tle41090591.1	Digital transformation in rock physics: Deep learning and data fusion
2	2022	Jackson et al.	Porous media	Enhanced deep-superresolution (EDSR) convolutional neural network	Image resolution enhancement			LR images	The SR images are comparable to the HR ground truth and generally accurate to within experimental uncertainty. They are found to be significantly more accurate than their LR counterparts.	Field-of-view and resolution trade-offs in x-ray micro-computed-tomography (micro-CT) imaging limit the characterization, analysis, and model development of multiscale porous systems	https://doi.org/10.1103/PhysRevApplied.17.054046	Deep Learning of Multiresolution X-Ray Micro-Computed-Tomography Images for Multiscale Modeling
3	2022	Niu et al.	Carbonate rock sample	Convolutional neural network (CNN), generative adversarial network (GAN)	Image resolution enhancement	Loss function	2592	Natural LR/HR micro-CT images	The unpaired generative adversarial network (GAN) approach can reconstruct superresolution images as precisely as the paired convolutional neural network (CNN) method, with comparable training times and dataset requirements	The most important problem is the use of paired LR and HR data, which is needed in the training step of such methods but is difficult to obtain	https://doi.org/10.1007/s11242-022-01842-z	Paired and Unpaired Deep Learning Methods for Physically Accurate Super-Resolution Carbonate Rock Images
4	2020	Wang et al.	Carbonate rock sample	Enhanced Deep Super Resolution Generative Adversarial Network (EDSRGAN)	Image resolution enhancement	Peak signal-to-noise ratio (PSNR) and relative error	12,000 2D images and 3,000 3D volumes	Micro-computed tomography (μCT) images of rocks	The physical accuracy of the superresolved images is measured by permeability and phase topology, and the results show that EDSRGAN achieves the closest match to the ground truth	The algorithm may not be able to accurately superresolve features that are not present in the low-resolution input image	https://doi.org/10.1029/2019WR026052	Boosting Resolution and Recovering Texture of 2D and 3D Micro-CT Images with Deep Learning
5	2022	Liu and Mukerji	Carbonate rock sample	Style-based GAN Cycle-consistent GAN	Image resolution enhancement	Structural similarity index (SSIM) Effective permeability		High-resolution 2-D SEM image, low-resolution 3-D micro-CT volumes	The proposed method is effective in generating high-quality SEM images from low-resolution micro-CT images	The proposed method is based on the assumption that the micro-CT and SEM images are representative of the same rock sample	https://doi.org/10.1029/2022GL098342	Multiscale Fusion of Digital Rock Images Based on Deep Generative Adversarial Networks
6	2022	Fu et al.	Heterogeneous porous media	ANN	Pore geometry reconstruction			2D cross-sectional images	The proposed method is shown to be highly cost-effective and widely applicable, and it accurately preserves the statistical characteristics, geometrical irregularities, long-distance connectivity, and anisotropy that exist in 2D cross-sectional images	The accuracy of the reconstructed 3D microstructures may be affected by the quality of the 2D cross-sectional images used as input	https://doi.org/10.1016/j.cma.2021.114532	Stochastic reconstruction of 3D microstructures from 2D cross-sectional images using machine learning-based characterization
7	2022	Zheng and Zhang	Rock sample	Deep learning named RockGPT	Pore geometry reconstruction	The two-point correlation function		High-dimensional 2D slices	RockGPT can generate diverse reconstructions with porosities distributed around specified targets. The proposed conditioning scheme can be used to build a general model to produce multiple kinds of rocks simultaneously that also satisfy user-defined properties	RockGPT, is evaluated on a limited number of rock types and porosity ranges. Further experiments on a larger variety of rocks and porosity ranges are needed to validate the generalization ability of the model	https://doi.org/10.1007/s10596-022-10144-8	RockGPT: Reconstructing three-dimensional digital rocks from single two-dimensional slice from the perspective of video generation
8	2022	Yang et al.	Carbonate, shale, coal rock sample	Conditional generative adversarial network (cGAN)	Pore geometry reconstruction	The two-point correlation function		Three-dimensional carbonate micro-CT images	The proposed method can generate images independent of the structure size to some extent	The model was trained using a specific set of high-resolution core images and may not perform as well with different types of images or samples	https://doi.org/10.1016/j.jngse.2022.104411	Multi-scale reconstruction of porous media from low-resolution core images using conditional generative adversarial networks
9	2022	Zhang et al.	Pore-scale porous media	LGCNN (combination of generative adversarial networks (GAN) and convolutional neural networks (CNN))	Pore geometry reconstruction	Jensen-Shannon (JS) divergence		Micro-CT images of a Ketton sample	The proposed LGCNN algorithm is much faster than traditional numerical reconstruction methods and can efficiently and accurately reconstruct large-scale three-dimensional porous media, which can be treated as representative element volumes (REVs)	The proposed LGCNN algorithm is trained on a limited number of porous media samples, which may affect its generalization ability to other types of porous media	https://doi.org/10.1016/j.petrol.2022.110937	Fast and accurate reconstruction of large-scale 3D porous media using deep learning
10	2022	Ting et al.	Porous media	Convolutional neural networks (ConvNets)	Pore-scale simulation	Pixel-wise mean squared error (MSE)		2D images	Utulized a novel data processing algorithm and a specialized neural network architecture can provide fast and accurate predictions of the position of a moving front during CO22 injection for a given set of boundary conditions	Deep networks are computationally expensive and can be harder to train because of issues such as exploding or vanishing gradients	https://doi: 10.3390/en15238871	Using Machine Learning to Predict Multiphase Flow through Complex Fractures
11	2022	Ishola and Vilcaez	Porous media	Stochastic pore-scale simulation	Pore-scale simulation	MAPE		Porosity and pore size distribution (PSD)	Machine learning was used to reduce the required number of pore-scale simulations by 157 times and the estimated permeability was closer to measured permeability with this approach than with five deterministic empirical model equations	The limitation in using Nuclear Magnetic Resonance (NMR) T2 data through the Timur-Coates (TC) equation and the Schlumberger-Doll-Research (SDR) equation in carbonate rocks	https://doi.org/10.1016/j.fuel.2022.124044	Machine learning modeling of permeability in 3D heterogeneous porous media using a novel stochastic pore-scale simulation approach
12	2023	Sun et al.	Porous media	CNN	Pore-scale simulation	MSE	700	Micro-CT images	Using SE-ResNet as our network structure, more effective information between channels and avoid gradient disappearance and explosion problems are extract	This study is based on an ideal model that considers the permeability of organic matter distribution. A real shale oil three-dimensional core has not yet been considered	https://doi: 10.1063/5.0142574	Permeability prediction of considering organic matter distribution based on deep learning
13	2022	Tian et al.	Porous media	Support vector machine, artificial neural network, decision tree, random forest, gradient-boosting machine, and Bayesian ridge regression	Pore-scale simulation	Coefficient of determination (R-squared) and Root mean square error (RMSE)		Porosity, tortuosity, fractal dimension, average pore diameter, and coordination number	The proposed approach provides a fast and reliable way to predict permeability based on numerically generated porous images	The proposed approach is based on numerical simulations and machine learning models, which may not fully capture the complexity of real-world subsurface porous media	http://dx.doi.org/10.1061/(ASCE)CP.1943-5487.0000983	Improved Permeability Prediction of Porous Media by Feature Selection and Machine Learning Methods Comparison
14	2023	Bu et al.	Heterogeneous carbonate core sample	Linear regression models, regression trees, support vector machines, Gaussian process regression models and ensembles of trees	Pore-scale simulation	R-squared	>10000	3-D sub-image randomly extracted from the CT images	The proposed method provide an alternative approach of PNM simulation method for permeability prediction from CT images		https://doi.org/10.2118/212592-MS	Permeability Prediction of Carbonate Cores With Gaussian Process Regression Model
15	2023	Lee and Lumley	Shale reservoir	Multivariate linear regression (MLR)	Reservoir characterization (MBI prediction)	R2 RMSE		P-wave velocity (VP), S-wave velocity (VS), VP/VS ratio, bulk density (ρ), bulk modulus (K), shear modulus (G), Young's modulus (E), and Poisson's ratio (ν)	The study used a deep neural network technique to derive the nonlinear estimation model with a better fit to the MBI data than the traditional methods	Blindly feeding all the logs from the datasets to build a model may cause the overfitting problem and inefficiency for large datasets	https://doi.org/10.1016/j.petrol.2022.111231	Predicting shale mineralogical brittleness index from seismic and elastic property logs using interpretable deep learning
16	2023	Ore and Gao	Shale formation	Gradient boosting (GB), support vector regression (SVR), and neural networks (NN)	Reservoir characterization (MBI prediction)	R2 MSE MAE		Gamma ray, neutron porosity, density, caliper, sonic, and photoelectric factor logs	The workflow in this study can be adopted to predict other reservoir properties from available logs. The workflow can also be adopted to characterize reservoir heterogeneity from seismic traces trained by well logs.	The study is based on a specific dataset, and the results may not be generalizable to other datasets or reservoirs	https://doi.org/10.1016/j.cageo.2022.105266	Prediction of reservoir brittleness from geophysical logs using machine learning algorithms
17	2023	Saporetti et al.	Subsurface reservoir	Support Vector Machines, Extreme Learning Machine, and Ridge Regression	Reservoir characterization (TOC prediction)	MAE RMSE MAPE R2		Well logs and stratigraphic analysis of rock samples	The Support Vector Machine method outperformed the other methods in several metrics analyzed, producing accurate predictions, showing that the approach present in this paper can be used as a surrogate model to assist geologists and petrologists in estimating total organic carbon values	The proposed methodology was validated on core samples of the shale gas field YuDongNan area, Sichuan Basin. Therefore, the generalization of the results to other areas or types of rocks may be limited	https://doi.org/10.1007/s13762-022-04081-3	Machine learning with model selection to predict TOC from mineralogical constituents: case study in the Sichuan Basin
18	2023	Zhang et al.	Shale oil and gas	Multiple regression analysis (MRA), ΔlgR, back propagation (BP) neural network, gradient boosting decision tree (GBDT)	Reservoir characterization (TOC prediction)	RMSE R2		Density (DEN), uranium (U), acoustic (AC), and resistivity (RT) logs	Sensitivity analysis of the GBDT model revealed that the U parameter exhibited the greatest impact on TOC prediction. Also the GBDT model is well suited for TOC prediction of unconventional resources	Limited work on intelligent prediction of TOC	https://doi.org/10.1016/j.petrol.2022.111271	TOC prediction using a gradient boosting decision tree method: A case study of shale reservoirs in Qinshui Basin
19	2023	Bemani et al.	Subsurface reservoir	Artificial Neural Network, Support Vector Machine, Decision Tree, K-nearest Neighbors, Ensemble Learning, Random Forest and Adaptive Boosting	Predict bacterial cell concentration	R2 MSE(EL)=0.0542	110	Information on incubation time, salinity, temperature and yeast extract	The ensemble learning model was found to be the most accurate, with a correlation coefficient of 0.9163 and mean squared error of 0.0542 on the tested dataset	The accuracy of the models developed in this study may be influenced by the size and diversity of the dataset used for training	https://doi.org/10.1016/j.petrol.2022.111162	An insight into the microorganism growth prediction by means of machine learning approaches
20	2023	Rajabi et al.	Oil reservoir	HML algorithms DL convolutional neural network	Reservoir characterization (Shear wave velocity prediction)	RMSE=0.055 R2=0.9729	8694	Gas well logging data	The DL convolutional neural network model slightly outperforms the HML algorithms tested. Both DL and HLM models substantially outperform five commonly used empirical relationships	Extracting such data by analyzing finite reservoir rock cores is very costly and limited	https://doi.org/10.1007/s13202-022-01531-z	Predicting shear wave velocity from conventional well logs with deep and hybrid machine learning algorithms
21	2023	Shen et al.	Subsurface reservoir	Gradient boosting machine (XGBoost) and interpretable tabular learning architecture (TabNet), called KXGB and KTabNet	Reservoir characterization (MMP prediction)	R2= 0.9833 RMSE=0.7637 MAE=0.55	421	Reservoir temperature, Composition of crude oil, Composition of injected gas	KXGB is the most recommended superior solution for modeling MMP owing to its outstanding performance and simplicity of optimization	Limited MMP datasets are one of the reasons why models tend to overfit	https://doi.org/10.1016/j.engappai.2022.105687	Interpretable knowledge-guided framework for modeling minimum miscible pressure of CO2-oil system in CO2-EOR projects
22	2023	Huang et al.	Oil/gas reservoir	1D-CNN	Reservoir characterization (MMP prediction)	MAPE=7.29 MSE=3.7916 R2=0.9458	193	Individual compounds present in the crude oil and CO2 mixture	There is a very good correlation between the MMP measured with the slim-tube and the rising bubble apparatus (RBA) method	The model is based on data obtained from laboratory experiments, and the accuracy of the predictions may vary in real-world scenarios	https://doi.org/10.1016/j.fuel.2022.127194	Prediction of minimum miscibility pressure (MMP) of the crude oil-CO2 systems within a unified and consistent machine learning framework
23	2023	Lv et al.	Subsurface reservoir	XGBoost CatBoost LGBM RF deep MLN DBN CNN	Reservoir characterization (MMP prediction)	AARD=1.34	310	Percent of volatile (C1 and N2) and intermediate (CO2, H2S, and C2–C5) fractions of oil, the average critical temperature of injection gas (Tcave), reservoir temperature (Tres), and molecular weight of C5+ fraction of oil (MWc5+)	The study demonstrates the high accuracy and reliability of the proposed machine learning models in estimating CO2 MMP in a wide range of operational conditions	The study only considers a limited number of input variables for the developed models, and other factors that may affect CO2 MMP, such as pressure, salinity, and oil composition, are not included in the analysis.	https://doi.org/10.1016/j.seppur.2022.123086	Modelling minimum miscibility pressure of CO2-crude oil systems using deep learning, tree-based, and thermodynamic models: Application to CO2 sequestration and enhanced oil recovery
24	2023	Liu et al.	Subsurface reservoir	Stacking regressor (Ensamble model)	Reservoir characterization (MMP prediction)	MAE RMSE R2	147	Pretreated MMP data	The study compared the performance of the stacking model with empirical formulas and found that the stacking model performed better in terms of accuracy and range of use	The stacking model approach used in this study may not be applicable to other datasets or reservoir conditions	https://doi.org/10.1021/acs.energyfuels.2c03033	Novel Way to Predict the MMP of a CO2–Oil System Using Stacking Models
25	2022	Zhao et al.	Underground aquifers and hydrocarbon-bearing layers	Linear Regression, Back Propagation Neural Network Regression, K-Neighbors Regression, Random Forest Regression, Support Vector Machine Regression, Gradient Boosting Decision Tree Regression, and Extreme Gradient Boosting (XGBoost) Decision Tree Regression	Reservoir characterization (Permeability prediction)	R2(XGBoost)=0.9108 MSE(XGBoost)=0.135		Logging data	The XGBoost model can provide a rapid and accurate prediction of permeability in underground aquifers and hydrocarbon-bearing layers without the need for coring and testing	The study only focuses on low-permeable sandstones of Zhuhai Formation in Wenchang A Sag, Pearl River Mouth Basin, so the results may not be applicable to other types of reservoir rocks or geological formations	https://doi.org/10.1016/j.petrol.2022.110517	Logging-data-driven permeability prediction in low-permeable sandstones based on machine learning with pattern visualization: A case study in Wenchang A Sag, Pearl River Mouth Basin
26	2022	Yang et al.	Subsurface reservoir	SABiLSTM, that combines 1-D convolutional layer and bidirectional long short-term memory network	Reservoir characterization (Permeability and porosity prediction)	R2 RMSE R		Gamma ray, resistivity, density, and neutron logs	The testing results of the well-trained network in blind wells of three different regions show that the proposed method is accurate and robust in the reservoir parameters prediction task	The proposed model, SABiLSTM, needs further optimization to reduce the training time and improve the prediction accuracy	https://doi: 10.1109/TNNLS.2022.3157765	High-Fidelity Permeability and Porosity Prediction Using Deep Learning With the Self-Attention Mechanism
27	2023	Masroor et al.	Subsurface reservoir	Multiple-Input deep Residual Convolutional Neural Network (MIRes CNN)	Reservoir characterization (Permeability prediction)	R2 MSE MAPE MAE		Well logs	The importance of using physically meaningful log-derived images for CNN model training and the crucial role played by the modified architectures in enhancing the accuracy and performance of the model	The proposed model is based on machine learning techniques and may not capture all the physical complexities of the reservoir system	https://doi.org/10.1016/j.geoen.2023.211420	A multiple-input deep residual convolutional neural network for reservoir permeability prediction
28	2022	Matinkia et al.	Hydrocarbon reservoirs	Combination of Social Ski-Driver (SSD) and multilayer perception (MLP), neural network Genetic Algorithm-MLP, Particle Swarm Optimization-MLP	Reservoir characterization (Permeability prediction)	R2=0.9928		Petrophysical logs such as depth, calorimetry, corrected gamma, photoelectric coefficient, neutron porosity, density, true resistance, and time of compression wave travel	MLP-SSD method predict is the most accurate in predicting permeability, however MLP-GA converged faster	Although the model performed well in a highly heterogeneous formation, it is advised to use the model with care in other formations and rocks	https://doi.org/10.1016/j.petlm.2022.03.003	Prediction of permeability from well logs using a new hybrid machine learning algorithm
29	2023	Chao et al.	Shale gas	Mind Evolutionary Algorithm (MEA) and Adaptive Boosting Algorithm-Back Propagation Artificial Neural Network (ADA-BPANN)	Comparing the MEA with PSO and GE for optimization of the ADA-BPANN	R2 RMSE MAPE	616	Seepage pressure (Ps), confining pressure (Pc), moisture saturation (S), and state of confining pressure loading or unloading (L)	MEA with ADA-BPANN has higher prediction accuracy, shorter training time, and can avoid problems such as local optimization and overfitting	There are many influencing factors and the mechanism of interaction is complex, it is difficult to accurately predict the gas permeability of shale	https://doi.org/10.1016/j.gete.2023.100435	Prediction of the shale gas permeability: A data mining approach
30	2022	Pan et al.	Oil reservoirs	XGBoost, Genetic algorithm (GA), Grid search method (GS)	Reservoir characterization (Porosity prediction)	RMSE=0.527946 MAE=0.155880 MAPE=0.020500	35066	Logging data	The proposed model can overcome the limitations of conventional logging interpretation methods and previous machine learning-based porosity prediction methods	The proposed method may require a significant amount of computational resources and time for optimization and training	https://doi.org/10.1016/j.petrol.2021.109520	An optimized XGBoost method for predicting reservoir porosity using petrophysical logs
31	2021	Wang and Cao	Subsurface reservoirs	Combination of 1-D CNN and Bidirectional gated recurrent unit neural network	Reservoir characterization (Porosity prediction)	RMSE=0.1081 MAE=0.0985		Well logs	The designed network take advantage of both networks and overcome the limitations. Using this approach, porosity can be predicted from series of input log data fully considering the correlation of different log series and porosity, the variation trend, and context information with depth	The availability of cores is limited, and also the spatial interdependence between sediments and the spatial coupling between the well logs data is challenging	https://doi.org/10.1007/s13369-021-06080-x	Deep Learning Reservoir Porosity Prediction Using Integrated Neural Network
32	2022	Ibrahum et al.	Tight gas sandstone formation	Function networks (FNs), support vector machine (SVM), and random forests (RFs)	Reservoir characterization (Water saturation prediction)	R2 AAPE	782	Gamma-ray log, neutron porosity log, and resistivity (Rt) log	The ML models outperform the empirical correlations, and accurately forecast the water saturation well logs without additional core analysis or well site interventions	The dataset used in this study is limited to two wells in a tight gas sandstone formation, so the generalizability of the results to other formations may be limited	https://doi.org/10.1115/1.4053248	Application of Various Machine Learning Techniques in Predicting Water Saturation in Tight Gas Sandstone Formation
33	2021	Zhao et al.	Porous media	Digital quantum mechanism-based neural network (DQNN)	Reservoir characterization (Permeability prediction)		200	Digital porosity, coordination number and pore network size	The proposed DQNN method has better performance compared to the classical ANN approach in terms of accuracy of prediction, computational cost, and agreement with experimental permeability		https://doi.org/10.1007/s11431-021-1906-1	DQNN: Pore-scale variables-based digital permeability assessment of carbonates using quantum mechanism-based machine-learning
34	2023	dos Anjos et al.	Carbonate reservoirs	CNN	Reservoir characterization (Permeability prediction)	MSE Huber loss	37600	Micro-CT images	The proposed workflow present accurate estimations of absolute permeability within a few seconds by processing micro-CT slices	The study uses micro-CT images as input data, which may not capture all the relevant features of the rock samples and may not be available for all reservoirs	https://doi.org/10.1016/j.geoen.2022.211335	Permeability estimation on raw micro-CT of carbonate rock samples using deep learning
35	2020	Alqahtani et al.	Porous media	Convolutional Neural Networks	Reservoir characterization (Permeability prediction)	Huber loss		Greyscale and binary microtomographic images	Porosity, specific surface area, and average pore size of each image are computed, and a good agreement between CNN predictions and actual targets is achieved	The study only focuses on three types of sandstone, so the results may not be generalizable to other types of porous media	https://doi.org/10.1016/j.petrol.2019.106514	Machine learning for predicting properties of porous media from 2d X-ray images
36	2023	Pal et al.	Subsurface reservoirs	ANN	Upscaling	R2	1000	2-D permeability distribution	The method is demonstrated through a series of 2D test cases, and its accuracy is proved over analytical and numerical upscaling methods	The neural upscaling methodneeds a large amount of training data. To overcome this limitation, the authors generated pseudo training data using classical upscaling approaches	https://doi.org/10.3390/pr11020601	Upscaling Porous Media Using Neural Networks: A Deep Learning Approach to Homogenization and Averaging
37	2023	Wang et al.	Subsurface reservoirs	Machine learning assisted upscaling (MLAU) approach	Upscaling				The paper demonstrates the accuracy and speedups of the MLAU approach through numerical experiments on three example cases	The accuracy and effectiveness of the MLAU approach may depend on the quality and representativeness of the training data used	https://doi: 10.1016/j.apenergy.2023.120854	Machine learning assisted two-phase upscaling for large-scale oil-water system
38	2022	Wang et al.	Subsurface reservoirs	ResNet-18 model XGBoost	Upscaling			Local permeability distribution of the subsurface model	The coarse-scale simulation results using the newly developed machine learning assisted upscaling are of similar accuracy to the coarse results using full numerical upscaling in less time at both ensemble and realization-by-realization levels	The proposed machine learning assisted upscaling method was tested only for generic (left to right) flow problems using 2D models. Therefore, the applicability of this method to more complex and realistic subsurface models needs to be further investigated	https://doi.org/10.1016/j.energy.2022.123284	Machine learning assisted relative permeability upscaling for uncertainty quantification
39	2022	Santos et al.	Subsurface reservoirs	Deep neural network, clustering analysis	Upscaling	R Cumulative oil production (COP)		High-resolution geological models and the corresponding petrophysical properties and the production and injection rates	The proposed artificial intelligence approach performed an accurate upscaling, surpassing the reference approach with forecast production similar to the fine model, and also fast to compute when considering multiple geological realizations, since it reduces the required numerical simulations to a fraction of the total	The proposed method is still computationally intensive, although it requires fewer simulations than the traditional flow-based upscaling method	https://doi.org/10.1016/j.petrol.2021.110071	An artificial intelligence method for improving upscaling in complex reservoirs
40	2022	Siavashi et al.	Subsurface reservoirs	CNN	Upscaling	R2		Two series of high-resolution (10x) and low-resolution (4x) images	Results showed a satisfying match between the dynamic behaviour of the upscaled model through CNNs and high-resolution properties with a significant reduction of computational cost and time	The paper only focuses on the upscaling of porosity and permeability properties. Other important properties such as capillary pressure, relative permeability, and wettability are not considered in the study	https://doi: 10.1016/j.fuel.2021.122047	A CNN-based approach for upscaling multiphase flow in digital sandstones
41	2023	Alolayan et al,	Subsurface reservoirs	Deep neural network	History matching	Misfit function	900	Bottom Hole Pressure (BHP)	The proposed method outperforms traditional optimization methods in terms of efficiency and accuracy	The effectiveness of the method may depend on the quality and quantity of the available data	https://doi: 10.3390/en16020860	Parallel Automatic History Matching Algorithm Using Reinforcement Learning
42	2022	Jo et al.	Subsurface reservoirs	Convolutional autoencoder (CAE), convolutional neural network (CNN), and convolutional denoising autoencoder (CDAE)	History matching	R2 RMSE	100	Oil production rate data	The proposed method outperforms other methods in terms of geological constraints for fluvial channels and the computational cost of sampling posterior models	The proposed method may not be able to capture all the complex geological features of the reservoir, and additional manual adjustments may be required to ensure geological consistency	https://doi.org/10.1016/j.petrol.2021.109247	Efficient deep-learning-based history matching for fluvial channel reservoirs
43	2022	Ma et al.	Subsurface reservoirs	CNN RNN	History matching	R2 RMSE		Well control parameters such as porosity and permeability	Compared with the MEDA using only numerical simulations, the surrogate-based AHM workflow significantly reduces the computational cost	The surrogate model is trained using a limited number of numerical simulations, which may not capture the full range of possible solutions. Increasing the number of simulations used for training may improve the accuracy of the surrogate model	https://doi.org/10.1016/j.petrol.2022.110109	A novel hybrid recurrent convolutional network for surrogate modeling of history matching and uncertainty quantification
44	2022	Ma et al.	Subsurface reservoirs	CNN LSTM	History matching			High-dimensional spatial parameters	The proposed surrogate model can effectively predict production data and improve the efficiency of history matching		https://doi: 10.1016/j.petrol.2022.110548	A vector-to-sequence based multilayer recurrent network surrogate model for history matching of large-scale reservoir
45	2022	Xiao et al.	Subsurface reservoirs	Deep neural network (DNN)	History matching	Root mean square error (RMSE) and the correlation coefficient (CC)		Three-dimensional image of logarithmic permeability	The surrogate-assisted inversion with stochastic gradient optimizer obtains a very quick convergence rate against the model and data noise for the high-dimensional history matching problem with a large number of data and parameters	The paper assumes that the model and data noise are Gaussian and independent, which may not be the case in real-world scenarios	https://doi: 10.1016/j.petrol.2021.109287	Surrogate-assisted inversion for large-scale history matching: Comparative study between projection-based reduced-order modeling and deep neural network
46	2023	Qubian et al.	Subsurface reservoirs	Deep neural network (DNN)	Reservoir simulation			Reservoir properties such as porosity, permeability, and fluid properties such as viscosity and density	The proposed high-speed simulation model (AI-Physics hybrid reservoir simulation) can reduce the history matching and scenario assessment time by 90 to 95%	The use of AI-Physics hybrid models may require significant computational resources and expertise, which may limit their practicality for some applications	https://doi.org/10.2118/214475-MS	A Novel High-Speed AI-Physics Hybrid Model to Predict the Reservoir Behavior; A Case Study
47	2023	Behl and Tyagi	Oil reservoirs	ROM leveraging long short-term memory (LSTM)	Reservoir simulation	RMSE		A black-oil reservoir simulation model	The ease with which ROMs can be built and used to meet or exceed the predictive capabilities of certain time-history production data using the reservoir simulation	The study only considers black-oil reservoir simulation models, and the effectiveness of the proposed approach for other types of reservoir models is not explored	https://doi.org/10.2118/214288-PA	Data-Driven Reduced-Order Models for Volve Field Using Reservoir Simulation and Physics-Informed Machine Learning Techniques
48	2023	Huang et al.	Oil reservoir	Deep-learning-based reduced-order modeling (ROM)	Reservoir simulation	MAE		Subsurface flow data	Compared to the simulation results, the improved E2C model is highly accurate with a median average error of 3.1% for production, 1.0% for saturation and 5.9% for pressure	The proposed improved E2C model has only been tested on two reservoirs, one 2D and one 3D. Further testing on a larger variety of reservoirs is needed to validate the model's effectiveness in different scenarios	https://doi.org/10.1016/j.geoen.2023.211418	Deep-learning based surrogate modeling for fast and accurate simulation in realistic 3D reservoir with varying well controls
49	2023	Saberali et al.	Gas reservoirs	Deep learning-based surrogate model	Reservoir simulation	R2 R RMSE AARD		Static parameters and dynamic variables	A hybrid data source based on finite difference and the streamline data introduced, which simplifies the data supply process, increases the efficiency of the model training, and greatly accelerates the use of the trained model in the practical usage phase	The type and quality of training data source affect the surrogate models	https://doi.org/10.1016/j.geoen.2023.211415	Simulating dynamics of pressure and fluid saturation at grid-scale by a deep learning-based surrogate reservoir modeling based on a fast-supply hybrid database and developing preliminary insights for future gas hydrate exploitations in China
50	2023	Shuaibi et al.	Oil reservoirs	ANN	Reservoir simulation				AI-simulation method was faster, data driven and allow a faster testing of multiple development strategies in short time	The paper mainly focuses on how PDO is using digital technologies and AI to improve their field development planning	https://doi.org/10.2118/212623-MS	Case Study Artificial Intelligence (AI) Assisted Numerical Reservoir Simulations in a Mature Reservoir Under Waterflood Development in the Sultanate of Oman
51	2023	Manasipov et al.	Carbonate reservoirs	Generalized Additive Models (GAM), Gradient Boosting, and Convolutional and Recurrent Neural Networks	Reservoir simulation	R2 MAE		Time series data on production and injection rates	The presented method holds the properties of explainable regression models while providing powerful predictability capabilities within material balance constraints.	The paper does not provide any experimental results or case studies to demonstrate the effectiveness of GAMs in reservoir behavior analysis, which could limit the practical relevance of the proposed approach	https://doi.org/10.2118/212666-MS	Physics Informed Machine Learning for Production Forecast
52	2023	Kong et al.	Unconventional reservoir	Long short-term memory neural network (LSTM)	Production forecasting	R2 MAE RMSE MAPE	916-1309	Actual oil production data	The proposed model makes predictions for the well production rate, and comparative experiments show that it has higher forecasting accuracy than other methods	The proposed hybrid model was only tested on one specific oil reservoir, the JinLong volcanic reservoir, and its effectiveness on other reservoirs is unknown	https://doi.org/10.3390/en16031027	A Hybrid Oil Production Prediction Model Based on Artificial Intelligence Technology
53	2023	Chu et al.	Shale gas reservoir	Attention mechanism, skip connection, and cross-validation	Production forecasting			Production time, variable bottom hole pressure, and the fracture networks properties	The attention mechanism is robust and The computation time of the trained attention mechanism model is approximately 0.3 s, which equates to 3.8% of the physical model’s running time	The proposed proxy model is based on data generated from the boundary element method, which may not fully capture the complexity and heterogeneity of real shale gas reservoirs. Therefore, the model's accuracy may be limited by the quality and representativeness of the training data	https://doi.org/10.46690/ager.2023.01.06	A deep-learning approach for reservoir evaluation for shale gas wells with complex fracture networks
54	2023	Ibrahim et al.	Shale formation	Linear regression, random forest (RF), and decision tree (DT) and gradient boosting regression (GBR)	Production forecasting	correlation coefficient (R)	200	Lateral length, the number of stages, the total injected proppant and slurry volumes, and the maximum treating pressure	The study provides a machine learning application with an empirical correlation to predict the EUR from the completion design parameters at an early time without the need for complex numerical simulation analysis	The accuracy of the EUR prediction from completion data alone was found to be low, so an intermediate step of estimating the well IP30 was carried out. This may add some complexity to the prediction process	https://doi.org/10.1007/s13202-022-01602-1	Data-driven EUR for multistage hydraulically fractured wells in shale formation using different machine learning methods
55	2023	Osah and Howell	Subsurface oil field	Linear regression, robust linear regression, linear kernel support vector regression, cubic kernel support vector regression and boosted trees regression	Production forecasting	R2 MSE RMSE MAE		Gross depositional environment, average permeability, net-to-gross, gas–oil ratio and total number of wells	The best method for both outcome variables was the support vector regression, where, depending on the kernel function applied,	The choice of controlling parameters was based on a PCA of a larger dataset from a wider project database, which may not capture all relevant factors that influence oil field performance	https://doi.org/10.1144/petgeo2022-071	Predicting oil field performance using machine learning programming: a comparative case study from the UK continental shelf
56	2023	Hussain al-ali and Horrne	Oil/gas reservoir	Temporal Fusion Transformer (TFT), Block Recurrent Neural Network architectures (BlockRNN)	Production forecasting	MSE		Historical bottomhole pressure, wellhead pressure, wellhead temperature and choke size opening real time series data	The TFT probabilistic deep learning model showed very promising results outperforming conventional BlockRNN, in term of oil production prediction	The accuracy of the forecasting model may depend on the quality and quantity of data available for training	https://doi.org/10.2118/214133-MS	Probabilistic Well Production Forecasting in Volve Field Using Temporal Fusion Transformer Deep Learning Models
57	2023	Liu et al.	Shale oil reservoir	ANN	Production forecasting	correlation coefficients (R)	48	Geological variables	The increase in liquid hydrocarbon content, mud gas content, TOC and normal faults percentage has positive effects on shale oil production, while the increase in reverse faults percentage has negative effects. The sweet spot predicted by the model matches well with the oil test results	The sweet spots should be synonymous with the overall combination of geological, engineering and economic sweet spots	https://doi.org/10.1016/j.apenergy.2022.120604	An advanced prediction model of shale oil production profile based on source-reservoir assemblages and artificial neural networks
58	2023	Ullah et al.	bio-oil	GPR, DT, ANN, ET, SVM with PSO and GA	Production forecasting	R2 RMSE	322	Temperature, time, Particle size, Heating rate, Nitrogen flow	GPR-GA model showed accurate results compared to GPR-PSO and experimental study with maximum error of 1.48	The study uses genetic algorithm and particle swarm optimization for feature selection and hyperparameter optimization, respectively. These methods may not always guarantee the global optimum solution and may require extensive computational resources	https://doi.org/10.1016/j.jaap.2023.105879	Optimization based comparative study of machine learning methods for the prediction of bio-oil produced from microalgae via pyrolysis
59	2023	Du et al.	Coalbed methane	Local Outlier Factor(LOF) and eXtreme Gradient Boosting(Xgboost) Long-Short-Term-Memory(Bi-LSTM)	Production forecasting	R2 RMSE MAE	782	Pressure, gas production, cumulative production	The LOF-Xgboost governance system not only enhances the short-term prediction performance but also significantly improves the long-term prediction robustness. The improved Bi-LSTM-based production model of CBM shows more powerful adaptability and accuracy for both conventional curve patterns and irregular production behavior	The study does not provide a detailed analysis of the physical mechanisms underlying CBM production, and the results are based solely on data-driven models	https://doi.org/10.1016/j.energy.2022.126121	A systematic data-driven approach for production forecasting of coalbed methane incorporating deep learning and ensemble learning adapted to complex production patterns
60	2022	Tang and Durlofsky	Subsurface reservoirs	Random forest and light gradient boosting machine	Operational parameters and well placement optimization	NPV	150	A high-fidelity geomodel of the reservoir, candidate well locations and well configurations	The proposed method provides a significant speedup compared to optimization using high-fidelity models, with the best-case net present value (NPV) within 1% of the high-fidelity result	The clustering procedure used to select a representative set of well configurations for training the machine-learning models may not always result in the best possible set of configurations	https://doi.org/10.1007/s10596-022-10153-7	Use of low-fidelity models with machine-learning error correction for well placement optimization
61	2022	Bertini et al.	Oil reservoirs	Regression algorithm, Elastic Net (ENET), K-Nearest Neighbor (KNN), Multi-layer Perceptrons (MLP), Kernel Ridge Regression (KRR), Support vector regression (SVR), Gradient Tree Boosting (GTB)	Operational parameters and well placement optimization	RMSE R2	1000	Binary representations of oil production strategies	Some regression algorithms can be used as a surrogate model to the simulator to efficiently perform well placement optimization considering binary data	The surrogate model used in the study is based on machine learning algorithms, which may not be accurate enough for some applications	https://doi.org/10.1016/j.petrol.2021.109208	A comparison of machine learning surrogate models for net present value prediction from well placement binary data
62	2023	Zhou et al.	Fractured shale gas reservoir	MLP Surrogate Model	Operational parameters and well placement optimization	R2 RMSE	500	Shale gas rate	The surrogate model significantly contributes to the convergent performance of multi-objective optimization algorithm	The computational cost of the proposed framework may still be high for some field-scale applications, especially if more complex models or larger optimization domains are used	https://doi.org/10.3390/en16010303	Hierarchical Surrogate-Assisted Evolutionary Algorithm for Integrated Multi-Objective Optimization of Well Placement and Hydraulic Fracture Parameters in Unconventional Shale Gas Reservoir
63	2023	Nasir and Durlofsky	Oil/gas reservoir	Deep reinforcement learning (DRL)	Operational parameters and well placement optimization	Minimum acceptable rate of return (MARR) and NPV		Geological models of the reservoir and historical production data	The optimal well settings provided by the control policy display gradual ramping, consistent with operational requirements	The study assumes that the reservoir model is accurate and that the uncertainties are only due to the geological scenarios. However, in reality, there may be other sources of uncertainty that are not considered in this study	https://doi.org/10.2118/212237-PA	Practical Closed-Loop Reservoir Management Using Deep Reinforcement Learning
64	2023	Chen et al.	Shale gas	Neural network Sharpley ensemble randomized maximum likelihood (EnRML)	Operational parameters and well placement optimization	R2	104	Operational and geological parameters	The results of the paper show that the InterOpt model was able to optimize eight operational parameters of 104 shale gas wells, resulting in an average reduction rate of 9.7% in the wells' average cost	The effectiveness of the InterOpt model may vary depending on the specific problem being addressed and the quality of the input data	https://doi.org/10.1016/j.petsci.2022.12.017	Interpretable machine learning optimization (InterOpt) for operational parameters: A case study of highly-efficient shale gas development
65	2023	Yao et al.	Carbonate reservoirs	Random Forest (RF) Logistic regression Support-vector machine	IOR/EOR Screening	Cohen’s kappa coefficient	402	IFT, oil API gravity, porosity, and surfactant systems	Porosity, permeability, and surfactant concentration are positively associated with surfactant performance. The framework promotes the understanding of wettability alteration by surfactants and provides a fast framework to predict, analyze, and optimize surfactant performance	The machine learning models and optimization procedures proposed in this paper are based on the specific dataset and experimental conditions used in the study	https://doi.org/10.1016/j.cej.2022.138022	Insights to surfactant huff-puff design in carbonate reservoirs based on machine learning modeling
66	2023	Fabbri et al.	Carbonate reservoir	ML model	IOR/EOR Screening	Recovery factor		Existing well deviation paths, Production data (water, oil, gas), Latest pressure historical data, Faults polygon, Depths of the horizons targeted	The algorithm was able to identify additional infill candidates beyond those selected by human experts, and the subsequent drilling of these wells was estimated to improve the recovery factor of the reservoir by 0.5%	The historical data used to identify the best infill candidates may not be comprehensive or up-to-date, which could affect the accuracy of the results	https://doi.org/10.2118/212678-MS	Application of Machine Learning in a Giant Mature Reservoir to Speed-Up Infill Prospects Screening, Optimize Field Development and Improve the Ultimate Recovery Factor
67	2023	Pirizadeh et al.	Oil reservoir	Multi-Gene Genetic Programming (MGGP), ANN	IOR/EOR Screening	R2=0.982	426	Rock and fluid characteristics	Proposed method, unlike conventional machine learning methods, provides a definite function as the output that allows further analysis for reservoir experts	The proposed approach relies on the availability and accuracy of reservoir data, which may not always be available or reliable	https://doi.org/10.1080/10916466.2022.2030752	A new approach for ranking enhanced oil recovery methods based on multi-gene genetic programming
68	2022	Pavan et al.	Oil reservoir	Physics Informed Machine Learning (PIML), Neural network	IOR/EOR Screening	R2=0.99		Combination of 13 parameters	The paper describes a screening process for identifying suitable microbe-nutrient combinations for in-situ microbial enhanced oil recovery	The screening process based on a screening score may not necessarily reflect the actual oil recovery, and further experimentation may be required to confirm the results	https://doi.org/10.1016/j.biortech.2022.127023	Predicting performance of in-situ microbial enhanced oil recovery process and screening of suitable microbe-nutrient combination from limited experimental data using physics informed machine learning approach
69	2022	Mahdaviara et al.	Onshore/offshore low permeability reservoirs	Random Forest (RF), Gradient boosting Machine (GBM), and Extreme Gradient boosting (XGBoost), and the evolutionary algorithm of Gene Expression Programming (GEP)	IOR/EOR Screening	Precision Recall F1-score		Permeability, porosity, API, viscosity, lithology, depth, and temperature	The study generates EOR screening tools based on statistical plots, ensemble learning algorithms, and evolutionary algorithms, which are found to be valuable for the scope of the study	The applicability of the results and tools may be limited to the specific conditions and parameters of the oilfields included in the databank	https://doi.org/10.1016/j.fuel.2022.124795	Toward evaluation and screening of the enhanced oil recovery scenarios for low permeability reservoirs using statistical and machine learning techniques

## Sheet: Carbon Capture & Sequestration
Paper No	Year	Authors	Porous Media type	ML model	Application	Evaluation metric	Data-set	Input	Key findings	Challenges/limitations	DOI	Title
1	2022	Zhang et al.	Ionic liquid encapsulated metal-organic framework (IL@MOF) composites	RFR	CO2/N2 selectivity and CO2 permeability	structural features: R2 = 0.647 RMSE = 1.052 MAE = 0.772 combination structural with chemical features: R2 = 0.728 RMSE = 0.365 MAE = 0.277	8167 IL@MOF composites the filler database consisting of 8167 IL@MOF composites was first constructed by embedding [NH2-Pmim][Tf2N] into CoRE MOFs	Geometric features: PLD, gASA, vASA, global cavity diameter (GCD), largest cavity diameter (LCD), void fraction (φ), density (ρ), accessible volume (AV) and free volume (Vfree) Chemical Features: unsaturation degree, metallic percentage, oxygen-to-metal ratio	ML techniques revealed the most significant factors affecting CO2/N2 selectivity and CO2 permeability in the MOF composite The RF model revealed that AV is a key factor in predicting membrane selectivity and gASA is a key factor in predicting CO2 permeability [NH2-Pmim][Tf2N]@ZIF-67 is a potential candidate for (Mixed Matrix Membranes) MMMs fabrication For CO2/N2 selectivity, the top 4 descriptor…		doi.org/10.1016/j.memsci.2022.120399	Machine learning aided high-throughput prediction of ionic liquid@MOF composites for membrane-based CO2 capture
2	2022	Guan et al.	metal organic framework-based mixed matrix membranes	RF Transfer Learning	material screening CO2/CH4 seperation performance	CO2 permeability: R2(test) = 0.77 RMSE(test) = 1.45 CO2/CH4 Selectivity: R2(test) = 0.7 RMSE(test) = 0.31	648 experimental data colected from literature	properties of MOF: type, particle size, surface area (BET), aperture size, and pore diameter properties of the polymeric matrix: polymer type, control CO2 permeability, and control CO2/CH4 selectivity characteristics of the MMMs: MOF loading and membrane thickness testing conditions: e.g., temperature (T) and pressure (P)	RF models trained on literature data for CO2/CH4 separation were used to identify suitable MOFs for constructing MMMs. The resulting membranes showed CO2 separation performance beyond the 2008 Robeson upper bound and agreed well with model predictions		doi.org/10.1016/j.xcrp.2022.100864	Design and prediction of metal organic framework-based mixed matrix membranes for CO2 capture via machine learning
3	2022	Moosavi et al.	MOFS Zeolits COFs	XGBoost	heat capacity	MAE = 0.02 RMAE = 2.89% SRCC = 0.98	CoRE-MOF Quantum MOF	Geometry: 16 descriptors including AGNI fingerprint and Gaussian symmetry functions with cutoff of 5A Chemistry: 24 descriptors including the average, average signed, maximum, and minimum differences between the six elemental properties of each atom with the first nearest neighbors Atomic: 6 descriptors including site elemental properites, including atomic number and mass, row and column on perio…	A ML method was developed and trained on DFT simulations to predict the heat capacity of solid nanoporous sorbents, including MOFs, zeolites, and COFs The ML model's highly accurate heat capacity prediction allows for quantifying the influence of heat capacity variations on material ranking in a temperature swing adsorption (TSA) process		doi.org/10.1038/s41563-022-01374-3	A data-science approach to predict the heat capacity of nanoporous materials
4	2021	Yao et al.	MOFS	SmVAE RNN	Materials Design property-orientated generative design of reticular frameworks	CO2 uptake in CO2/N2 separation MAE (mol/kg): 0.09 CO2 uptake in CO2/CH4 separation MAE (mol/kg): 0.19	CoRE 2019-ASR	Reticular Framework Representation (RFcode): edge, organic vertex, metal vertex, topology Textural properties: pore-limiting diameter (PLD), largest cavity diameter (LCD), density and accessible gravimetric surface area (AGSA)), natural gas separation properties: CO2 uptake, CH4 uptake and CO2/CH4 selectivity flue gas separation properties: CO2 uptake, N2 uptake and CO2/N2 selectivity	An automated platform has been developed for nanoporous material discovery using a supermolecular variational autoencoder (SMVAE) to create reticular frameworks with optimized properties The MOF structures generated by the SMVAE model showed significant competitiveness against some of the best-performing MOFs/zeolites reported to date. The platform was employed to design new MOFs with improved CO…		doi.org/10.1038/s42256-020-00271-1	Inverse design of nanoporous crystalline reticular materials with deep generative models
5	2023	Gao et al.	ZIF	XGB RF GBM MLP	Adsorption Behavior Adsorption sites prediction	Accuracy (MLP) = 100%	2400 simulation datapoints		To gain a comprehensive understanding of the adsorption behaviors, a ML-assisted analysis was employed to pinpoint the preferred CO2 adsorption sites for each framework at various four distinct temperatures The center-of-mass coordinates of 800 CO2 molecules were randomly selected and labeled with their corresponding binding site types. Various well-known ML algorithms were applied to learn the r…		doi.org/10.1016/j.seppur.2023.123469	Computational evaluation of RHO-ZIFs for CO2 capture: From adsorption mechanism to swing adsorption separation
6	2022	Krokidas et al.	ZIF	RFR DTR		diffusivity: R2 = 0.96 EV = 0.96 Two step ML strategy: Aperture size(RFR): R2 = 0.90 EV = 0.91 diffusivity(DTR): R2 = 0.86 EV = 0.85 diffusivity(RFR): R2 = 0.93 EV = 0.93	simulation data	Linker, Metal, Functional Groups, Penetrant Ionic radius of metal, Length, Mass, σ and ε of aperture atoms, Length, Mass, van der Waals diameter, Kinetic diameter Acentric factor	For the first time, ML is used to investigate how the substitution of basic MOF building blocks affects pore structure and molecular diffusivity. While the ML approach is general, the focus is specifically on ZIFs with SOD topology Due to the lack of a relevant ZIF database, an ensemble of 72 new and existing ZIFs has been created through systematic sub-unit replacement. Forcefields were develope…		doi.org/10.1039/d2ta02624d	Data mining for predicting gas diffusivity in zeoliticimidazolate frameworks (ZIFs)
7	2022	Yang et al.	COF	DT RF XGBoost CatBoost	Materials Design Property Prediction	CO2 adsorption uptake: R2(DT): 0.836 RMSE(DT): 0.1438 MAE(DT): 0.0830 R2(RF): 0.859 RMSE(RF): 0.094 MAE(RF): 0.0830 R2(XGBoost): 0.897 RMSE(XGBoost): 0.1329 MAE(XGBoost): 0.0828 R2(CatBoost): 0.947 RMSE(CatBoost): 0.1245 MAE(CatBoost): 0.0627 CO2/N2 selectivity: R2(DT): 0.783 RMSE(DT): 13.16 MAE(DT): 6.82 R2(RF): 0.836 RMSE(RF): 12.96 MAE(RF): 5.89 R2(XGBoost): 0.842 RMSE(XGBoost): 9.40 MAE(XGBoo…	a dataset including 516 experimental datapoints collected from CoRE COFs	Functional Groups (FG) Interlayer Spacing (IS) void fraction (Vf) surface area (Sacc) pore limiting diameter (PLD) largest cavity diameter (LCD)	This study employed ML-assisted MC computational screening to identify the optimal secondary building units (SBUs) for wet flue gas separation using COFs. It has been found that tetraphenylporphyrin units enhanced CO2 adsorption uptake, while functional groups improved CO2/N2 selectivity. Based on these findings, 1233 COFs were assembled using the optimal SBUs The study analyzed the quantitative …		doi.org/10.1021/acsami.2c17109	Multi-Scale Computer-Aided Design of Covalent Organic Frameworks for CO2 Capture in Wet Flue Gas
8	2021	Yuan et al.	Biomass Waste-Derived Porous Carbons (BWDPCs) regular porous carbons (RPCs) heteroatom-doped porous carbons (HDPCs)	GBDT LGB XGB	Prediction of CO2 Adsorption	BWDPCs: R2(GBDT)_train: 0.98 R2(GBDT)_test: 0.84 RPCs: R2(GBDT)_train: 0.99 R2(GBDT)_test: 0.86 HDPCs: R2(GBDT)_train: 0.98 R2(GBDT)_test: 0.79	a data set including 527 data points collected from peer-reviewed publications	textural properties: surface area (SA), total pore volume (TPV), micropore volume (MPV) elemental compositions of the BWDPCs: elemental compositions of carbon (C), hydrogen (H), nitrogen (N), and oxygen (O) contents (wt %) adsorption parameters: e.g. temperature (T) and pressure (P)	ML has been utilized to systematically map the relationship between CO2 adsorption and the textural and compositional properties of BWDPCs (Biomass Waste-Derived Porous Carbons), along with adsorption parameters Permutation importance plots of the entire dataset revealed that the P and T of the adsorption experiments had the most significant impact on the model's predictions. Textural properties,…		https://doi.org/10.1021/acs.est.1c01849	Applied Machine Learning for Prediction of CO2 Adsorption on Biomass Waste-Derived Porous Carbons
9	2022	Ma et al.	Porous Carbons	RF	Study the effects of different features on CO2 adsorption performance CO2 Adsoption Capacity Prediction	R2 > 0.97	1594 CO2 adsorption datasets collected from litrature	Pore structure (PS): total pore volume (Vt), micropore volume (Vm), ultra-micropore volume (Vu), specific surface area (Sbet) Chemical properties (CP): oxygen groups (O, at.%) nitrogen groups (N, at.%) Adsorption conditions: temperature (T) pressure (P)	RF algorithm is applied to study the effects of pore structure, chemical properties, and adsorption conditions on CO2 adsorption performance The results indicate that at low P (0-0.15 bar), P is a significant factor in CO2 adsorption capacity. However, as P increases, the relative importance of P in CO2 adsorption capacity decreases Chemical properties and pore structure are also important factor…		https://doi.org/10.1016/j.seppur.2022.122521	Insights into CO2 capture in porous carbons from machine learning, experiments and molecular simulation
10	2022	Zhang et al.	amine-functionalized adsorbents Tetraethylenepentamine (TEPA ) polyethylenimine (PEI) Mesoporous silica gels with different structures (SG-A,SG-B, and SG-C) activated carbon with different iodine values (YK-90, MZ-90 and MZ-120) Macroporous silicone material (KYX)	RF XGB SHAP	Correlation analysis Feature Analysis	Feature Importance SHAP value		amine type amine loading the pore volume pore size specific surface area	This study utilized ML to investigate the correlation between the CO2 adsorption performance of amine-functionalized adsorbents and input discriptors. It is found that amine loading was the most crucial factor affecting CO2 adsorption capacity, followed by pore volume. Pore size was the primary factor influencing amine efficiency, while the cycle stability of the adsorbent was mainly related to t…		https://doi.org/10.1021/acssuschemeng.2c04492	Design and Optimization of Solid Amine CO2 Adsorbents Assisted by Machine Learning
11	2023	Cheng et al.	MOF membranes	ANN	adsorption capacity self-diffusivity permeability	MSE = 0.0086 coefficient of determination = 0.9822	Costum dataset containing 1340 individulal datapoints	feed CO2 mole fraction (z) temperature (T) partial pressure (p)	This work proposes a multi-scale design framework for CO2/CH4 separation via MOF-based membrane. The framework combines MD, ML, process modeling and simulation ANN prediction models were created and trained using MD and GCMC simulations to characterize the adsorption capacity and self-diffusivity of MOF membranes. The models were subsequently employed to determine permeability The tanks-in-series…		https://doi.org/10.1016/j.memsci.2023.121430	Multi-scale design of MOF-based membrane separation for CO2/CH4 mixture via integration of molecular simulation, machine learning and process modeling and simulation
12	2022	Xie et al.	Porous Carbons	RF SVM LR MLP SHAP	adsorption capacity	R2_test = 91% RMSE_test = 0.31	custom dataset containing 4589 datapoints of 239 porous carbon	Adsorption conditions: pressure (P) tempreature (T) Textural propertie and elemental compositions: specific surface area (SSA) micropore volume (Vmi) mesopore volume (Vme) nitrogen content (N) carbon content (C) hydrogen content (H) oxygen content (O)	In this study, RF algorithm was effectively trained to forecast CO2 adsorption capacity SHAP has been utilized to gain insights into the unclear relationship between each physicochemical property and adsorption capacity. The findings revealed that textural properties are more influential than chemical composition in determining CO2 uptake SHAP analysis revealed that the highest CO2 adsorption cap…		https://doi.org/10.1016/j.jece.2022.109053	Explainable machine learning for carbon dioxide adsorption on porous carbon
13	2022	Zhu et al.	Metal Zeolits	XGBoost GBR Extra Trees KNN DT ANNs SVR MLR Linear Ridge LASSO	CO2 reduction reactivity	MAE (XGBoost) = 0.36 eV R2(XGBoost) = 0.87	dft calculated data	Reaction Pathway: number of h in carbon atom (HC) number of h in H2O, CH3OH and CH4 species (HS) coordination number for carbon to metal (NC) number of (H+/e-) transfer in reaction step (PS) Metal Center: d-shell valence electrons of metal (Nd) electron affinity (EA) Electronic: global electronegativity difference (δχT) average ionization energy difference (δIE) Charge Transfer (CT) Band Gap (Eg)…	DFT calculations and ML models were employed to predict the ΔG and P of all possible reaction intermediates and products, including methanol, methane, and formaldehyde, during the reduction of CO2 on 26 single-atom catalysts (SACs) in zeolites The ML models proposed in this study exhibit good transferability and can be utilized to predict the performance of MOFs, 2D materials, and molecular compl…		https://doi.org/10.1021/acscatal.2c03250	A Machine Learning Model To Predict CO2 Reduction Reactivity and Products Transferred from Metal-Zeolites
14	2022	Yan et al.	geological heterogeneous porous media (aquifer)	DNN (FNO) Feature Coarsening	prediction the temporal-spatial evolution of pressures in a 3D porous media reservoir	FNO with stride = 2, 3: mean relative error = 0.63%	simulation data	Logarithmic permeability (log(k)) Porosity (φ) fuid phase rate (q) time(t)	a deep learning (DL) workflow presented for predicting the pressure evolution of fluid flows in large-scale 3D heterogeneous porous media due to fluid injection The study developed an efficient feature coarsening technique to extract the most representative information for DL training and prediction at the coarse scale. The technique also allowed for the recovery of resolution at the fine scale t…		https://doi.org/10.1038/s41598-022-24774-6	Improving deep learning performance for predicting large‑scale geological CO2 sequestration modeling through feature coarsening
15	2021	Mashhadimoslem et al.	Activated carbon	MLP RBF	Specific Surface Area Prediction CO2 adsoprtion capacity prediction	Adsorption: R2(MLP) = 0.9921 MSE(MLP) = 0.000001 RMSE(MLP) = 0.0001 R2(RBF) = 0.9994 MSE(RBF) = 0.0002 RMSE(RBF) = 0.002 BET: R2(MLP) = 0.9921 MSE(MLP) = 0.000001 RMSE(MLP) = 0.0055 R2(RBF) = 0.9994 MSE(RBF) = 0.0002 RMSE(RBF) = 0.0052	Costum dataset containing 421 datapoints, collected from exprimental data from litratures	precursors, activators pyrolysis temperatures pour volumes adsorption pressure adsorption temperature	The objective of this study was to develop ANN models capable of accurately predicting the BET surface area and CO2 adsorption capacity of activated carbons (ACs) produced from various biomass precursors and activators The study evaluated the impact of individual parameters on CO2 uptake, and found that textural features were more influential than activators in determining the CO2 adsorption capa…		https://doi.org/10.1021/acs.iecr.1c02754	Development of Predictive Models for Activated Carbon Synthesis from Different Biomass for CO2 Adsorption Using Artificial Neural Networks
16	2023	Kriesche et al.	COF	NNP (Neural Network Potential): ANI-2x	Storage and diffusion of CO2 in COF				In this study, the ANI-2 NNs potential (NNP) was integrated with a MD framework to model the behavior of two COF systems, HEX COF1 and 3D-HNU-5, which share the same linking unit. The results indicate that the ANI-2x NNP is capable of accurately describing the structures of macromolecules such as COFs, as well as their interactions with CO2 guest molecules The main innovation of this study is the…	noteworthy limitations include the inability to model macroscopic effects entailed by the simulation on a molecular scale as well as the difficulties to quantitatively reflect the CO2-COF interaction energy with ANI-2x, observed in the case of HEX-COF1.	https://doi.org/10.3389/fchem.2023.1100210	Storage and diffusion of CO2 in covalent organic frameworks—A neural network-based molecular dynamics simulation approach
17	2022	Feng et al.	MOF	DeepFM	adsorption properties prediction	CO2 uptake: R2 = 0.97 MAE = 0.017 Selectivity: R2(directly) = 0.69 MAE(directly) = 0.024 R2 (indirectly) = 0.95 MAE (indirectly) = 0.009	28 adsoption properties of 8206 hypothetical MOFs were selected as the data set	Surface area (SA) porosity argest cavity diameter (LCD) pore limiting diameter (PLD) metal linker organic linker1 organic linker2 functional group topology MOFID propertyID	A recommendation system for materials, which utilizes the DeepFM approach, has been created to predict multiple adsorption properties of hMOFs by integrating descriptors The study investigated the importance of various descriptors on the CO2 capture capabilities of MOFs. The results revealed that MOFID is an extremely crucial descriptor. Excluding MOFID, the top five important descriptors for CO2…		https://doi.org/10.1016/j.seppur.2022.122111	Finding the optimal CO2 adsorption material: Prediction of multi-properties of metal-organic frameworks (MOFs) based on DeepFM
18	2021	Yuan et al.	polymer membranes	Multivariate Imputation by Chained Equations (MICE) Bayesian Linear Regression (BLR) Extremely Randomized Tree (ERT)	Missing value imputation	RMSE (BLR/PIMs)_CO2 = 0.12 RMSE (ERT/PIMs)_CO2 = 0.13 RMSE (BLR/polyimides)_CO2 = 0.11 RMSE (ERT/polyimides)_CO2 = 0.10 RMSE (BLR/average)_CO2 = 0.12 RMSE (ERT/average)_CO2 = 0.12 BLR (H2/CO2 selectivity): missing permeability: H2 and CO2 Accuracy = 0.88 Precision = 0.52 Recall = 1.00 missing permeability: H2 Accuracy = 0.96 Precision = 0.83 Recall = 0.90 missing permeability: CO2 Accuracy = 0.85…	Polymer Gas Separation Membrane Database	gas permeability	To address missing values in the database, ML was utilized to impute or fill in the missing data For systems with limited experimental data, sparse feature ML was utilized. The study suggests that once the permeability of CO2 and/or O2 for a polymer has been measured, most other gas permeabilities and selectivities, including those for CO2/CH4 and CO2/N2, can be quantitatively estimated through t…		https://doi.org/10.1016/j.memsci.2021.119207	Imputation of missing gas permeability data for polymer membranes using machine learning
19	2022	Kondinski et al.	Metal Organic Polyhedra (MOP)	Knowledge graph engineering	Materials Design MOP Design		curated relevant MOP and CBU data from litrature		a knowledge engineering technology was utilized to automate the development of MOP formulations using existing knowledge as a basis An OntoMOPs ontology was created in this study to establish a clear definition of MOP and its essential properties		https://doi.org/10.1021/jacs.2c03402	Automated Rational Design of Metal−Organic Polyhedra (MOPs)
20	2021	Sturluson et al.	COF	Recommendation System	predictions of the missing (COF, adsorption property) values a “map” of COFs, wherein COFs, represented as points, with similar (dissimilar) adsorption properties congregate (separate)	R^2 = 0.71 RMSE = 0.52 MAE = 0.30	materials cloud simulated gas adsorption properties in M = 572 experimentally reported, porous COF materials	adsorption properties of different gases (CH4, H2O, H2S, Xe, Kr, CO2, N2, O2, and H2) in various conditions for different covalent organic frameworks (COFs)	The approach used in this study is to utilize the observed (NPM, property) values to impute any missing values a COF recommendation system is proposed that matches COFs with specific adsorption tasks. This was achieved by training a low-rank model of an incomplete COF-adsorption-property matrix, constructed from simulated uptakes of CH4, H2O, H2S, Xe, Kr, CO2, N2, O2, and H2 under various conditi…		https://doi.org/10.1021/acs.chemmater.1c01201	Recommendation System to Predict Missing Adsorption Properties of Nanoporous Materials
21	2019	Wang et al.	Porous Carbons	DNN	CO2 uptake prediction CO2/N2 selectivity prediction	R2(CO2 ads) = 0.96 R2(BET SSA) = 0.70	Training Neural Networks for CO2 and N2 Uptakes: 1138 CO2 adsorption data points colected from litratures Exploration of the Porous Carbon Space: 125000 hypothetical data points By varying SBET, Vmeso, and Vmicro	textural features of micropore volume, mesopore volume, and BET surface area plus tempreature and pressure conditions	DNNs were trained using experimental data on CO2 and N2 uptakes in porous carbons. The training was based on textural features such as micropore volume, mesopore volume, and BET surface area The trained DNN model was subsequently employed to screen porous carbons and predict their CO2 and N2 uptakes, as well as CO2/N2 selectivity In this study, 2,500 hypothetical combinations of micropore volume …		http://dx.doi.org/10.1021/acsmaterialslett.9b00374	Insights into CO2/N2 Selectivity in Porous Carbons from Deep Learning
22	2022	Raji et al.	zeolite	Hybrid-ANFIS PSO-ANFIS LSSVM		MSE AARD R2 STD	490 experimental data points of CO2 adsorption in 5 different zeo lites including:. T-Type, 5A, SAPO-34, 13X and SSZ-13 were gathered from the literature.	The inputs of models were considered as temperature (T, K), pressure (P, bar)	The main goal of this study is to develop efficient prediction models using soft computing methods, specifically Hybrid-ANFIS, PSO-ANFIS, and LSSVM, for estimating CO2 adsorption on five distinct types of zeolites: 5A, 13X, T-Type, SSZ-13, and SAPO-34. The aim is to provide an alternative to the costly and time-consuming laboratory experiments currently used for this purpose Based on the results,…		https://doi.org/10.1016/j.jenvman.2022.114478	Novel prosperous computational estimations for greenhouse gas adsorptive control by zeolites using machine learning methods
23	2022	Yamaguchi et al.	Homogeneous sand sediments	RNN FNN	predict the permeability change caused by the hydrate formation	Hydrate Shape RNN: Training Error (training) = 4.09 % Validation Error (validation) = 4.44 %	A total of 1500 microscale simulations were conducted to create a database. he number of the total data points were approximately 90,000	Hydrate Shape RNN: Inputs: Pressure Temperature Water saturation CO2 saturation Hydrate saturation Porosity Dissolved CO2 concentration Specific surface area Tortuosity x direction Tortuosity y direction Tortuosity z direction Maximum pore size Outputs: Specific surface area Tortuosity x direction Tortuosity y direction Tortuosity z direction Permeability NN: Inputs: input parameters: Hydrate sat…	In this study, a novel multiscale numerical method is proposed to estimate the permeability of hydrate-bearing sediments in reservoir-scale simulations spanning several hundred meters. The method utilizes a ML technique based on a database of results from microscopic pore-scale simulations of a couple of hundred micrometers The aim of this study is to introduce a new framework for calculating the…		https://doi.org/10.1016/j.fuel.2022.126678	Multiscale numerical simulation of CO2 hydrate storage using machine learning
24	2018	Zhang et al.	Porous Carbons	DNN	Carbon Dioxide Adsorption prediction	ave err = 0.43	To make the predictions more widely useful, we screen more than 1000 CO2 adsorption data of porous carbons at different adsorption conditions	SBET Vmicro Vmeso temperature pressure	In this study, a DNN was trained as a generative model to establish the relationship between CO2 adsorption of porous carbons and their corresponding textural properties. Then, the NN was utilized as an implicit model to evaluate its ability to predict the CO2 adsorption capacity of unknown porous carbons It is found that when the Vmicro, Vmeso, and SBET are used as input neurons simultaneously, …		http://dx.doi.org/10.1002/ange.201812363	Prediction of Carbon Dioxide Adsorption via Deep Learning
25	2022	Thanh et al.	underground saline aquifers	RF XGBoost SVR		RMSE (XGBoost) = 0.0041 R2 (XGBoost) = 0.9993 RMSE (RF) = 0.0243 R2 (RF) = 0.9781 RMSE (SVR) = 0.074 R2 (SVR) = 0.9284	A diverse field-scale simulation database of 1509 samples were collected from the literature	Inputs: Injection period Post-injection period Porosity Permeability Thickness Salinity Depth Residual gas saturation (Sgr) Injection rate outputs: residual trapping efficency factor (RTI) solubility trapping efficency factor (STI)	This study developed three supervised machine learning-based models to predict the trapping efficiency of CO2 sequestration in saline formations The ML models were ranked according to their accuracy, with XGBoost being the most accurate, followed by RF and SVR The proposed model could serve as a valuable and practical template for predicting CO2 trapping indices in other saline formations around …	The proposed ML model could only predict the RTI and STI for CO2 storage in deep saline aquifers. However, it cannot provide infor mation regarding the dynamic trapping process and detailed spatial distribution. Although the RF and SVR methods are less accurate than the XGBoost method, their regression accuracy is still sufficient. Thus the pre diction of STI and RTI can be achieved using familia…	https://doi.org/10.1016/j.seppur.2022.122111	Knowledge-based machine learning techniques for accurate prediction of CO2 storage performance in underground saline aquifers

## Sheet: Groundwater
Paper No	Year	Authors	Porous Media type	ML model	Application	Evaluation metric	Data-set	Input	Key findings	Challenges/limitations	DOI	Title
1	2006	Pappenberger, F., Matgen, P., Beven, K.J., Henry, J.-B., Pfister, L.					Pre-flood and flood SAR images, continuous water level measure_x0002_ments upstream and downstream of the river reach, sur_x0002_veyed high water marks and GPS control points of the maximum flood extent	Rainfall	Flooding; Uncertainty analysis; Free surface flow; Sensitivity analyse; Modelling	Data Uncertainty - Model Complexity- Calibration and Validation- Computational Constraints- Generalizability-Accessibility of Data and Resources	https://doi.org/10.1016/j.advwatres.2005.11.012	Influence of uncertain boundary conditions and model structure on flood inundation predictions
2	2017	Teng, J., et al	Soil				Some well-known software/models that are capable of modelling flood inundation	methodology or data sources of flood monitoring	Flooding - Empirical methods- Hydrodynamic models- Remote sensing- 1D, 2D, 3D hydrodynamic model	Data Availability and Quality - Generalizability-Selection Bias- Currency and Scope- Uncertainty in Model Comparisons- Limited Emphasis on Uncertainty Analysis-Lack of Standardization	https://doi.org/10.1016/j.envsoft.2017.01.006	Flood inundation modelling: A review of methods, recent advances and uncertainty analysis
3	2018	Hamel, P., Riveros-Iregui, D., Ballari, D., Browning, T., Célleri, R., Chandler, D., Chun, K. P., Destouni, G., Jacobs, S., Jasechko, S., Johnson, M., Krishnaswamy, J., Poca, M., Pompeu, P. V., & Rocha, H.	Soil				Hydrologic datasets from universities around the world, or the iMHEA4 network, collecting and curating hydrologic information in the Andes	isotopic compositions of waters - compositions of catchment inputs (i.n., rain, fog, and snow) - fog capture	ecosystem services- investment in watershed services (IWS) programs-land management, policy support- tropical mountains	Data Limitations - separate the effect of land intervention from other watershed characteristic -watershed monitoring- Practical challenges- structure and level of complexity	https://doi.org/10.1002/eco.1921	Watershed services in the humid tropics: Opportunities from recent advances in ecohydrology
4	2020	Khosravi, K., R Barzegar, S Miraki, J Adamowski, P Daggupati		Lazy learners(locally weighted learning (LWL) - Kstar) , Tree-based algorithm (M5P) , Meta Classifier Algorithm	Solar Radiation Prediction - Water Quality Contaminants - Groundwater Fluoride Contamination		70% for model training (calibration) and 30% for model evaluation (validation) - 70% of the dataset, and a testing/validation set consisting of 30% of the dataset, using the 10-fold cross-validation technique	Fluoride Levels - Water Quality Variables - Groundwater Constituent	Groundwater Fluoride - Groundwater Constituent	Data availability and quality - Generalizability to different water bodies and regions - Data preprocessing and feature engineering	https://doi.org/10.1111/gwat.12963
5	2019	Abdulelah Al-Sudani Z, Salih SQ, Sharafati A, Yaseen Z		Fuzzy logic, neural network, support vector machine and genetic programming models - extreme learning machine (ELM), classical support vector regression (SVR), and generalized regression neural network (GRNN)	Solving and capturing the complexity of hydrological applications		statistical characteristic of the inspected streamflow - training and testing data	Streamflow values were up to five months; hence, five input combinations were constructed based on the lags of the previous months	MARS-DE, Streamflow simulation- Semi-arid environment - Antecedent values - regression - streamflow	Implementation of a novel hybrid model called Multivariate Adaptive Regression Spline integrated with Differential Evolution (MARS-DE) to forecast streamflow pattern in semi-arid region - ain challenge with the quantification of streamflow is the inter_x0002_action of several hydrological components with this regard, such as groundwater seepage, evaporation/evapotranspiration, sub-water flow, and…	https://doi.org/10.1016/j.jhydrol.2019.03.004	Development of multivariate adaptive regression spline integrated with differential evolution model for streamflow simulation
6	2020	Bui, K Khosravi, J Tiefenbacher, H Nguyen, N Kazakis.	Soil	Data-mining algorithms (combinations of standalones with bagging (BA), CV parameter selection (CVPS) and randomizable filtered classification (RFC))			Six years (2012 to 2018) of monthly data from two water quality monitoring station	Turbidity , TS, and pH - water quality variables -BOD-COD-DO-FC-PO4	Water quality index - Data mining - Novel Hybrid algorithm -	main challenges in water quality prediction - Model selection and comparison - Model parameter selection and optimization - comprehensive information on the evaluation and validation - effectiveness of the proposed algorithms - Incorporation of domain knowledge - Data preprocessing and feature engineering	https://doi.org/10.1016/j.scitotenv.2020.137612	Improving prediction of water quality indices using novel hybrid machine-learning algorithms
7	2021	Khosravi K, Bordbar M, Paryani S, Saco PM, Kazakis N.	(sand, gravel, limestone, etc.)	Differential Evolution (DE) and Biogeography-Based Optimization (BBO) metaheuristic algorithms to optimize the GALDIT weights. Additionally, the Step-wise Weight Assessment Ratio Analysis (SWARA) and the Statistical Index (SI)	improve the accuracy of coastal aquifer vulnerability assessment	Correlation coefficients between the maps obtained from each method and Total Dissolved Solid (TDS)		Groundwater occurrence - Hydraulic conductivity - Level of groundwater above sea level - Distance from shoreline - Impact of seawater intrusion - Thickness of aquifer - TDS samples	MADM - GALDIT - SI - Coastal aquifer - BBO - DE	Model description - GALDIT framework - GALDIT parameters - Groundwater occurrence (Aquifer type) - Aquifer hydraulic conductivity (A). - Levels of groundwater above the sea level (L). - Distance fromth shoreline (D). - Impact of the existing status of seawater intrusion (I). - Aquifer thickness (T). - Stepwise weight assessment ratio analysis (SWARA) -	https://doi.org/10.1016/j.scitotenv.2021.145416	Newhybrid-based approach for improving the accuracy of coastal aquifer vulnerability assessment maps
8	2022	Khosravi, K., Golkarian, A. & Tiefenbacher, J.P.	Soil texture	BAT Metaheuristic Algorithm -Convolutional Neural Network (CNN)	Predict Daily Streamflow		Fifteen years of daily rainfall (Rt) and streamflow data from 1997 to 2012 were collected and used for model development and evaluation - Training and testing dataset	Rainfall and streamfow on the previous day	CNN-BAT, - Streamfow prediction - Antecedent rainfall - Deep learning - BAT Algorithm	Search for Suitable and Robust algorithms - Accurately Predict Stream Flow -Single Study Area - size of the training and validation sets was relatively small - some uncertainties	https://doi.org/10.1007/s11269-021-03051-7	Using Optimized Deep Learning to Predict Daily Streamflow: A Comparison to Common Machine Learning Algorithms
9	2021	Panahi, M., K Khosravi, S Ahmad, S Panahi, S Heddam, AM Melesse et al.	Soil and Sand and Soil texture	Deep learning algorithm of a convolutional neural network (CNN) using gray wolf optimization (GWO), a genetic algorithm (GA), and an independent component analysis (ICA)	New Hydrological Insights for the Region		154 raw datasets were collected including the time of measuring; sand, clay, and silt percent; bulk density; soil moisture percent; infiltration rate; and cumulative infiltration using field survey. Next, 70 % of the dataset were used for model building and the remaining 30 % was used for model validation.	cumulative infiltration, infiltration rate, and other effective variables that affect infiltration process	Cumulative infiltration - Infiltration rate - Deep learning - CNN -Metaheuristic	Hydrologic cycle affecting surface runoff, soil erosion, and groundwater recharge-	https://doi.org/10.1016/j.ejrh.2021.100825	Corrigendum to “Cumulative infiltration and infiltration rate prediction using optimized deep learning algorithms: A study in Western Iran” [J. Hydrol. Reg. Stud. 35 (2021) 100825]
10	2023	Riazi, M., K Khosravi, K Shahedi, S Ahmad, C Jun, SM Bateni, N Kazakis.	Soil and Rock and Texture	Radial Basis Function (RBF), and three hybrid models of Baging (BA-RBF), Random Committee (RC-RBF), and Random Subspace (RSS-RBF)	Flood susceptibility maps for planners and emergency management professionals in the early warning and mitigation stages of floods		training and testing datasets	Elevation, lithology, drainage density, rainfall, Normalized Difference Vegetation Index (NDVI), curvature, ground slope, Stream Power Index (SPI) -Topographic Wetness Index (TWI), soil, Land Use Land Cover (LULC), and distance from the river	Sentinel-1 SAR, CHIRPS data - Flood susceptibility mapping - Machine learning, BA-RBF, SAR images	performance of each model was evaluated using several error indicators, including correlation coefficient (r), Nash Sutcliffe Efficiency (NSE), Mean Absolute Error (MSE), Root Mean Square Error (RMSE), and the Area Under the Receiver Operating Characteristic (ROC) Curve (AUC)	https://doi.org/10.1016/j.scitotenv.2023.162066	Enhancing flood susceptibility modeling using multi-temporal SAR images, CHIRPS data, and hybrid machine learning algorithms
11	2022	Lu, Y.; Mei, G.	Two-doemsional Soil	Deep learning method-Physics-informed neural networks (PINN) -	Practical applications		training and testing datasets	Geometry - PDE - BC&IC - Training data - Parameters of the soil	Engineering geology; soil consolidation; excess pore water pressure; deep learning; physics-informed neural network (PINN)	predict the excess pore water pressure of two-dimensional soil consolidation - a fully connected neural network is constructed; the computational domain, partial differential equation (PDE), and constraints are defined to generate data for model training; and the PDE of two-dimensional soil consolidation and the model of the neural network- investigate large and complex multidirectional soil cons…	https://doi.org/10.3390/math10162949	A Deep Learning Approach for Predicting Two-Dimensional Soil Consolidation Using Physics-Informed Neural Networks (PINN)
12	2022	Muhammed Pandhiani, S.	Soil	Machine (SVM), M5P, Gaussian process (GP), random forest (RF), and multiple linear regression (MLR)	Management of hydrological energy and sustainable irrigation systems		126 observations, 70% for the purpose of training and the remaining 30% for testing.	Time (t) in seconds - clay (C) in percent, sand (S) in percent, fly ash (Fa) IN percent - bulk density (Bd) in gm/cc, and moisture content (Mc) in percent, while the output dataset includesinfiltration rate (g(t)) in mm/h	Minidisc infltrometer-Support vector regression - Gaussian process- M5P -Random forest	Growing population and globally changing weather conditions - modeling of infltration rate of the soil as efective and efcient substitute methods and their performances - Nash–Sutclife efciency coefcient (E), coefcient of correlation (R), and the root-mean-squared error (RMSE)	https://doi.org/10.1007/s12517-022-10125-2	Exploring the application of machine learning techniques for prediction of infiltration rate
13	2018	Prakash, S; Animesh Sharma; Sitanshu Sekhar Sahu.	Soil and Soil mosture	Multiple linear regression, support vector regression and shallow neural network	Prediction of moisture		These regression based techniques were applied on three different datasets. The two datasets are collected from the online repositories and the third dataset is prepared by collecting the data using the sensenuts device (wireless sensor network). - third dataset the MSE and R2 of 0.12 and 0.98 for 1 day ahead,0.20 and 0.96 for 2 days ahead and 0.20 and 0.95 for 7 days ahead	Dataset is prepared by collecting the data using the sensenuts device (wireless sensor network)- online repositories -	Agriculture, analysis, artificial intelligence, machine learning, multiple linear regression, prediction, shallow neural network, soil moisture, support vector regression, wireless sensor network	the evaluation of the MSE (mean squared error) and R2 (co-efficient of determination) - the analysis work for the prediction purpose to visualize the changes in the results	DOI: 10.1109/ICICCT.2018.8473260	SOIL MOISTURE PREDICTION USING SHALLOW NEURAL NETWORK
14	2023	Singh, A., Gaurav, K.	Soil and Texture of rock	Feed-forward Artifcial Neural Network (ANN) -Generalised Regression Neural Network (GRNN), Radial Basis Network (RBN), Exact RBN (ERBN), Gaussian Process Regression (GPR), Support Vector Regression (SVR), Random Forest (RF), Boosting Ensemble Learning (Boosting EL), Recurrent Neural Network (RNN), Binary Decision Tree (BDT), and Automated Machine Learning (AutoML)	Estimate surface soil moisture from satellite images		distribution analysis by creating thirty different sets of training-validation-testing datasets - Sentinel-1 (SAR), Sentinel-2 (optical) images, and digital elevation model (DEM) from the shuttle radar topographic mission (SRTM).	Satellite images - Longitude, VV, and VH - NDVI, DEM, and Latitude - incidence angle	Deep learning, Soil moisture, Multi‑sensor	calibrated TDR probe to measure surface soil moisture at 224 diferent locations distributed throughout the fan surface - input features to train, validate, and test the performance of the feed forward ANN model - performance of ANN model with ten diferent machine learning algorithms	https://doi.org/10.1038/s41598-023-28939-9	Deep learning and data fusion to estimate surface soil moisture from multi‑sensor satellite images
15	2022	Uthayakumar, A.; Mohan, M.P.; Khoo, E.H.; Jimeno, J.; Siyal, M.Y.; Karim, M.F.	Soil and Soil texture	Neural network, Support vector machine- linear regression and k-nearest neighbor	hydro-meteorological, agricultural research and climate change			Soil moisture	KNN- linear regression; microwave radar - neural network-SVM - soil moisture-volumetric- water content	The radar captures the reflected signals that are post processed - efficiency of the machine learning model is computed using root mean square error, co-efficient of determination and mean absolute error -develop cost-effective solutions for common users such as agriculturists to monitor the soil moisture conditions with improved accuracy	https://doi.org/10.3390/s22155810	Machine Learning Models for Enhanced Estimation of Soil Moisture Using Wideband Radar Sensor
16	2019	Hulbert, C., Rouet-Leduc, B., Johnson, P. A., Ren, C. X., Rivière, J., Bolton, D. C., & Marone, C.	Granular texture		Similarity of fast and slow earthquakes		training dataset - testing dataset	Laboratory slow earthquakes-Acoustic signals -stick–slip and creep–slip modes	Slow earthquakes - Machine learning - Acoustic signals - stick–slip, creep–slip	Laboratory slow earthquakes (slow and fast slip modes) - radiate elastic energy - Acoustic emissions generated during shear of quartz fault gouge under normal stress-	https://doi.org/10.1038/s41561-018-0272-8	Similarity of fast and slow earthquakes illuminated by machine learning
17	2020	Kadow, C., Hall, D. M., & Ulbrich, U.		Neural Network Architectur(NAA)	Global annual mean temperature time series		global climate datasets - climate datasets - original dataset - independent climate test datasets - HadCRUT4 consists of a 100-member dataset	Numerical climate model data	climate information - artificial intelligence -	Developed image inpainting techniques perform accurate monthly reconstructions via transfer learning using either 20CR (Twentieth-Century Reanalysis) or the CMIP5 (Coupled Model Intercomparison Project Phase 5) - Historical temperature measurements are the basis of global climate datasets like HadCRUT4	https://doi.org/10.1038/s41561-020-0582-5	Artificial intelligence reconstructs missing climate information
18	2018	Marone, C.			earthquake physics - earthquake forecasting		large geoscience datasets - complex datasets - remote sensing datasets	earthquake physics	Training machines -Earthly ways - Machine learning	Solid Earth Geoscience	https://doi.org/10.1038/s41561-018-0117-5	Training machines in Earthly ways (Machine Learning)
19	2023	Sahour, S., Khanbeyki, M., Gholami, V. et al.	Soil and Soil materials	Extreme gradient boosting (XGB), random forest (RF), support vector machine (SVM), artifcial neural networks(ANN), k-nearest neighbor (KNN), and Gaussian classifer model (GCM)			Groundwater quality modeling(GWQI) and its associated variables - target (independent variable) and multiple predictors (dependent variables) -	Groundwater samples	GWQI · Machine learning · Classifcation algorithms · GIS · Groundwater quality map	groundwater quality index (GWQI) in each well was measured and classifed into four classes: very poor, poor, good, and excellent, according to their cut-of values- Factors afecting groundwater quality - The algorithms were evaluated using the receiver operating characteristic curve (ROC) and statistical efciencies	https://doi.org/10.1007/s11356-023-25596-3	Evaluation of machine learning algorithms for groundwater quality modeling
20	2018	Sajedi-Hosseini, F., Malekian A., Choubin, B., Rahmati, O., Cipullo, S., Oulon, F., Pradhan, B.	Soil and Soil media	Boosted regression trees (BRT)- Multivariate discriminant analysis (MDA)- support vector machine (SVM)			70% of the data were used to calibrate the models and 30% were used for testing	Vulnerability of groundwater	Groundwater pollution - Nitrate - Probability - Vulnerability - GIS	Develop a novel framework for risk assessment of nitrate groundwater contamination - integrating chemical and statistical analysis for an arid region	https://doi.org/10.1016/j.scitotenv.2018.07.054	A novel machine learning-based approach for the risk assessment of nitrate groundwater contamination
21	2022	Zhu, M.,Jiawei Wang, Xiao Yang, Yu Zhang, Linyu Zhang, Hongqiang Ren, Bing Wu, Lin Ye.	Ground				drinking water quality datasets - water surface image dataset - water quality datasets		Machine learning - Water quality - Evaluation - Prediction	solutions for water pollution control, water quality improvement, and watershed ecosystem security management - Probability of groundwater pollution - Validation of the models	https://doi.org/10.1016/j.eehl.2022.06.001	A review of the application of machine learning in water quality evaluation
22	2022	Kumar, S., Pati, J.,	Soil and Texture of the soil	Random Forest - Optimized Forest - CS Forest - SPAARC - SPAARC			data collected from 62 different locations of Varanasi in the Indo Gangetic region and classification of water as safe and unsafe - 62 instances that were trained and tested by using Optimized Forest, SPAARC, CS Forest, Reduced Error Pruning (REP) Tree, and Random Forest	Safe and unsafe in groundwater samples	Arsenic, CS forest, machine learning, optimized forest, random forest	Classify water samples - arsenic concentration in water - groundwater quality parameter - analyze the performance of models	https://doi.org/10.2166/wh.2022.015	Assessment of groundwater arsenic contamination using machine learning in Varanasi, Uttar Pradesh, India
23	2022	Meray, A., Sturla, S., Siddiquee, M., Serata, R., et al.	Soil and groundwater sites	Unsupervised Learning - Supervised Learning - Well Placement Optimization	Python package PyLEnM (Python for Long-term Environmental Monitoring).		Historical data - monitoring data- groundwater data	long-term groundwater contamination	Open-source package, machine learning, spatial estimation, sensor placement optimization, Gaussian process model, unsupervised learning, groundwater contamination	seamless data-to-ML pipeline with various utility functions, such as quality assurance and quality control (QA/QC), coincident/colocated data identification, the automated ingestion and processing of publicly available spatial data layers, and novel data summarization/visualization	https://doi.org/10.1021/acs.est.1c07440	PyLEnM: A Machine Learning Framework for Long-Term Groundwater Contamination Monitoring Strategies
24	2014	Berhanu, B., Seleshi, Y., and Melesse, A. M.	Soil		Self-financed development of 6,000 MW hydropower		Number of potential sites - Hydropower potential - Percentage share of the total - Irrigation potential of the country by basin	Multi-weather systems rainfall	Surface water · Groundwater · Irrigation · Hydropower	spatiotemporal variability of the water resources - water resources of Ethiopia and the different challenges faced by the water sector	https://doi.org/10.1007/978-3-319-02720-3_6	Surface Water and Groundwater Resources of Ethiopia: Potentials and Challenges of Water Resources Development
25	2007	Jha, M. K., Chowdhury, A., Chowdary, V., and Peiffer, S.	Soil and Soil hydrology and Drainage texture		RS and GIS technologies - RS and GIS applications - Selection of artificial recharge sites - exploration and assessment of groundwater resources -selection of artificial recharge sites - GIS-based subsurface flow and pollution modeling -groundwater-pollution hazard assessment and protection planning - Estimation of natural recharge distribution		hydrogeologic data analysis and process monitoring - satellite data		Groundwater management - Remote sensing - Geographic information system (GIS) - GIS-based subsurface modeling . Groundwater vulnerability . Groundwater management	Manage natural resources in general and water resources -groundwater hydrology - hydrogeologic data analysis and process monitoring	https://doi.org/10.1007/s11269-006-9024-4	Groundwater management and development by integrated remote sensing and geographic information systems: prospects and constraint
26	2006	Israil, M., Al-Hadithi, M., and Singhal, D.	Ground					Indian remote sensing (IRS) LISS-III data - hydrogeological data	Geographical Information System (GIS) - hydrogeological -	calibrating electrical resistivity values - Electrical resistivity, groundwater level monitoring, and borehole and remote sensing data	https://doi.org/10.1007/s10040-005-0483-0	Application of a resistivity survey and geographical information system (GIS) analysis for hydrogeological zoning of a piedmont area, Himalayan foothill region, India
27	1996	Sander, P., Chesley, M. M., and Minor, T. B.						Landset Thermatic mapper (TM) - SPOT- Infrared aerial photography	Groundwater - Remot Sensing- GPS Technology - (Remote-sesing)	Increase the spatial accuracy of the various data inegrated in GIS	https://doi.org/10.1007/s100400050086	Groundwater Assessment Using Remote Sensing and GIS in a Rural Groundwater Project in GHANA: Lessons Learned
28	2018	Khosravi, K., Panahi, M., and Tien Bui, D	young and poorly consolidated highly porous detrital rock units (PeEf and Plq), and the unconsolidated Quaternary alluvium (PlQc).	Neuro-fuzzy inference system (ANFIS) and five metaheuristic algorithms, namely invasive weed op_x0002_timization (IWO), differential evolution (DE), firefly algo_x0002_rithm (FA), particle swarm optimization (PSO), and the bees algorithm (BA)	New artificial intelligence methods for the spatial prediction of ground water water spring potential mapping		training and testing datasets	13 groundwater conditioning factors: slope degree, slope aspect, altitude, plan curvature, streampower index (SPI), topographic wetness index (TWI), terrain roughness index (TRI), distance from fault, distance -from river, land use/land cover, rainfall, soil order, and lithology	Groundwater -Neuro-fuzzy inference system - metaheuristic optimization -	The global performance of these derived models was assessed using the area under the curve (AUC)	https://doi.org/10.5194/hess-22-4771-2018, 2018.	Spatial prediction of groundwater spring potential mapping based on an adaptive neuro-fuzzy inference system and metaheuristic optimization
29	2022	Hakim, H., AS Nur, F Rezaie, M Panahi, CW Lee, S Lee.	Soil pores and Porous Rock	convolutional neural network (CNN) and long short-term memory (LSTM)			70% of the input values became training data, while the remaining 30% of values were used as testing data.(70% training data and 30% testing data) - Frequency ratio values of groundwater potential-related factors	Elevation - Slope - Aspect - Soil Material - LS-Factor	Groundwater - Potential mapping - Convolutional neural network (CNN) - Long short-term memory (LSTM)	Generate a groundwater potential map -New hydrological insight for the region - AUC values	https://doi.org/10.1016/j.ejrh.2022.100990	Convolutional neural network and long short-term memory algorithms for groundwater potential mapping in Anseong, South Korea
30	2023	Morgan, H., Madani, A., Hussien, H.M. et al.	Soil types	Random forest classifcation			Groundwater potential map was predicted and classified as good (5.1%), moderate (0.1%), poor (4.2%) and non-potentiality (90.6%). Sensitivity (92%), F1-score (94%) and accuracy (97%)	Elevation, slope angle, slope aspect, terrain ruggedness index, curvature, lithology, lineament density, distance from major fractures, topographic wetness index, stream power index, drainage density, rainfall, as well as distance from rivers and channels, soil type and land use/land cover	Groundwater potential map - Imbalanced dataset -Random forest - Variable importance	Efects of climate change - rapid population growth increase the demand for freshwater, particularly in arid and hyper-arid environments	https://doi.org/10.1186/s40562-023-00261-2	Using an ensemble machine learning model to delineate groundwater potential zones in desert fringes of East Esna-Idfu area, Nile valley, Upper Egypt
31	2022	Muhammed Pandhiani, S.	Soil	Machine (SVM), M5P, Gaussian process (GP), random forest (RF), and multiple linear regression (MLR)	Management of hydrological energy and sustainable irrigation systems		126 observations, 70% for the purpose of training and the remaining 30% for testing.	Time (t) in seconds - clay (C) in percent, sand (S) in percent, fly ash (Fa) IN percent - bulk density (Bd) in gm/cc, and moisture content (Mc) in percent, while the output dataset includesinfiltration rate (g(t)) in mm/h	Minidisc infltrometer-Support vector regression - Gaussian process- M5P -Random forest	Growing population and globally changing weather conditions - modeling of infltration rate of the soil as efective and efcient substitute methods and their performances - Nash–Sutclife efciency coefcient (E), coefcient of correlation (R), and the root-mean-squared error (RMSE)	https://doi.org/10.1007/s12517-022-10125-2	Exploring the application of machine learning techniques for prediction of infiltration rate
32	2019	Khosravi, K., H Shahabi, BT Pham, J Adamowski, A Shirzadi, B Pradhan et al.	Soil type	Naïve Bayes Trees and Naïve Bayes(NBT and NB)	Multi-Criteria Decision-Making Analysis, GIS		70% of the flood and non-flood locations were used, whereas the remaining 30% of flood and non-flood locations were used to generate the testing dataset, validation datasets, training dataset	Normalized Difference Vegetation Index (NDVI), lithology, land use, distance from river, curvature, altitude, Stream Transport Index (STI), Topographic Wetness Index (TWI), Stream Power Index (SPI), soil type, slope and rainfall.	Flood susceptibility - Machine Learning - Multi-Criteria Decision-Making - GIS	Floods effects on human life and property -Three Multi-Criteria Decision-Making (MCDM) analysis techniques (VIKOR, TOPSIS and SAW), strong flood prediction capability	https://doi.org/10.1016/j.jhydrol.2019.03.073	A comparative assessment of flood susceptibility modeling using Multi- Criteria Decision-Making Analysis and Machine Learning Methods
33	2022	Ijlil, S.; Essahlaoui, A.; Mohajane, M.; Essahlaoui, N.; Mili, E.M.; Van Rompaey, A.	Soil texture and Soil media	DRASTIC-Random Forest (RF) - DRASTIC Support Vector Machine (SVM) - DRASTIC-Multilayer Perceptron (MLP) - DRASTIC-RF-SVM - DRASTIC-RF-MLP	Groundwater pollution poses		spatiotemporal datasets - 70 points which served as training sample (70%) and 30 points which served as validation sample (30%) - training and validation dataset	Nitrate values - Machine learning (ML) algorithms	Groundwater pollution risk - Vulnerability- DRASTIC -Machine learning algorithms -Bivariate statistic -	Groundwater pollution assessment - Performances of five new hybrid/ensemble machine learning (ML) models	https://doi.org/10.3390/rs14102379	Machine Learning Algorithms for Modeling and Mapping of Groundwater Pollution Risk: A Study to Reach Water Security and Sustainable Development (Sdg) Goals in a Mediterranean Aquifer System
34	2022	Moosavi, V., Zeinab Gheisoori Fard, Mehdi Vafakhah.		Neuro-Fuzzy InferenceSystem (ANFIS), Support Vector Regression (SVR), Group Method of Data Handling (GMDH), Random Forest (RF) and Partial Least Square Regression (PLS)			input dataset	Precipitation, temperature, evaporation, air humidity, wind speed, discharge, ante_x0002_cedent precipitation index and antecedent discharge index	Artificial intelligence - Data driven model - Optimization - Signal processing - Taguchi method	signal processing methods-wavelet, ensemble empirical mode decomposition (EEMD) and singular spectrum analysis (SSA) - input dataset, data length, preprocessing and model type	https://doi.org/10.1016/j.jhydrol.2022.127429	Which one is more important in daily runoff forecasting using data driven models: Input data, model type, preprocessing or data length?
35	2017	Chen, W., Panahi, M., Pourghasemi, HR.		Neuro-fuzzy inference system (ANGIS) - g ANFIS-genetic algorithm (ANFIS-GA) - ANFIS-differential evolution (ANFIS-DE) - ANFIS-particle swarm optimization (ANFIS-PSO)	Hybrid models of ANFIS		validation datasets - training dataset	Different continuous and categorical landslide conditioning factors - maps were digitized in a GIS environment	Landslide susceptibility -Adaptive neuro-fuzzy inference system (ANFIS) - Genetic algorithm - Differential evolution - Particle swarm optimization- Hanyuan County	Probability certainty factor (PCF) model -Management of landslide susceptibility and hazard	https://doi.org/10.1016/j.catena.2017.05.034	Performance evaluation of GIS-based new ensemble data mining techniques of adaptive neuro-fuzzy inference system (ANFIS) with genetic algorithm (GA), differential evolution (DE), and particle swarm optimization (PSO) for landslide spatial modelling
36	2018	Hong, H., M Panahi, A Shirzadi, T Ma, J Liu, AX Zhu, W Chen, I Kougias et al.	Soil	Neuro-fuzzy inference system (ANFIS) - Step-wise Weight Assessment Ratio Analysis (SWARA)			investigations and analysing remote sensing datasets - training dataset - testing dataset	Different flood susceptibility classes	Climate change - Flood susceptibility - ANFIS - Genetic algorithm -		https://doi.org/10.1016/j.scitotenv.2017.10.114	Flood susceptibility assessment in Hengfeng area coupling adaptive neuro-fuzzy inference system with genetic algorithm and differential evolution
37	2018	Kouadio L, Deo RC, Byrareddy V, Adamowski JF, Mushtaq S, Phuong Nguyen V	Soil organic matter and Soil	Multiple Linear Regression (MLR) - Random Forest (RF) - Soil organic matter (SOM) - Root mean square error (RMSE) - Extreme Learning Machine (ELM) - Mean absolute error (MAE) - Willmott’s Index (WI) - Nash-Sutcliffe efficiency coefficient (ENS) -			independent testing dataset - soil fertility dataset - training dataset - validation dataset -Predictor Variable	Soil fertility parameters - Soil fertility parameters	Smallholder farms - Robusta coffee - Soil fertility - Extreme learning machine - Machine learning in agriculture -	Predicting coffee yield - Predictor variables based on the soil organic matter (SOM)	https://doi.org/10.1016/j.compag.2018.10.014	Artificial intelligence approach for the prediction of Robusta coffee yield using soil fertility properties
38	2019a	Samadianfard S, Jarhan S, Salwana E, Mosavi A, Shamshirband S, Akib S	Soil	Support vector regression (SVR), Optimization algorithm(FOA), M5 model tree (M5)			Statistical Parameters (RMSE - MAE - R - BIC)	Root mean squared error (RMSE) - Mean absolute error (MAE) - correlation coefficient® - Bayesian information criterion (BIC)	River flow forecasting -Hybrid machine learning - M5 model tree - Fruit flyoptimization algorithm (FOA) - Support vector regression - Deep learning, Hydro-informatics	River flow prediction systems - Operational River management forecasting	https://doi.org/10.3390/w11091934	Support Vector Regression Integrated with Fruit Fly Optimization Algorithm for River Flow Forecasting in Lake Urmia Basin
39	2019b	Samadianfard S, Majnooni-Heris A, Qasem SN, Kisi O, Shamshirband S, Chau K-w	Soil	Support vector regression (SVR), Model trees (MT), Gene expression programming (GEP), Neuro–fuzzy inference system (ANFIS)	Solar radiation estimation		70% of the whole dataset was utilized to train and the 30% of was used to test the mentioned models - Statistical parameters (RMSE - MAE - CC - WI)	Minimum temperature (Tmin), Maximum temperature (Tmax), Relative Humidity (RH), Sun-shine hours (n), maximum sunshine hours (N), corrected clear-sky solar irradiation (ICSKY) - Day of year (DOY), extra-terrestrial radiation (Ra)	Data-driven technics, Empirical Equations, Meteorological parameters, Global solar radiation	Solar radiation, moisture and temperature-meteorological variables -	https://doi.org/10.1080/19942060.2018.1560364	Daily global solar radiation modeling using data- driven techniques and empirical equations in a semi-arid climate
40	2020	Ali, M., Prasad, R., Xiang, Y., Deo, R.		Multiple linear regression (MLR) model - Covariance-weighted least squares (CWLS) - Hybridized MLR-CWLS	Optimization of more sustainable and renewable energy resources - Energy demand issues and potential energy crises - wave and ocean energy generation systems- renewable and sustainable energy resource management		testing dataset - sea-related datasets, - Testing performance of hybridized MLR-CWLS vs. benchmark models using correlation coefficient (R), root mean square error (RMSE), and mean absolute error (MAE).		Wave energy - Significant wave height - MLR - CWLS - MARS model - M5 tree -	Manage the climate change scenarios, Agriculture crops, and energy related matters with clearer models	https://doi.org/10.1016/j.rser.2020.110003	Near real-time significant wave height forecasting with hybridized multiple linear regression algorithms
41	2019	Kisi, O., Khosravinina, P., Nikpour, M.R., Sanikhani, H.,	Soil	Gene expression programming (GEP), M5 Tree model, multivariate adaptive regression spline (MARS), dynamic evolving neural-fuzzy inference system (DENFIS)			Error statistics for estimating LSZ using different input combinations in the test phase based on 50% training and 50% testing dataset - training and testing datasets	Hydraulics input variables(Discharge ratio (Qr), downstream Froude number (Fr3), and side slope angle of main channel (sin h))	Separation zone - River-channel confluence - M5 Tree - MARS model - GEP - DENFIS	Erosion and sedimentation in the River-Channel,	https://doi.org/10.1007/s00477-019-01684-0	Hydrodynamics of river-channel confluence: toward modeling separation zone using GEP, MARS, M5 Tree and DENFIS techniques
42	2022	Khosravi, K., Ali Golkarian, Assefa M. Melesse, Ravinesh C. Deo	Soil and soil texture	Elastic Network (EN), Alternating Model Tree (AM Tree), Reduced Error Pruning Tree (REP Tree) and the Dual Perturb and Combine Tree (DPC Tree) - Rotation Forest (RF)	Wrapper Feature Selection (WFS) to predict the Qssl		inputs and output in the training	Multiple scenarios comprised of antecedent flow discharge (Qw), rainfall (R) and Qssl - input combination scenarios based on monthly rainfall (R), flow discharge (Qw), and suspended sediment (Qssl) using the training dataset	Suspended sediment load - Input scenario - Wrapper feature selection - Machine learning - Hybrid algorithm -	Models parameter optimization - Model description - Model performance evaluation - Optimum input scenario	https://doi.org/10.1016/j.jhydrol.2022.127963	Suspended sediment load modeling using advanced hybrid rotation forest based elastic network approac
43	2018	Khosravi, K., Majid Sartaj, Frank T-C Tsai, Vijay P Singh, Nerantzis Kazakis, Assefa M Melesse, Indra Prakash, Dieu Tien Bui, Binh Thai Pham.	Soil and Soil media and Soil texture and Sandy Soil	Weights-of Evidence (WOE)- Shannon Entropy (SE)- Logistic Model Tree (LMT) - Bootstrap Aggregating (BA)	Sustainable management of groundwater resources		two nitrate datasets - raining and testing datasets	distance to fault, fault density, distance to river, river density, land-use, soil order, geological time scale, and altitude_x0002_	Groundwater vulnerability - DRASTIC - Weights-of-Evidence - Shannon Entropy	Improve groundwater vulnerability assessment - Evaluated quantitatively - Receiver Operating Characteristic (ROC) Curve (AUC) -	https://doi.org/10.1016/j.scitotenv.2018.06.130	A comparison study of DRASTIC methods with various objective methods for groundwater vulnerability assessment
44	2016	Barzegar, R., Asghari Moghaddam, A.	Ground	Multi-layer perceptron neural network (MLP) - Radial basis function neural network (RBFNN) - Generalized regression neural network (GRNN)	Salinity		Training data set and Testing data set ( R2 - RMSE - MARE)		Neural networks - Groundwater salinity prediction - Committee machine -	Ground water quality - Prediction of groundwater salinity - Electrical Conductivity [EC (lS/cm)] - Integrated method -	https://doi.org/10.1007/s40808-015-0072-8	Combining the advantages of neural networks using the concept of committee machine in the groundwater salinity prediction
45	2005	Zou, H., Hastie, T			Microarray classification and gene selection - diagnostic rule				LARS algorithm -Grouping effect - Lasso - Penalization - elastic net	Elastic net - regression problems - classification problems - maximum margin explanation - elastic net penalty in classification - ways to improve Lasso	https://doi.org/10.1111/j.1467-9868.2005.00503.x	Regularization and variable selection via the elastic net
46	2021	Ridwan, W.M., Sapitang, M., Aziz, A., Kushiar, K.F., Ahmed, A.N., El-Shafie, A	Soil	Bayesian Linear Regression (BLR) - Boosted Decision Tree Regression (BDTR) - Decision Forest Regression (DFR) - Neural Network Regression (NNR)			them diverse datasets - Average and projected rainfall value with its’ descriptive analysis	Rainfall forms and patterns	Forecasting rainfall - Machine learning algorithms - Boosted decision tree regression - Decision forest regression - Neural network regression - Bayesian linear regression	Evaluating different scenarios and time horizons, and forecasting rainfall -	https://doi.org/10.1016/j.asej.2020.09.011	Rainfall forecasting model using machine learning methods: Case study Terengganu, Malaysia
